# Supplementary material for: Observation- and Model-Based Estimates of Particulate Dry Nitrogen Deposition to the Oceans
Source: Copernicus journal article supplement (doi:10.5194/acp-2016-1123), 2017-01-16
Supplement: Supplementary file 1 [file Aerosol-N-Conc-Data.xlsx]

## Sheet: data (source sorted)
Database of aerosol nitrate (NO3-) and ammonium (NH4+) concentrations compiled for use in "Observation- and Model-Based Estimates of Particulate Dry Nitrogen Deposition to the Oceans", A. R. Baker, M. Kanakidou, K. E. Altieri, N. Daskalakis, G. S. Okin, S. Myriokefalitakis, F. Dentener, M. Uematsu, M. M. Sarin, R. A. Duce, J. N. Galloway, W. C. Keene, A. Singh, L. Zamora, J.-F. Lamarque, S.-C. Hs…
																Missing value: 999.0
							UTC						UTC			nmol/m3	nmol/m3
Origin	Basin	Cruise_ID	Sample	Start_Day	Start_Month	Start_Year	Start_Time	Start_Lat	Start_Long	End_Day	End_Month	End_Year	End_Time	End_Lat	End_Long	NO3	NH4
Lucy Spokes	Atlantic	CH127		9	6	1996	00:17:00	52.1571	-10.9907	9	6	1996	11:55:00			97.6371	90.6019
Lucy Spokes	Atlantic	CH127		9	6	1996	11:59:00	51.7143	-11.1792	10	6	1996	00:06:00			26.9752	37.5285
Lucy Spokes	Atlantic	CH127		10	6	1996	00:07:00	52.1338	-12.7536	10	6	1996	12:14:00			8.92577	9.04946
Lucy Spokes	Atlantic	CH127		10	6	1996	12:16:00	52.0259	-13.0212	11	6	1996	00:23:00			6.67536	12.1341
Lucy Spokes	Atlantic	CH127		11	6	1996	00:18:00	52.1369	-12.7599	11	6	1996	12:14:00			9.1363	14.9618
Lucy Spokes	Atlantic	CH127		11	6	1996	12:16:00	52.1078	-13.0418	12	6	1996	00:02:00			2.54033	7.1973
Lucy Spokes	Atlantic	CH127		12	6	1996	00:04:00	53.5101	-13.41	12	6	1996	12:16:00			1.41056	4.71875
Lucy Spokes	Atlantic	CH127		14	6	1996	00:02:00	52.9988	-11.4772	14	6	1996	12:11:00			29.4894	49.4905
Lucy Spokes	Atlantic	CH127		15	6	1996	00:07:00	54.4932	-10.9428	15	6	1996	12:16:00			45.0713	70.5595
Lucy Spokes	Atlantic	CH127		16	6	1996	00:03:00	54.1806	-11.3636	16	6	1996	11:59:00			112.731	178.178
Lucy Spokes	Atlantic	CH127		17	6	1996	00:09:00	54.0516	-11.2567	17	6	1996	12:16:00			48.1495	82.2432
Lucy Spokes	Atlantic	CH127		19	6	1996	00:22:00	52.2866	-11.6899	19	6	1996	12:10:00			140.215	319.182
Lucy Spokes	Atlantic	CH127		19	6	1996	12:14:00	52.2633	-11.4461	20	6	1996	00:03:00			65.9609	129.519
Lucy Spokes	Atlantic	CH127		20	6	1996	00:05:00	52.4207	-11.3267	20	6	1996	12:04:00			157.725	286.827
Lucy Spokes	Atlantic	CH127		21	6	1996	00:04:00	52.5136	-11.2049	21	6	1996	12:04:00			4.42285	5.42713
Lucy Spokes	Atlantic	CH127		22	6	1996	00:02:00	53.7919	-12.723	22	6	1996	12:03:00			2.59537	3.49827
Lucy Spokes	Atlantic	CH127		23	6	1996	00:04:00	54.0555	-11.3559	23	6	1996	13:55:00			2.37399	5.58015
Lucy Spokes	Atlantic	CH127		24	6	1996	00:02:00	52.6727	-11.0291	24	6	1996	12:02:00			6.03887	6.0071
Lucy Spokes	Atlantic	CH127		25	6	1996	00:03:00	52.493	-11.7536	25	6	1996	13:56:00			14.7603	10.3049
Lucy Spokes	Atlantic	CH127		26	6	1996	00:02:00	53.3304	-11.2002	26	6	1996	12:31:00			3.70532	3.79939
Lucy Spokes	Atlantic	CH127		27	6	1996	00:04:00	53.2318	-11.135	27	6	1996	12:09:00			5.78861	5.9827
Lucy Spokes	Atlantic	CH127		27	6	1996	12:10:00	53.0834	-11.1966	28	6	1996	00:01:00			8.25245	6.61243
Lucy Spokes	Atlantic	CH127		28	6	1996	00:02:00	54.0539	-11.7754	28	6	1996	14:59:00			6.42721	4.09523
Lucy Spokes	Atlantic	CH127		28	6	1996	14:59:00	54.064	-12.0725	29	6	1996	00:01:00			1.67684	3.23047
Lucy Spokes	Atlantic	CH127		29	6	1996	00:02:00	54.1422	-12.2264	29	6	1996	12:03:00			3.31859	4.34496
Lucy Spokes	Atlantic	CH127		30	6	1996	00:00:00	53.6544	-12.5358	30	6	1996	12:02:00			3.3373	5.13438
Lucy Spokes	Atlantic	CH127		1	7	1996	00:02:00	53.6375	-12.5092	1	7	1996	12:02:00			2.91018	4.66695
Lucy Spokes	Atlantic	CH127		2	7	1996	00:02:00	52.2272	-11.7679	2	7	1996	12:05:00			5.9598	10.4063
Lucy Spokes	Atlantic	CH133	HV3	14	5	1997	16:05:00	52.505	-12.7432	15	5	1997	08:55:00			5.49369	4.97891
Lucy Spokes	Atlantic	CH133	HV4	16	5	1997	08:10:00	53.3996	-10.2796	16	5	1997	13:55:00			105.497	50.6292
Lucy Spokes	Atlantic	CH133	HV4a	16	5	1997	14:06:00	53.3987	-10.287	16	5	1997	20:28:00			69.5335	120.061
Lucy Spokes	Atlantic	CH133	HV5	17	5	1997	09:58:00	53.877	-10.8234	17	5	1997	15:58:00			186.924	308.424
Lucy Spokes	Atlantic	CH133	HV5a	17	5	1997	16:03:00	53.8457	-10.7156	17	5	1997	21:58:00			153.689	245.33
Lucy Spokes	Atlantic	CH133	HV6	17	5	1997	22:28:00	53.8867	-10.7707	18	5	1997	08:07:00			73.6095	210.244
Lucy Spokes	Atlantic	CH133	HV7	18	5	1997	20:17:00	55.0003	-9.9997	19	5	1997	07:56:00			20.2247	61.3571
Lucy Spokes	Atlantic	CH133	HV8	19	5	1997	08:10:00	54.9241	-9.9819	19	5	1997	19:47:00			60.3398	123.486
Lucy Spokes	Atlantic	CH133	HV9	19	5	1997	20:37:00	54.8574	-9.981	20	5	1997	08:14:00			34.3505	40.6496
Lucy Spokes	Atlantic	CH133	HV10	22	5	1997	11:20:00	53.3286	-11.2377	22	5	1997	16:51:00			54.2184	67.1698
Lucy Spokes	Atlantic	CH133	HV10a	22	5	1997	17:01:00	53.3371	-11.1612	22	5	1997	22:48:00			62.256	95.7656
Lucy Spokes	Atlantic	CH133	HV11	22	5	1997	23:19:00	53.4207	-11.0808	23	5	1997	06:05:00			89.4801	116.03
Lucy Spokes	Atlantic	CH133	HV12	23	5	1997	10:10:00	53.6099	-11.4915	23	5	1997	15:47:00			95.26	117.695
Lucy Spokes	Atlantic	CH133	HV12a	23	5	1997	15:55:00	53.5664	-11.3623	23	5	1997	21:53:00			80.2177	122.248
Lucy Spokes	Atlantic	CH133	HV13	23	5	1997	22:19:00	53.5652	-11.1747	24	5	1997	08:05:00			97.9892	101.18
Lucy Spokes	Atlantic	CH133	HV13a	24	5	1997	15:26:00	52.716	-11.9069	24	5	1997	19:45:00			130.054	169.454
Lucy Spokes	Atlantic	CH133	HV14	24	5	1997	20:26:00	53.0025	-10.8094	25	5	1997	07:50:00			78.0465	102.249
Lucy Spokes	Atlantic	CH133	HV15	25	5	1997	08:21:00	53.1506	-10.6626	25	5	1997	19:47:00			95.5062	111.049
Lucy Spokes	Atlantic	CH133	HV16	25	5	1997	20:26:00	53.1445	-10.6658	26	5	1997	08:10:00			64.2388	82.7619
Lucy Spokes	Atlantic	CH133	HV17	26	5	1997	20:18:00	53.8346	-10.5776	27	5	1997	08:03:00			9.8958	7.939
Lucy Spokes	Atlantic	CH133	HV17a	27	5	1997	18:09:00	53.1788	-12.0159	27	5	1997	22:47:00			15.158	11.4529
Lucy Spokes	Atlantic	CH133	HV18	27	5	1997	23:07:00	53.3674	-11.7584	28	5	1997	10:36:00			36.2782	51.3428
Lucy Spokes	Atlantic	CH133	HV18a	28	5	1997	11:20:00	53.4115	-11.5568	28	5	1997	19:40:00			113.027	161.144
Lucy Spokes	Atlantic	CH133	HV19	28	5	1997	20:10:00	52.1912	-12.9069	29	5	1997	08:15:00			86.903	78.9069
Lucy Spokes	Atlantic	CH133	HV20	29	5	1997	10:11:00	51.9444	-12.2818	29	5	1997	19:37:00			149.009	112.616
Lucy Spokes	Atlantic	CH133	HV21	29	5	1997	23:32:00	51.5826	-12.6771	30	5	1997	07:57:00			169.342	142.865
Lucy Spokes	Atlantic	CH133	HV22	30	5	1997	08:26:00	51.4955	-12.5206	30	5	1997	19:58:00			166.093	174.56
http://saga.pmel.noaa.gov/data/PrePlot.php?cruise=ACE2	Atlantic	ACE-2		22	6	1997		37	-8.969							9.19281	6.0979
http://saga.pmel.noaa.gov/data/PrePlot.php?cruise=ACE2	Atlantic	ACE-2		23	6	1997		36.977	-11.764							3.70938	3.88048
http://saga.pmel.noaa.gov/data/PrePlot.php?cruise=ACE2	Atlantic	ACE-2		24	6	1997		35.275	-9.808							5.80598	15.5219
http://saga.pmel.noaa.gov/data/PrePlot.php?cruise=ACE2	Atlantic	ACE-2		25	6	1997		35.636	-9.411							7.74131	37.1418
http://saga.pmel.noaa.gov/data/PrePlot.php?cruise=ACE2	Atlantic	ACE-2		25	6	1997		35.817	-10.3							11.9345	25.5003
http://saga.pmel.noaa.gov/data/PrePlot.php?cruise=ACE2	Atlantic	ACE-2		25	6	1997		35.707	-9.956							9.99919	26.0547
http://saga.pmel.noaa.gov/data/PrePlot.php?cruise=ACE2	Atlantic	ACE-2		25	6	1997		35.514	-9.13							5.48343	66.5225
http://saga.pmel.noaa.gov/data/PrePlot.php?cruise=ACE2	Atlantic	ACE-2		25	6	1997		35.681	-8.996							8.5477	94.2403
http://saga.pmel.noaa.gov/data/PrePlot.php?cruise=ACE2	Atlantic	ACE-2		26	6	1997		36.133	-8.987							7.0962	49.3375
http://saga.pmel.noaa.gov/data/PrePlot.php?cruise=ACE2	Atlantic	ACE-2		27	6	1997		37.54	-11.634							4.51576	6.0979
http://saga.pmel.noaa.gov/data/PrePlot.php?cruise=ACE2	Atlantic	ACE-2		27	6	1997		38.229	-12.594							7.0962	9.97838
http://saga.pmel.noaa.gov/data/PrePlot.php?cruise=ACE2	Atlantic	ACE-2		28	6	1997		38.787	-13.248							2.90299	5.54354
http://saga.pmel.noaa.gov/data/PrePlot.php?cruise=ACE2	Atlantic	ACE-2		28	6	1997		39.506	-13.711							999	10.5327
http://saga.pmel.noaa.gov/data/PrePlot.php?cruise=ACE2	Atlantic	ACE-2		28	6	1997		40.378	-14.108							0.0645109	4.98919
http://saga.pmel.noaa.gov/data/PrePlot.php?cruise=ACE2	Atlantic	ACE-2		29	6	1997		39.671	-13.851							0.322555	6.65225
http://saga.pmel.noaa.gov/data/PrePlot.php?cruise=ACE2	Atlantic	ACE-2		29	6	1997		38.237	-14.735							2.25788	1.66306
http://saga.pmel.noaa.gov/data/PrePlot.php?cruise=ACE2	Atlantic	ACE-2		29	6	1997		37.267	-14.869							999	4.43484
http://saga.pmel.noaa.gov/data/PrePlot.php?cruise=ACE2	Atlantic	ACE-2		30	6	1997		37.19	-13.233							999	10.5327
http://saga.pmel.noaa.gov/data/PrePlot.php?cruise=ACE2	Atlantic	ACE-2		30	6	1997		37.153	-11.324							999	2.77177
http://saga.pmel.noaa.gov/data/PrePlot.php?cruise=ACE2	Atlantic	ACE-2		1	7	1997		37.001	-8.913							1.93533	4.43484
http://saga.pmel.noaa.gov/data/PrePlot.php?cruise=ACE2	Atlantic	ACE-2		1	7	1997		37.158	-9.053							1.19345	4.98919
http://saga.pmel.noaa.gov/data/PrePlot.php?cruise=ACE2	Atlantic	ACE-2		1	7	1997		37.158	-9.052							1.61277	6.0979
http://saga.pmel.noaa.gov/data/PrePlot.php?cruise=ACE2	Atlantic	ACE-2		2	7	1997		37.16	-9.053							3.40295	9.97838
http://saga.pmel.noaa.gov/data/PrePlot.php?cruise=ACE2	Atlantic	ACE-2		2	7	1997		37.159	-9.052							3.22555	12.7502
http://saga.pmel.noaa.gov/data/PrePlot.php?cruise=ACE2	Atlantic	ACE-2		2	7	1997		37.158	-9.052							1.93533	18.2937
http://saga.pmel.noaa.gov/data/PrePlot.php?cruise=ACE2	Atlantic	ACE-2		3	7	1997		36.921	-9.775							5.96726	7.20661
http://saga.pmel.noaa.gov/data/PrePlot.php?cruise=ACE2	Atlantic	ACE-2		3	7	1997		37.763	-10.204							3.06427	2.77177
http://saga.pmel.noaa.gov/data/PrePlot.php?cruise=ACE2	Atlantic	ACE-2		3	7	1997		38.958	-11.052							999	1.66306
http://saga.pmel.noaa.gov/data/PrePlot.php?cruise=ACE2	Atlantic	ACE-2		4	7	1997		39.708	-10.573							0.806387	3.88048
http://saga.pmel.noaa.gov/data/PrePlot.php?cruise=ACE2	Atlantic	ACE-2		4	7	1997		40.168	-11.287							0.161277	1.10871
http://saga.pmel.noaa.gov/data/PrePlot.php?cruise=ACE2	Atlantic	ACE-2		4	7	1997		39.089	-11.55							2.91912	3.32613
http://saga.pmel.noaa.gov/data/PrePlot.php?cruise=ACE2	Atlantic	ACE-2		5	7	1997		38.629	-11.766							999	0.60979
http://saga.pmel.noaa.gov/data/PrePlot.php?cruise=ACE2	Atlantic	ACE-2		5	7	1997		37.646	-10.935							6.11241	5.54354
http://saga.pmel.noaa.gov/data/PrePlot.php?cruise=ACE2	Atlantic	ACE-2		5	7	1997		36.368	-9.912							6.03177	39.3592
http://saga.pmel.noaa.gov/data/PrePlot.php?cruise=ACE2	Atlantic	ACE-2		6	7	1997		35.888	-9.333							5.48343	60.979
http://saga.pmel.noaa.gov/data/PrePlot.php?cruise=ACE2	Atlantic	ACE-2		6	7	1997		35.957	-9.525							8.27353	50.4463
http://saga.pmel.noaa.gov/data/PrePlot.php?cruise=ACE2	Atlantic	ACE-2		6	7	1997		36.245	-10.243							7.6768	60.979
http://saga.pmel.noaa.gov/data/PrePlot.php?cruise=ACE2	Atlantic	ACE-2		6	7	1997		36.665	-9.902							2.25788	79.2727
http://saga.pmel.noaa.gov/data/PrePlot.php?cruise=ACE2	Atlantic	ACE-2		7	7	1997		36.56	-9.522							1.29022	79.2727
http://saga.pmel.noaa.gov/data/PrePlot.php?cruise=ACE2	Atlantic	ACE-2		7	7	1997		35.853	-9.266							999	0.665225
http://saga.pmel.noaa.gov/data/PrePlot.php?cruise=ACE2	Atlantic	ACE-2		7	7	1997		35.063	-9.915							5.80598	74.2835
http://saga.pmel.noaa.gov/data/PrePlot.php?cruise=ACE2	Atlantic	ACE-2		7	7	1997		34.146	-10.386							10.8056	45.4571
http://saga.pmel.noaa.gov/data/PrePlot.php?cruise=ACE2	Atlantic	ACE-2		8	7	1997		33.973	-11.084							9.95081	45.4571
http://saga.pmel.noaa.gov/data/PrePlot.php?cruise=ACE2	Atlantic	ACE-2		8	7	1997		33.732	-12.3							13.7086	43.794
http://saga.pmel.noaa.gov/data/PrePlot.php?cruise=ACE2	Atlantic	ACE-2		8	7	1997		33.557	-13.344							9.67664	34.9243
http://saga.pmel.noaa.gov/data/PrePlot.php?cruise=ACE2	Atlantic	ACE-2		8	7	1997		33.537	-14.394							5.80598	42.1309
http://saga.pmel.noaa.gov/data/PrePlot.php?cruise=ACE2	Atlantic	ACE-2		9	7	1997		33.691	-14.914							8.5477	35.4787
http://saga.pmel.noaa.gov/data/PrePlot.php?cruise=ACE2	Atlantic	ACE-2		10	7	1997		30.074	-13.627							3.70938	77.6096
http://saga.pmel.noaa.gov/data/PrePlot.php?cruise=ACE2	Atlantic	ACE-2		10	7	1997		29.469	-12.702							5.80598	72.0661
http://saga.pmel.noaa.gov/data/PrePlot.php?cruise=ACE2	Atlantic	ACE-2		10	7	1997		29.24	-12							999	88.6967
http://saga.pmel.noaa.gov/data/PrePlot.php?cruise=ACE2	Atlantic	ACE-2		11	7	1997		29.422	-11.776							2.41916	94.2403
http://saga.pmel.noaa.gov/data/PrePlot.php?cruise=ACE2	Atlantic	ACE-2		11	7	1997		29.985	-11.368							4.83832	99.7838
http://saga.pmel.noaa.gov/data/PrePlot.php?cruise=ACE2	Atlantic	ACE-2		11	7	1997		30.479	-11.134							4.46738	116.414
http://saga.pmel.noaa.gov/data/PrePlot.php?cruise=ACE2	Atlantic	ACE-2		12	7	1997		31.022	-10.874							5.96726	18.8481
http://saga.pmel.noaa.gov/data/PrePlot.php?cruise=ACE2	Atlantic	ACE-2		12	7	1997		31.764	-10.674							4.9996	13.8589
http://saga.pmel.noaa.gov/data/PrePlot.php?cruise=ACE2	Atlantic	ACE-2		12	7	1997		32.796	-10.223							4.03193	23.8372
http://saga.pmel.noaa.gov/data/PrePlot.php?cruise=ACE2	Atlantic	ACE-2		13	7	1997		33.225	-9.604							5.06411	55.4354
http://saga.pmel.noaa.gov/data/PrePlot.php?cruise=ACE2	Atlantic	ACE-2		13	7	1997		33.851	-8.779							6.28982	60.979
http://saga.pmel.noaa.gov/data/PrePlot.php?cruise=ACE2	Atlantic	ACE-2		13	7	1997		34.297	-8.108							5.80598	60.979
http://saga.pmel.noaa.gov/data/PrePlot.php?cruise=ACE2	Atlantic	ACE-2		13	7	1997		35.062	-7.699							5.96726	88.6967
http://saga.pmel.noaa.gov/data/PrePlot.php?cruise=ACE2	Atlantic	ACE-2		14	7	1997		35.62	-7.911							3.06427	106.99
http://saga.pmel.noaa.gov/data/PrePlot.php?cruise=ACE2	Atlantic	ACE-2		14	7	1997		35.667	-8.787							4.67704	48.7832
http://saga.pmel.noaa.gov/data/PrePlot.php?cruise=ACE2	Atlantic	ACE-2		14	7	1997		36.273	-8.076							7.58003	88.6967
http://saga.pmel.noaa.gov/data/PrePlot.php?cruise=ACE2	Atlantic	ACE-2		14	7	1997		36.508	-8.628							7.85421	131.382
http://saga.pmel.noaa.gov/data/PrePlot.php?cruise=ACE2	Atlantic	ACE-2		15	7	1997		37.352	-9.706							12.2571	29.9351
http://saga.pmel.noaa.gov/data/PrePlot.php?cruise=ACE2	Atlantic	ACE-2		15	7	1997		37.769	-10.27							13.386	46.0114
http://saga.pmel.noaa.gov/data/PrePlot.php?cruise=ACE2	Atlantic	ACE-2		15	7	1997		38.432	-10.822							13.7086	72.0661
http://saga.pmel.noaa.gov/data/PrePlot.php?cruise=ACE2	Atlantic	ACE-2		16	7	1997		38.983	-11.069							8.06387	127.502
http://saga.pmel.noaa.gov/data/PrePlot.php?cruise=ACE2	Atlantic	ACE-2		16	7	1997		39.488	-11.615							8.22514	66.5225
http://saga.pmel.noaa.gov/data/PrePlot.php?cruise=ACE2	Atlantic	ACE-2		16	7	1997		40.013	-12.078							11.1281	19.9568
http://saga.pmel.noaa.gov/data/PrePlot.php?cruise=ACE2	Atlantic	ACE-2		17	7	1997		39.841	-11.456							7.25748	88.6967
http://saga.pmel.noaa.gov/data/PrePlot.php?cruise=ACE2	Atlantic	ACE-2		17	7	1997		39.899	-10.961							6.28982	54.8811
http://saga.pmel.noaa.gov/data/PrePlot.php?cruise=ACE2	Atlantic	ACE-2		18	7	1997		36.633	-9.034							24.1916	38.2505
http://saga.pmel.noaa.gov/data/PrePlot.php?cruise=ACE2	Atlantic	ACE-2		19	7	1997		36.972	-8.976							9.99919	66.5225
http://saga.pmel.noaa.gov/data/PrePlot.php?cruise=ACE2	Atlantic	ACE-2		19	7	1997		36.313	-8.982							15.6439	38.2505
http://saga.pmel.noaa.gov/data/PrePlot.php?cruise=ACE2	Atlantic	ACE-2		20	7	1997		36.505	-10.051							32.7393	41.5766
http://saga.pmel.noaa.gov/data/PrePlot.php?cruise=ACE2	Atlantic	ACE-2		20	7	1997		37.159	-10.795							22.2563	32.7069
http://saga.pmel.noaa.gov/data/PrePlot.php?cruise=ACE2	Atlantic	ACE-2		20	7	1997		37.79	-11.321							19.192	31.0438
http://saga.pmel.noaa.gov/data/PrePlot.php?cruise=ACE2	Atlantic	ACE-2		20	7	1997		38.607	-11.748							21.6112	31.0438
http://saga.pmel.noaa.gov/data/PrePlot.php?cruise=ACE2	Atlantic	ACE-2		21	7	1997		39.294	-11.632							22.5788	40.4679
http://saga.pmel.noaa.gov/data/PrePlot.php?cruise=ACE2	Atlantic	ACE-2		21	7	1997		39.936	-11.489							9.35408	34.37
http://saga.pmel.noaa.gov/data/PrePlot.php?cruise=ACE2	Atlantic	ACE-2		21	7	1997		40.208	-10.904							10.9346	36.5874
http://saga.pmel.noaa.gov/data/PrePlot.php?cruise=ACE2	Atlantic	ACE-2		22	7	1997		40.271	-10.218							14.4182	94.2403
http://saga.pmel.noaa.gov/data/PrePlot.php?cruise=ACE2	Atlantic	ACE-2		22	7	1997		40.299	-10.534							13.0635	133.045
http://saga.pmel.noaa.gov/data/PrePlot.php?cruise=ACE2	Atlantic	ACE-2		22	7	1997		40.714	-11.292							21.6112	149.676
http://saga.pmel.noaa.gov/data/PrePlot.php?cruise=ACE2	Atlantic	ACE-2		22	7	1997		40.178	-11.805							18.2243	116.414
http://saga.pmel.noaa.gov/data/PrePlot.php?cruise=ACE2	Atlantic	ACE-2		23	7	1997		40.299	-11.853							14.1601	83.1532
Lucy Spokes	Atlantic	NAE98	nae98a-1	14	6	1998	1998-06-14 04:30:00	59.5069	-21.1275							10.9818	27.6632
Lucy Spokes	Atlantic	NAE98	nae98a-2	15	6	1998	1998-06-15 04:25:00	59.4838	-21.0749							6.00917	7.9439
Lucy Spokes	Atlantic	NAE98	nae98a-4	17	6	1998	1998-06-17 04:30:00	59.559	-20.7679							5.12518	5.40934
Lucy Spokes	Atlantic	NAE98	nae98a-6	21	6	1998	1998-06-21 04:27:00	59.5709	-21.0571							6.07874	9.2363
Lucy Spokes	Atlantic	NAE98	nae98a-8	25	6	1998	1998-06-25 14:30:00	61.632	-20.4107							3.16181	6.71959
Lucy Spokes	Atlantic	NAE98	nae98a-10	28	6	1998	1998-06-28 16:06:00	59.8501	-20.6515							10.4353	8.97208
Lucy Spokes	Atlantic	NAE98	nae98a-12	29	6	1998	1998-06-29 19:58:00	59.7639	-21.1015							6.82701	5.7686
Lucy Spokes	Atlantic	NAE98	nae98a-14	1	7	1998	1998-07-01 14:40:00	60.3285	-20.2999							6.43476	5.2402
Lucy Spokes	Atlantic	NAE98	nae98a-15	4	7	1998	1998-07-04 05:37:00	59.3367	-21.7349							6.17328	5.70839
PMEL	Atlantic	AEROINDO99	1	18	1	1999		33.097	-69.646							3.42392	45.1799
PMEL	Atlantic	AEROINDO99	2	18	1	1999		32.772	-69.068							2.44174	44.0157
PMEL	Atlantic	AEROINDO99	3	18	1	1999		31.964	-67.802							1.62245	24.7242
PMEL	Atlantic	AEROINDO99	4	18	1	1999		31.23	-66.64							0.753165	4.71201
PMEL	Atlantic	AEROINDO99	5	19	1	1999		30.457	-65.433							0.437062	3.76961
PMEL	Atlantic	AEROINDO99	6	19	1	1999		30.072	-64.801							0.806387	1.7185
PMEL	Atlantic	AEROINDO99	7	19	1	1999		29.209	-63.457							1.00476	1.33045
PMEL	Atlantic	AEROINDO99	8	20	1	1999		27.574	-60.942							0.967664	1.38589
PMEL	Atlantic	AEROINDO99	9	20	1	1999		27.141	-60.253							1.08378	2.21742
PMEL	Atlantic	AEROINDO99	10	20	1	1999		26.251	-58.93							1.97242	2.21742
PMEL	Atlantic	AEROINDO99	11	20	1	1999		25.551	-57.861							1.74663	1.66306
PMEL	Atlantic	AEROINDO99	12	21	1	1999		24.654	-56.531							1.60793	1.99568
PMEL	Atlantic	AEROINDO99	13	21	1	1999		24.172	-55.796							1.18216	2.21742
PMEL	Atlantic	AEROINDO99	14	21	1	1999		23.445	-54.721							0.903153	0.886967
PMEL	Atlantic	AEROINDO99	15	21	1	1999		22.815	-53.797							2.01274	2.43916
PMEL	Atlantic	AEROINDO99	16	22	1	1999		22.067	-52.703							2.21595	2.10655
PMEL	Atlantic	AEROINDO99	17	22	1	1999		21.649	-52.079							1.74341	1.66306
PMEL	Atlantic	AEROINDO99	18	22	1	1999		20.521	-50.438							1.67567	1.10871
PMEL	Atlantic	AEROINDO99	19	23	1	1999		19.159	-48.469							1.7676	1.21958
PMEL	Atlantic	AEROINDO99	20	23	1	1999		17.821	-46.57							2.01597	1.10871
PMEL	Atlantic	AEROINDO99	21	24	1	1999		16.423	-44.58							2.31594	2.27285
PMEL	Atlantic	AEROINDO99	22	24	1	1999		15.124	-42.759							3.31909	5.21093
PMEL	Atlantic	AEROINDO99	23	25	1	1999		13.715	-40.776							3.69486	4.3794
PMEL	Atlantic	AEROINDO99	24	25	1	1999		12.609	-39.247							4.5964	4.15766
PMEL	Atlantic	AEROINDO99	25	25	1	1999		12.046	-38.458							4.0658	5.37724
PMEL	Atlantic	AEROINDO99	26	25	1	1999		11.295	-37.446							3.73034	4.60114
PMEL	Atlantic	AEROINDO99	27	26	1	1999		10.795	-36.738							3.87066	5.26637
PMEL	Atlantic	AEROINDO99	28	26	1	1999		10.039	-35.712							3.91581	4.43484
PMEL	Atlantic	AEROINDO99	29	26	1	1999		9.334	-34.722							3.87146	5.70985
PMEL	Atlantic	AEROINDO99	30	27	1	1999		8.458	-33.529							5.08024	6.48595
PMEL	Atlantic	AEROINDO99	31	27	1	1999		7.908	-32.784							6.22047	8.14901
PMEL	Atlantic	AEROINDO99	32	27	1	1999		7.131	-31.721							6.58818	9.92295
PMEL	Atlantic	AEROINDO99	33	27	1	1999		6.398	-30.714							6.57528	9.14685
PMEL	Atlantic	AEROINDO99	34	28	1	1999		5.36	-29.308							5.31409	5.93159
PMEL	Atlantic	AEROINDO99	35	28	1	1999		4.584	-28.238							2.90541	3.29841
PMEL	Atlantic	AEROINDO99	36	28	1	1999		3.936	-27.366							5.90356	9.86751
PMEL	Atlantic	AEROINDO99	37	28	1	1999		3.185	-26.446							6.3382	11.8077
PMEL	Atlantic	AEROINDO99	38	29	1	1999		2.158	-25.274							4.51657	7.09574
PMEL	Atlantic	AEROINDO99	39	29	1	1999		1.587	-24.61							4.48432	9.7012
PMEL	Atlantic	AEROINDO99	40	29	1	1999		0.798	-23.696							5.78824	16.1872
PMEL	Atlantic	AEROINDO99	41	29	1	1999		0.045	-22.852							7.03008	14.7458
PMEL	Atlantic	AEROINDO99	42	30	1	1999		-1.467	-21.125							7.67841	13.3599
PMEL	Atlantic	AEROINDO99	43	30	1	1999		-2.32	-20.135							7.99613	12.7502
PMEL	Atlantic	AEROINDO99	44	30	1	1999		-3.078	-19.283							6.16241	11.6414
PMEL	Atlantic	AEROINDO99	45	30	1	1999		-4.095	-18.115							3.46746	9.20228
PMEL	Atlantic	AEROINDO99	46	31	1	1999		-4.776	-17.33							1.1112	2.71634
PMEL	Atlantic	AEROINDO99	47	31	1	1999		-5.594	-16.406							0.899927	3.76961
PMEL	Atlantic	AEROINDO99	48	31	1	1999		-6.316	-15.561							0.791872	2.27285
PMEL	Atlantic	AEROINDO99	49	1	2	1999		-7.551	-14.14							0.388678	2.32829
PMEL	Atlantic	AEROINDO99	50	2	2	1999		-10.885	-10.286							0.675752	8.20445
PMEL	Atlantic	AEROINDO99	51	2	2	1999		-12.537	-8.354							0.537053	3.6033
PMEL	Atlantic	AEROINDO99	52	3	2	1999		-14.164	-6.449							1.26441	5.26637
PMEL	Atlantic	AEROINDO99	53	3	2	1999		-17.096	-2.953							1.68535	4.82288
PMEL	Atlantic	AEROINDO99	54	4	2	1999		-17.654	-2.293							2.10789	2.38372
PMEL	Atlantic	AEROINDO99	55	4	2	1999		-18.504	-1.261							1.99339	2.38372
PMEL	Atlantic	AEROINDO99	56	4	2	1999		-19.204	-0.422							1.51601	1.60763
PMEL	Atlantic	AEROINDO99	57	4	2	1999		-20.126	0.703							1.39666	1.82937
PMEL	Atlantic	AEROINDO99	58	5	2	1999		-20.719	1.428							1.20313	2.10655
PMEL	Atlantic	AEROINDO99	59	5	2	1999		-21.487	2.372							0.682203	1.49676
PMEL	Atlantic	AEROINDO99	60	5	2	1999		-22.243	3.305							1.28699	2.10655
PMEL	Atlantic	AEROINDO99	61	5	2	1999		-23.146	4.421							2.21111	2.60547
PMEL	Atlantic	AEROINDO99	62	6	2	1999		-23.694	5.077							2.44174	2.27285
PMEL	Atlantic	AEROINDO99	63	6	2	1999		-24.432	6.026							2.13692	1.60763
PMEL	Atlantic	AEROINDO99	64	6	2	1999		-25.112	6.879							2.04177	2.27285
PMEL	Atlantic	AEROINDO99	65	6	2	1999		-25.888	7.867							1.68051	1.94024
PMEL	Atlantic	AEROINDO99	66	7	2	1999		-26.555	8.69							1.3257	1.99568
PMEL	Atlantic	AEROINDO99	67	7	2	1999		-27.178	9.518							1.03217	1.94024
PMEL	Atlantic	AEROINDO99	68	7	2	1999		-27.946	10.507							1.25151	2.43916
PMEL	Atlantic	AEROINDO99	69	7	2	1999		-28.838	11.662							2.51593	1.66306
PMEL	Atlantic	AEROINDO99	70	8	2	1999		-29.341	12.318							2.42884	2.43916
PMEL	Atlantic	AEROINDO99	71	8	2	1999		-30.062	13.277							2.17402	1.7185
PMEL	Atlantic	AEROINDO99	72	8	2	1999		-30.757	14.2							1.97565	1.66306
PMEL	Atlantic	AEROINDO99	73	8	2	1999		-31.643	15.37							2.42239	1.60763
PMEL	Atlantic	AEROINDO99	74	9	2	1999		-32.154	16.019							2.24659	2.05111
Aki Virkkula	Atlantic	Akademic Fedorov	HV-O-1	8	11	1999		50.3833	-0.666667							10.0844	13.9659
Aki Virkkula	Atlantic	Akademic Fedorov	HV-O-2	9	11	1999		46.7149	-7.22315							10.0997	31.2889
Aki Virkkula	Atlantic	Akademic Fedorov	HV-O-3	10	11	1999		41.4333	-10.8833							7.12839	17.9084
Aki Virkkula	Atlantic	Akademic Fedorov	HV-O-4	11	11	1999		35.9289	-13.0358							7.46673	6.40471
Aki Virkkula	Atlantic	Akademic Fedorov	HV-O-5	12	11	1999		30.4687	-15.034							4.88111	16.6468
Aki Virkkula	Atlantic	Akademic Fedorov	HV-O-6	13	11	1999		24.4333	-17.3333							4.76421	9.61315
Aki Virkkula	Atlantic	Akademic Fedorov	HV-O-7	14	11	1999		19.3	-17.9833							6.90281	7.72019
Aki Virkkula	Atlantic	Akademic Fedorov	HV-O-8	15	11	1999		13.6333	-17.9833							10.7239	9.69636
Aki Virkkula	Atlantic	Akademic Fedorov	HV-O-9	16	11	1999		8.4	-16.8833							4.97155	11.0916
Aki Virkkula	Atlantic	Akademic Fedorov	HV-O-10	17	11	1999		4.1	-14.7667							3.51217	7.30745
Aki Virkkula	Atlantic	Akademic Fedorov	HV-O-11	18	11	1999		0.5	-11.85							1.90769	4.98676
Aki Virkkula	Atlantic	Akademic Fedorov	HV-O-12	19	11	1999		-3.83333	-8.26667							3.69404	6.43311
Aki Virkkula	Atlantic	Akademic Fedorov	HV-O-13	20	11	1999		-8.475	-4.41667							2.8907	2.78453
Aki Virkkula	Atlantic	Akademic Fedorov	HV-O-14	21	11	1999		-12.9667	-0.633333							1.23609	2.81456
Aki Virkkula	Atlantic	Akademic Fedorov	HV-O-15	22	11	1999		-17.6667	3.4							0.928125	2.42735
Aki Virkkula	Atlantic	Akademic Fedorov	HV-O-16	23	11	1999		-22.2983	7.45							1.6193	1.44157
Aki Virkkula	Atlantic	Akademic Fedorov	HV-O-17	24	11	1999		-26.2333	11.0167							1.66767	1.08603
Aki Virkkula	Atlantic	Akademic Fedorov	HV-O-18	25	11	1999		-33.8583	18.3167							3.90808	0.898926
Aki Virkkula	Atlantic	Akademic Fedorov	HV-O-19	26	11	1999		-38.5633	13.865							0.403299	1.01607
Aki Virkkula	Atlantic	Akademic Fedorov	HV-O-20	27	11	1999		-44.4333	12.2333							0.397077	1.04985
Aki Virkkula	Atlantic	Akademic Fedorov	HV-O-21	28	11	1999		-50.1167	10.9667							0.307067	0.559686
Aki Virkkula	Atlantic	Akademic Fedorov	HV-O-22	29	11	1999		-52.8667	7.01667							0.467826	0.601367
Aki Virkkula	Atlantic	Akademic Fedorov	HV-O-23	30	11	1999		-66	3.73333							0.553628	1.38096
Alex Baker	Atlantic	ANT18-1	ai01	4	10	2000		38.458	-12.374							25.7382	999
Alex Baker	Atlantic	ANT18-1	ai02	5	10	2000		30.925	-14.604							63.9385	999
Alex Baker	Atlantic	ANT18-1	ai05	10	10	2000		21.2	-20.7					16.1	-19.8	60.3246	999
Alex Baker	Atlantic	ANT18-1	ai06	11	10	2000		15.9	-19.7					10.6	-18.6	50.6256	999
Alex Baker	Atlantic	ANT18-1	ai07	12	10	2000		10.4	-18.6					6	-15.3	16.641	999
Alex Baker	Atlantic	ANT18-1	ai08	13	10	2000		5.7	-15.1					1.6	-11.7	11.5721	999
Alex Baker	Atlantic	ANT18-1	ai09	14	10	2000		1.4	-11.6					-2.8	-8.2	8.07536	999
Alex Baker	Atlantic	ANT18-1	ai10	15	10	2000		-3.1	-8					-6.7	-5.1	16.9384	999
Alex Baker	Atlantic	ANT18-1	ai11	16	10	2000		-6.9	-4.9					-11.4	-1.3	24.5377	999
Alex Baker	Atlantic	ANT18-1	ai12	17	10	2000		-11.5	-1.2					-15.6	2.2	19.4141	999
Alex Baker	Atlantic	ANT18-1	ai13	18	10	2000		-15.8	2.3					-19.6	5.5	35.4007	999
Alex Baker	Atlantic	JCR	i01	12	9	2001		48.641	-6.303					44.472	-9.515	28.402	29.8553
Alex Baker	Atlantic	JCR	i02	13	9	2001		44.278	-9.668					39.77	-12.937	13.6678	57.2098
Alex Baker	Atlantic	JCR	i03	14	9	2001		38.59	-13.753					35.125	-15.228	0.494588	1.70422
Alex Baker	Atlantic	JCR	i04	15	9	2001		34.926	-15.302					30.279	-16.955	9.73147	20.5459
Alex Baker	Atlantic	JCR	i05	16	9	2001		30.217	-16.983					25.29	-18.065	19.2006	15.3757
Alex Baker	Atlantic	JCR	i06	17	9	2001		25.104	-18.085					20.22	-18.498	46.6108	32.3802
Alex Baker	Atlantic	JCR	i07	18	9	2001		20.281	-18.497					15.657	-18.488	31.7446	21.8427
Alex Baker	Atlantic	JCR	i08	19	9	2001		15.455	-18.492					10.653	-18.22	18.4858	16.3131
Alex Baker	Atlantic	JCR	i09	20	9	2001		10.435	-18.178					6.042	-17.267	15.8457	14.0195
Alex Baker	Atlantic	JCR	i10	21	9	2001		5.793	-17.213					1.305	-16.303	10.7867	16.0423
Alex Baker	Atlantic	JCR	i11	22	9	2001		1.125	-16.265					-3.533	-15.318	24.5984	27.1074
Alex Baker	Atlantic	JCR	i12	23	9	2001		-3.753	-15.275					-7.833	-14.435	24.0568	15.4143
Alex Baker	Atlantic	JCR	i13	24	9	2001		-7.594	-14.26					-2.552	-12.632	17.9499	23.1287
Alex Baker	Atlantic	JCR	i15	5	10	2001		-12.585	-14.624					-9.225	-13.305	6.64888	8.03086
Alex Baker	Atlantic	JCR	i16	7	10	2001		-8.325	-14.997					-11.333	-19.082	19.4198	36.7483
Alex Baker	Atlantic	JCR	i17	8	10	2001		-11.43	-19.208					-16.268	-26.015	11.5304	23.0345
Alex Baker	Atlantic	JCR	i18	10	10	2001		-16.384	-26.197					-19.097	-29.981	3.25208	2.97597
Alex Baker	Atlantic	JCR	i19	11	10	2001		-19.223	-30.149					-22.132	-34.357	6.40056	4.57306
Alex Baker	Atlantic	JCR	i20	12	10	2001		-22.232	-34.507					-25.065	-38.677	3.95306	4.22876
Alex Baker	Atlantic	JCR	i21	13	10	2001		-25.067	-38.679					-26.344	-40.579	2.44775	2.74592
Alex Baker	Atlantic	JCR	i22	14	10	2001		-28.146	-43.312					-31.104	-47.899	6.56721	3.23166
Alex Baker	Atlantic	JCR	i23	15	10	2001		-31.234	-48.101					-34.092	-52.685	7.07305	8.48729
Alex Baker	Atlantic	JCR	i24	16	10	2001		-34.216	-52.888					-34.782	-53.817	7.21382	5.87343
Alex Baker	Atlantic	JCR	i25	19	10	2001		-35.018	-55.961					-42.48	-56.427	5.23502	8.73205
Alex Baker	Atlantic	JCR	i26	21	10	2001		-42.688	-56.455					-51.602	-57.627	4.76595	6.61763
http://saga.pmel.noaa.gov/data/download.php?cruise=NEAQS2002	Atlantic	NEAQS2002		14	7	2002		36.577	-74.196							2.89942	9.50873
http://saga.pmel.noaa.gov/data/download.php?cruise=NEAQS2002	Atlantic	NEAQS2002		15	7	2002		38.649	-72.909							2.8157	36.7993
http://saga.pmel.noaa.gov/data/download.php?cruise=NEAQS2002	Atlantic	NEAQS2002		15	7	2002		40.19	-73.239							0.81361	27.0813
http://saga.pmel.noaa.gov/data/download.php?cruise=NEAQS2002	Atlantic	NEAQS2002		16	7	2002		40.492	-73.875							0.42679	140.85
http://saga.pmel.noaa.gov/data/download.php?cruise=NEAQS2002	Atlantic	NEAQS2002		16	7	2002		40.495	-73.876							1.55091	215.375
http://saga.pmel.noaa.gov/data/download.php?cruise=NEAQS2002	Atlantic	NEAQS2002		17	7	2002		40.211	-73.404							0.74959	40.1248
http://saga.pmel.noaa.gov/data/download.php?cruise=NEAQS2002	Atlantic	NEAQS2002		17	7	2002		40.317	-73.825							0.310461	2.18733
http://saga.pmel.noaa.gov/data/download.php?cruise=NEAQS2002	Atlantic	NEAQS2002		17	7	2002		40.38	-71.841							0.463001	14.7884
http://saga.pmel.noaa.gov/data/download.php?cruise=NEAQS2002	Atlantic	NEAQS2002		18	7	2002		40.423	-69.594							0.279846	16.5223
http://saga.pmel.noaa.gov/data/download.php?cruise=NEAQS2002	Atlantic	NEAQS2002		18	7	2002		41.437	-69.387							0.557683	23.4502
http://saga.pmel.noaa.gov/data/download.php?cruise=NEAQS2002	Atlantic	NEAQS2002		18	7	2002		42.442	-70.874							0.690223	45.3389
http://saga.pmel.noaa.gov/data/download.php?cruise=NEAQS2002	Atlantic	NEAQS2002		19	7	2002		42.332	-70.713							0.989437	103.717
http://saga.pmel.noaa.gov/data/download.php?cruise=NEAQS2002	Atlantic	NEAQS2002		19	7	2002		42.353	-70.801							1.01979	219.458
http://saga.pmel.noaa.gov/data/download.php?cruise=NEAQS2002	Atlantic	NEAQS2002		19	7	2002		42.434	-70.822							0.934656	210.409
http://saga.pmel.noaa.gov/data/download.php?cruise=NEAQS2002	Atlantic	NEAQS2002		19	7	2002		42.359	-70.807							2.69427	166.123
http://saga.pmel.noaa.gov/data/download.php?cruise=NEAQS2002	Atlantic	NEAQS2002		21	7	2002		42.947	-70.724							0.354413	48.4046
http://saga.pmel.noaa.gov/data/download.php?cruise=NEAQS2002	Atlantic	NEAQS2002		21	7	2002		42.956	-70.717							0.192857	27.8104
http://saga.pmel.noaa.gov/data/download.php?cruise=NEAQS2002	Atlantic	NEAQS2002		22	7	2002		42.935	-70.53							0.679963	36.8233
http://saga.pmel.noaa.gov/data/download.php?cruise=NEAQS2002	Atlantic	NEAQS2002		22	7	2002		42.906	-70.647							2.43514	38.4013
http://saga.pmel.noaa.gov/data/download.php?cruise=NEAQS2002	Atlantic	NEAQS2002		22	7	2002		42.877	-70.661							1.60297	28.7
http://saga.pmel.noaa.gov/data/download.php?cruise=NEAQS2002	Atlantic	NEAQS2002		23	7	2002		42.822	-70.629							1.09149	131.985
http://saga.pmel.noaa.gov/data/download.php?cruise=NEAQS2002	Atlantic	NEAQS2002		23	7	2002		42.869	-70.401							1.69844	105.331
http://saga.pmel.noaa.gov/data/download.php?cruise=NEAQS2002	Atlantic	NEAQS2002		24	7	2002		42.813	-70.717							1.27285	244.627
http://saga.pmel.noaa.gov/data/download.php?cruise=NEAQS2002	Atlantic	NEAQS2002		25	7	2002		43.791	-69.349							0.271369	4.81233
http://saga.pmel.noaa.gov/data/download.php?cruise=NEAQS2002	Atlantic	NEAQS2002		26	7	2002		42.991	-70.479							0.440061	14.5284
http://saga.pmel.noaa.gov/data/download.php?cruise=NEAQS2002	Atlantic	NEAQS2002		30	7	2002		42.522	-70.681							0.294303	30.5787
http://saga.pmel.noaa.gov/data/download.php?cruise=NEAQS2002	Atlantic	NEAQS2002		31	7	2002		42.25	-70.364							0.342522	182.939
http://saga.pmel.noaa.gov/data/download.php?cruise=NEAQS2002	Atlantic	NEAQS2002		31	7	2002		42.304	-70.692							0.514077	67.9618
http://saga.pmel.noaa.gov/data/download.php?cruise=NEAQS2002	Atlantic	NEAQS2002		31	7	2002		42.418	-70.664							0.331611	27.3628
http://saga.pmel.noaa.gov/data/download.php?cruise=NEAQS2002	Atlantic	NEAQS2002		1	8	2002		42.506	-70.703							0.267264	36.0754
http://saga.pmel.noaa.gov/data/download.php?cruise=NEAQS2002	Atlantic	NEAQS2002		1	8	2002		42.32	-70.789							0.144592	59.6164
http://saga.pmel.noaa.gov/data/download.php?cruise=NEAQS2002	Atlantic	NEAQS2002		2	8	2002		42.994	-70.655							0.295402	26.2536
http://saga.pmel.noaa.gov/data/download.php?cruise=NEAQS2002	Atlantic	NEAQS2002		2	8	2002		42.983	-70.688							0.507424	12.4864
http://saga.pmel.noaa.gov/data/download.php?cruise=NEAQS2002	Atlantic	NEAQS2002		2	8	2002		42.84	-70.492							1.16658	13.5621
http://saga.pmel.noaa.gov/data/download.php?cruise=NEAQS2002	Atlantic	NEAQS2002		3	8	2002		42.884	-70.548							0.51393	31.5067
http://saga.pmel.noaa.gov/data/download.php?cruise=NEAQS2002	Atlantic	NEAQS2002		4	8	2002		42.95	-70.719							0.412969	63.8705
http://saga.pmel.noaa.gov/data/download.php?cruise=NEAQS2002	Atlantic	NEAQS2002		4	8	2002		42.947	-70.589							0.459281	87.8214
http://saga.pmel.noaa.gov/data/download.php?cruise=NEAQS2002	Atlantic	NEAQS2002		4	8	2002		42.656	-69.859							0.372037	112.359
http://saga.pmel.noaa.gov/data/download.php?cruise=NEAQS2002	Atlantic	NEAQS2002		5	8	2002		42.923	-70.675							0.669366	83.4057
http://saga.pmel.noaa.gov/data/download.php?cruise=NEAQS2002	Atlantic	NEAQS2002		5	8	2002		42.844	-70.725							0.949832	140.355
http://saga.pmel.noaa.gov/data/download.php?cruise=NEAQS2002	Atlantic	NEAQS2002		6	8	2002		42.814	-70.64							0.870869	197.964
http://saga.pmel.noaa.gov/data/download.php?cruise=NEAQS2002	Atlantic	NEAQS2002		6	8	2002		42.809	-70.663							0.564671	196.421
http://saga.pmel.noaa.gov/data/download.php?cruise=NEAQS2002	Atlantic	NEAQS2002		7	8	2002		40.048	-69.868							2.23637	5.09495
http://saga.pmel.noaa.gov/data/download.php?cruise=NEAQS2002	Atlantic	NEAQS2002		8	8	2002		39.336	-72.088							1.18878	6.44055
http://saga.pmel.noaa.gov/data/download.php?cruise=NEAQS2002	Atlantic	NEAQS2002		8	8	2002		37.671	-75.07							0.331035	17.3488
http://saga.pmel.noaa.gov/data/download.php?cruise=NEAQS2002	Atlantic	NEAQS2002		9	8	2002		36.817	-75.843							0.34472	24.5471
http://saga.pmel.noaa.gov/data/download.php?cruise=NEAQS2002	Atlantic	NEAQS2002		9	8	2002		36.822	-75.839							0.229628	27.442
Alex Baker	Atlantic	PEL	MI03	5	10	2002		35.05	-23.84					31.95	-21.46	27.042	40.3251
Alex Baker	Atlantic	PEL	MI04	6	10	2002		31.95	-21.46					30	-20	60.1643	75.3003
Alex Baker	Atlantic	PEL	MI05	7	10	2002		30	-20					31.67	-20	18.063	17.4323
Alex Baker	Atlantic	PEL	MI06	8	10	2002		31.67	-20					31.7	-22	3.43044	4.32647
Alex Baker	Atlantic	PEL	MI07	9	10	2002		31.7	-22					31.62	-24	9.74546	4.97955
Alex Baker	Atlantic	PEL	MI08	10	10	2002		31.62	-24					25	-23.75	9.13693	2.6645
Alex Baker	Atlantic	PEL	MI09	13	10	2002		25	-23.75					25	-21.3	10.6573	3.70276
Alex Baker	Atlantic	PEL	MI10	14	10	2002		25	-21.3					25	-18.85	15.8654	4.00453
Alex Baker	Atlantic	PEL	MI11	15	10	2002		25	-18.85					27.15	-20	11.8825	3.65723
Alex Baker	Atlantic	PEL	MI13	20	10	2002		27.65	-25.4					25.7	-19	7.3252	1.54146
Alex Baker	Atlantic	PEL	MI14	22	10	2002		25.7	-19					30	-17.5	21.0571	2.83482
Alex Baker	Atlantic	PEL	MI15	24	10	2002		30	-17.5					32.08	-17.01	11.8478	2.00354
Alex Baker	Atlantic	M55	mi03	15	10	2002		11	-58.667					10.55	-53.733	8.7205	4.33871
Alex Baker	Atlantic	M55	mi04	17	10	2002		10.55	-53.733					10	-51.4	6.85591	4.38322
Alex Baker	Atlantic	M55	mi05	18	10	2002		10	-51.35					10	-48.05	3.99979	3.73629
Alex Baker	Atlantic	M55	mi06	19	10	2002		10	-48					10	-44.867	11.3354	15.4391
Alex Baker	Atlantic	M55	mi07	20	10	2002		10	-44.841					10	-41.733	11.8412	9.05269
Alex Baker	Atlantic	M55	mi08	21	10	2002		10	-41.617					10	-39	4.1831	3.74654
Alex Baker	Atlantic	M55	mi09	22	10	2002		10.017	-39					10.017	-36.233	7.15505	7.29653
Alex Baker	Atlantic	M55	mi10	23	10	2002		10.017	-36.233					10	-33.4	9.65976	7.70469
Alex Baker	Atlantic	M55	mi11	24	10	2002		10	-33.283					10	-30.283	16.8157	9.7793
Alex Baker	Atlantic	M55	mi12	25	10	2002		10	-30.283					10	-27.55	8.81747	5.6211
Alex Baker	Atlantic	M55	mi13	26	10	2002		10	-27.433					7	-26.45	7.28204	6.23353
Alex Baker	Atlantic	M55	mi14	27	10	2002		6.85	-26.45					3.233	-26.217	1.85903	2.58318
Alex Baker	Atlantic	M55	mi15	28	10	2002		3.117	-26.2					0	-26	6.91397	11.3205
Alex Baker	Atlantic	M55	mi16	29	10	2002		0	-26					0.017	-23.483	8.76944	8.74068
Alex Baker	Atlantic	M55	mi17	30	10	2002		0.1	-23.467					1.95	-23.5	7.46542	7.82495
Alex Baker	Atlantic	M55	mi19	1	11	2002		6.133	-24.183					8.233	-24.567	4.63332	6.13875
Alex Baker	Atlantic	M55	mi20	2	11	2002		8.35	-24.6					10.567	-24.783	27.268	8.27681
Alex Baker	Atlantic	M55	mi21	3	11	2002		10.617	-24.683					11	-21.667	22.4312	15.0516
Alex Baker	Atlantic	M55	mi22	4	11	2002		11	-21.65					11.517	-18.717	31.4112	34.1164
Alex Baker	Atlantic	M55	mi23	5	11	2002		11.567	-18.55					10.5	-16.95	42.2575	37.8068
Alex Baker	Atlantic	M55	mi24	6	11	2002		10.583	-17.05					11	-18.917	53.6963	31.677
Alex Baker	Atlantic	M55	mi25	7	11	2002		11	-19.033					11	-20.417	37.2764	17.3735
Alex Baker	Atlantic	M55	mi26	8	11	2002		11	-20.417					9.317	-19	59.5525	30.1211
Alex Baker	Atlantic	M55	mi27	9	11	2002		9.3	-19					7	-17.083	14.5981	12.7217
Alex Baker	Atlantic	M55	mi28	10	11	2002		6.9	-16.967					5.362	-13.843	8.77887	14.1839
Alex Baker	Atlantic	M55	mi29	11	11	2002		5.3	-13.667					4.05	-10.183	9.67691	13.2775
Alex Baker	Atlantic	M55	mi30	12	11	2002		4	-10.033					3.517	-5.9	8.23076	16.1607
Alex Baker	Atlantic	M55	mi31	13	11	2002		3.517	-5.75					3.583	-1.6	8.1018	11.249
Alex Baker	Atlantic	AMT12	I01	14	5	2003		-48.0727	-47.1272					-43.2	-46.3	2.62512	6.80765
Alex Baker	Atlantic	AMT12	I03	20	5	2003		-33.8448	-32.3641					-31.82	-29.7	1.96046	6.16676
Alex Baker	Atlantic	AMT12	I04	21	5	2003		-31.7407	-29.6549					-29.42	-26.77	2.95168	2.37805
Alex Baker	Atlantic	AMT12	I05	22	5	2003		-29.2737	-26.5779					-26.06	-25	4.13791	4.85905
Alex Baker	Atlantic	AMT12	I06	23	5	2003		-25.7143	-25.0056					-21.63	-25	2.32171	6.22647
Alex Baker	Atlantic	AMT12	I07	24	5	2003		-21.2607	-24.997					-17.78	-25	3.16885	3.66355
Alex Baker	Atlantic	AMT12	I08	25	5	2003		-17.229	-25.0008					-13.92	-25	7.88145	13.337
Alex Baker	Atlantic	AMT12	I09	26	5	2003		-13.7631	-24.9972					-9.6	-24.77	5.45692	13.4976
Alex Baker	Atlantic	AMT12	I12	29	5	2003		-2.0654	-25.0011					1.08	-26.63	8.68401	29.4768
Alex Baker	Atlantic	AMT12	I13	30	5	2003		1.44286	-25.8641					4.9	-27.89	19.4877	36.5423
Alex Baker	Atlantic	AMT12	I14	31	5	2003		5.12557	-28.0333							21.3276	37.3535
Alex Baker	Atlantic	AMT12	I15	1	6	2003		8.92611	-30.3013					12.24	-32.29	38.1658	73.5446
Alex Baker	Atlantic	AMT12	I16	2	6	2003		12.2354	-32.2862					14.43	-33.61	9.23011	22.4042
Alex Baker	Atlantic	AMT12	I17	3	6	2003		14.7164	-33.7883					18.04	-35.83	8.05634	18.0221
Alex Baker	Atlantic	AMT12	I18	4	6	2003		18.3775	-36.0424					21.41	-35.8	5.40563	11.7614
Alex Baker	Atlantic	AMT12	I19	5	6	2003		21.9595	-35.2008					24.33	-32.57	10.5223	16.38
Alex Baker	Atlantic	AMT12	I20	6	6	2003		24.424	-32.465					26.46	-30.16	12.2312	15.7519
Alex Baker	Atlantic	AMT12	I21	7	6	2003		26.6599	-29.9203					29.39	-26.79	8.93523	12.1438
Alex Baker	Atlantic	AMT12	I22	8	6	2003		29.9605	-26.1044					32.68	-22.87	7.87719	13.8135
Alex Baker	Atlantic	AMT12	I23	9	6	2003		32.938	-22.551					36.69	-20.82	16.53	25.0637
Alex Baker	Atlantic	AMT12	I24	10	6	2003		36.8881	-20.7873					40.23	-20.24	5.30766	4.09386
Alex Baker	Atlantic	AMT12	I25	11	6	2003		41.0168	-20.0951					45.65	-18.53	4.3166	7.74026
Alex Baker	Atlantic	AMT12	I26	12	6	2003		45.7588	-18.2157					48	-12	6.55192	6.79904
Clifton S. Buck, cliftonsbuck@gmail.com	Atlantic	33RO	1	20	6	2003	08:42:00	62.81	-20.0033	21	6	2003	10:11:00	61	-20.0033	10.2523	999
Clifton S. Buck, cliftonsbuck@gmail.com	Atlantic	33RO	2	21	6	2003	10:11:00	61	-20.0033	22	6	2003	08:26:00	59.1417	-19.9983	14.2193	999
Clifton S. Buck, cliftonsbuck@gmail.com	Atlantic	33RO	3	22	6	2003	08:26:00	59.1417	-19.9983	23	6	2003	08:27:00	57	-19.9983	13.1706	999
Clifton S. Buck, cliftonsbuck@gmail.com	Atlantic	33RO	4	23	6	2003	08:27:00	57	-19.9983	24	6	2003	09:12:00	54.5017	-20	3.9	999
Clifton S. Buck, cliftonsbuck@gmail.com	Atlantic	33RO	5	24	6	2003	09:12:00	54.5017	-20	25	6	2003	08:41:00	52.465	-20	3.9	999
Clifton S. Buck, cliftonsbuck@gmail.com	Atlantic	33RO	6	25	6	2003	08:41:00	52.465	-20	26	6	2003	11:13:00	50.03	-20	3.9	999
Clifton S. Buck, cliftonsbuck@gmail.com	Atlantic	33RO	7	26	6	2003	11:13:00	50.03	-20	27	6	2003	10:24:00	48.5567	-20	3.9	999
Clifton S. Buck, cliftonsbuck@gmail.com	Atlantic	33RO	8	27	6	2003	10:24:00	48.5567	-20	28	6	2003	11:21:00	47.1117	-20	3.9	999
Clifton S. Buck, cliftonsbuck@gmail.com	Atlantic	33RO	9	28	6	2003	11:21:00	47.1117	-20	29	6	2003	11:16:00	46.0033	-20	3.9	999
Clifton S. Buck, cliftonsbuck@gmail.com	Atlantic	33RO	10	29	6	2003	11:16:00	46.0033	-20	30	6	2003	09:56:00	44.5	-20	3.9	999
Clifton S. Buck, cliftonsbuck@gmail.com	Atlantic	33RO	12	1	7	2003	16:45:00	41.97	-20.0033	2	7	2003	11:18:00	40.5	-20	3.9	999
Clifton S. Buck, cliftonsbuck@gmail.com	Atlantic	33RO	13	2	7	2003	11:18:00	40.5	-20	3	7	2003	10:35:00	38.9533	-20	15.3351	999
Clifton S. Buck, cliftonsbuck@gmail.com	Atlantic	33RO	14	3	7	2003	10:35:00	38.9533	-20	4	7	2003	10:57:00	37.4867	-20	17.3584	999
Clifton S. Buck, cliftonsbuck@gmail.com	Atlantic	33RO	15	4	7	2003	10:57:00	37.4867	-20	5	7	2003	09:07:00	36	-20	19.385	999
Clifton S. Buck, cliftonsbuck@gmail.com	Atlantic	33RO	16	5	7	2003	09:07:00	36	-20	6	7	2003	12:14:00	34.2283	-20.995	18.401	999
Clifton S. Buck, cliftonsbuck@gmail.com	Atlantic	33RO	17	6	7	2003	12:14:00	34.2283	-20.995	7	7	2003	13:27:00	32.5	-21.9683	11.761	999
Clifton S. Buck, cliftonsbuck@gmail.com	Atlantic	33RO	18	7	7	2003	13:27:00	32.5	-21.9683	8	7	2003	10:06:00	31.1167	-22.7483	24.0334	999
Clifton S. Buck, cliftonsbuck@gmail.com	Atlantic	33RO	19	8	7	2003	10:06:00	31.1167	-22.7483	9	7	2003	12:31:00	30.685	-21.6983	18.7637	999
Clifton S. Buck, cliftonsbuck@gmail.com	Atlantic	33RO	20	9	7	2003	12:31:00	30.685	-21.6983	16	7	2003	08:11:00	30.9367	-21.0817	17.5372	999
Clifton S. Buck, cliftonsbuck@gmail.com	Atlantic	33RO	21	16	7	2003	08:11:00	30.9367	-21.0817	17	7	2003	08:44:00	29.0983	-23.8817	13.3201	999
Clifton S. Buck, cliftonsbuck@gmail.com	Atlantic	33RO	22	17	7	2003	08:44:00	29.0983	-23.8817	18	7	2003	09:43:00	27.5	-24.7817	19.2372	999
Clifton S. Buck, cliftonsbuck@gmail.com	Atlantic	33RO	23	18	7	2003	09:43:00	27.5	-24.7817	19	7	2003	08:52:00	26	-25.625	25.2643	999
Clifton S. Buck, cliftonsbuck@gmail.com	Atlantic	33RO	24	19	7	2003	08:52:00	26	-25.625	20	7	2003	10:14:00	24.445	-26.4983	22.2945	999
Clifton S. Buck, cliftonsbuck@gmail.com	Atlantic	33RO	25	20	7	2003	10:14:00	24.445	-26.4983	21	7	2003	09:57:00	22.9533	-27.34	22.7696	999
Clifton S. Buck, cliftonsbuck@gmail.com	Atlantic	33RO	26	21	7	2003	09:57:00	22.9533	-27.34	22	7	2003	11:15:00	21.0617	-28.4017	25.4377	999
Clifton S. Buck, cliftonsbuck@gmail.com	Atlantic	33RO	27	22	7	2003	11:15:00	21.0617	-28.4017	23	7	2003	10:05:00	19.53	-29.0017	34.9831	999
Clifton S. Buck, cliftonsbuck@gmail.com	Atlantic	33RO	28	23	7	2003	10:05:00	19.53	-29.0017	24	7	2003	10:58:00	17.9983	-28.9983	21.1095	999
Clifton S. Buck, cliftonsbuck@gmail.com	Atlantic	33RO	29	24	7	2003	10:58:00	17.9983	-28.9983	25	7	2003	11:55:00	16.3283	-29	25.12	999
Clifton S. Buck, cliftonsbuck@gmail.com	Atlantic	33RO	30	25	7	2003	11:55:00	16.3283	-29	26	7	2003	09:42:00	15	-29	27.495	999
Clifton S. Buck, cliftonsbuck@gmail.com	Atlantic	33RO	31	26	7	2003	09:42:00	15	-29	27	7	2003	10:43:00	13.365	-29	27.0804	999
Clifton S. Buck, cliftonsbuck@gmail.com	Atlantic	33RO	32	27	7	2003	10:43:00	13.365	-29	28	7	2003	11:14:00	11.655	-29	12.8076	999
Clifton S. Buck, cliftonsbuck@gmail.com	Atlantic	33RO	33	28	7	2003	11:14:00	11.655	-29	29	7	2003	12:17:00	10	-28.4983	10.0154	999
Clifton S. Buck, cliftonsbuck@gmail.com	Atlantic	33RO	34	29	7	2003	12:17:00	10	-28.4983	30	7	2003	13:59:00	8.665	-27.8283	3.9	999
Clifton S. Buck, cliftonsbuck@gmail.com	Atlantic	33RO	35	30	7	2003	13:59:00	8.665	-27.8283	31	7	2003	10:26:00	7.445	-27.2233	3.9	999
Clifton S. Buck, cliftonsbuck@gmail.com	Atlantic	33RO	36	31	7	2003	10:26:00	7.445	-27.2233	1	7	2003	10:59:00	5.67333	-26.3367	25.4442	999
Clifton S. Buck, cliftonsbuck@gmail.com	Atlantic	33RO	37	1	8	2003	10:59:00	5.67333	-26.3367	2	8	2003	10:33:00	3.99333	-25.5033	26.4807	999
Clifton S. Buck, cliftonsbuck@gmail.com	Atlantic	33RO	38	2	8	2003	10:33:00	3.99333	-25.5033	3	8	2003	12:22:00	2.33333	-25	35.9627	999
Clifton S. Buck, cliftonsbuck@gmail.com	Atlantic	33RO	39	3	8	2003	12:22:00	2.33333	-25	4	8	2003	12:40:00	0.965	-25	31.8683	999
Clifton S. Buck, cliftonsbuck@gmail.com	Atlantic	33RO	40	4	8	2003	12:40:00	0.965	-25	5	8	2003	10:06:00	-0.36	-25.0033	28.2398	999
Clifton S. Buck, cliftonsbuck@gmail.com	Atlantic	33RO	41	5	8	2003	10:06:00	-0.36	-25.0033	6	8	2003	12:46:00	-2	-25	17.8512	999
Clifton S. Buck, cliftonsbuck@gmail.com	Atlantic	33RO	42	6	8	2003	12:46:00	-2	-25	7	8	2003	12:04:00	-3	-25.0017	14.5375	999
Clifton S. Buck, cliftonsbuck@gmail.com	Atlantic	33RO	43	7	8	2003	12:04:00	-3	-25.0017	8	8	2003	09:02:00	-4.5	-25	14.7329	999
Alex Baker	Atlantic	AMT13	I02	14	9	2003		47.967	-11.633					46.683	-17	67.6538	58.7505
Alex Baker	Atlantic	AMT13	I03	15	9	2003		46.683	-17.033					43.067	-19.617	43.0106	40.9493
Alex Baker	Atlantic	AMT13	I04	16	9	2003		43.05	-19.633					39.433	-21.55	34.0084	43.8709
Alex Baker	Atlantic	AMT13	I06	18	9	2003		37.183	-25.05					33.5	-22.117	10.7588	25.4189
Alex Baker	Atlantic	AMT13	I07	19	9	2003		33.45	-22.083					29.35	-20.9	10.6648	15.6522
Alex Baker	Atlantic	AMT13	I08	20	9	2003		29.35	-20.883					25.083	-20.75	10.6112	12.9772
Alex Baker	Atlantic	AMT13	I09	21	9	2003		25.083	-20.75					23.532	-20.678	33.2929	40.1213
Alex Baker	Atlantic	AMT13	I10	22	9	2003		20.8	-20.583					20.233	-17.75	35.6278	15.0789
Alex Baker	Atlantic	AMT13	I11	23	9	2003		20.217	-17.867					17.133	-19.017	57.8704	11.0422
Alex Baker	Atlantic	AMT13	I12	24	9	2003		17.15	-19.017					12.95	-20.867	9.11646	6.77771
Alex Baker	Atlantic	AMT13	I13	25	9	2003		12.517	-20.983					9	-22.133	14.6748	10.4621
Alex Baker	Atlantic	AMT13	I14	26	9	2003		9	-22.133					4.85	-23.45	9.30737	9.06294
Alex Baker	Atlantic	AMT13	I15	27	9	2003		4.85	-23.467					0.883	-24.717	5.27093	9.4662
Alex Baker	Atlantic	AMT13	I16	28	9	2003		0.867	-24.717					-3.833	-25	8.97284	14.7033
Alex Baker	Atlantic	AMT13	I17	29	9	2003		-3.833	-25					-7.833	-25	20.0179	17.7407
Alex Baker	Atlantic	AMT13	I18	30	9	2003		-7.833	-25					-11.933	-25	33.0695	25.69
Alex Baker	Atlantic	AMT13	I19	1	10	2003		-11.933	-25					-16.15	-24.983	25.9157	19.8522
Alex Baker	Atlantic	AMT13	I20	2	10	2003		-16.15	-25					-20.25	-25	12.3905	12.7172
Alex Baker	Atlantic	AMT13	I21	3	10	2003		-20.25	-25					-23.9	-25	0.694619	3.0172
Alex Baker	Atlantic	AMT13	I22	4	10	2003		-23.9	-25					-30.867	-28.433	1.63028	2.56775
Alex Baker	Atlantic	AMT13	I23	6	10	2003		-30.867	-28.45					-36.1	-34.95	1.62249	5.00683
Alex Baker	Atlantic	AMT13	I24	8	10	2003		-37.2	-36.383					-41.9	-42.75	2.30874	3.30377
Alex Pzsenny / Bill Keene	Atlantic	ANT21-1	BU01S	23	10	2003		50.7555	0.915	23	10	2003				54.6	69.3257
Alex Pzsenny / Bill Keene	Atlantic	ANT21-1	BU02S	23	10	2003		49.8508	-2.994	24	10	2003				37.5	24.6459
Alex Pzsenny / Bill Keene	Atlantic	ANT21-1	BU03S	24	10	2003		48.1123	-6.0642	24	10	2003				55.4082	20.6779
Alex Pzsenny / Bill Keene	Atlantic	ANT21-1	BU04S	24	10	2003		46.2938	-4.3423	25	10	2003				57.1	48.1941
Alex Pzsenny / Bill Keene	Atlantic	ANT21-1	BU05S	25	10	2003		45.9348	-4.4112	25	10	2003				37	28.4728
Alex Pzsenny / Bill Keene	Atlantic	ANT21-1	BU06S	25	10	2003		46.0247	-4.2928	26	10	2003				31.6	25.7777
Alex Pzsenny / Bill Keene	Atlantic	ANT21-1	BU07S	26	10	2003		45.2418	-5.836	26	10	2003				33.9	30.6568
Alex Pzsenny / Bill Keene	Atlantic	ANT21-1	BU08S	29	10	2003		31.8172	-14.3492	29	10	2003				15.5	18.5
Alex Pzsenny / Bill Keene	Atlantic	ANT21-1	BU09S	29	10	2003		29.3762	-15.0388	30	10	2003				21.7	19.0754
Alex Pzsenny / Bill Keene	Atlantic	ANT21-1	BU10S	30	10	2003		28.1245	-15.3555	30	10	2003				27.6	27.8
Alex Pzsenny / Bill Keene	Atlantic	ANT21-1	BU11S	30	10	2003		26.6708	-17.269	31	10	2003				24.5	16.8016
Alex Pzsenny / Bill Keene	Atlantic	ANT21-1	BU12S	31	10	2003		25.0995	-19.8427	31	10	2003				18.4	16.2
Alex Pzsenny / Bill Keene	Atlantic	ANT21-1	BU14S	1	11	2003		19.0913	-20.1603	1	11	2003				29.3	23.5
Alex Pzsenny / Bill Keene	Atlantic	ANT21-1	BU15S	1	11	2003		17.0037	-20.4958	2	11	2003				33.9	33.4991
Alex Pzsenny / Bill Keene	Atlantic	ANT21-1	BU16S	2	11	2003		14.0945	-20.8608	2	11	2003				23.3	999
Alex Pzsenny / Bill Keene	Atlantic	ANT21-1	BU17S	2	11	2003		11.3305	-20.2783	3	11	2003				26.3	19.3023
Alex Pzsenny / Bill Keene	Atlantic	ANT21-1	BU18S	3	11	2003		8.0412	-18.3507	4	11	2003				9.97	7.792
Alex Pzsenny / Bill Keene	Atlantic	ANT21-1	BU19S	4	11	2003		5.1262	-15.9103	4	11	2003				7.17	6.603
Alex Pzsenny / Bill Keene	Atlantic	ANT21-1	BU20S	4	11	2003		3.9493	-14.9292	5	11	2003				7.56	18.4797
Alex Pzsenny / Bill Keene	Atlantic	ANT21-1	BU21S	5	11	2003		1.4393	-12.8395	5	11	2003				14.7	17.6769
Alex Pzsenny / Bill Keene	Atlantic	ANT21-1	BU22S	5	11	2003		0.4367	-12.0057	6	11	2003				14.1	18.178
Alex Pzsenny / Bill Keene	Atlantic	ANT21-1	BU23S	6	11	2003		-1.5262	-10.3747	6	11	2003				14.9	17.713
Alex Pzsenny / Bill Keene	Atlantic	ANT21-1	BU24S	6	11	2003		-3.4005	-8.8133	7	11	2003				13.5	999
Alex Pzsenny / Bill Keene	Atlantic	ANT21-1	BU25S	7	11	2003		-5.381	-7.1617	7	11	2003				16.4	14.145
Alex Pzsenny / Bill Keene	Atlantic	ANT21-1	BU26S	7	11	2003		-7.2437	-5.6032	8	11	2003				7.17	8.4568
Alex Pzsenny / Bill Keene	Atlantic	ANT21-1	BU27S	8	11	2003		-9.1787	-3.9777	8	11	2003				5.86	8.4479
Alex Pzsenny / Bill Keene	Atlantic	ANT21-1	BU28S	8	11	2003		-11.0477	-2.3988	9	11	2003				9.82	13.7017
Alex Pzsenny / Bill Keene	Atlantic	ANT21-1	BU29S	9	11	2003		-12.9297	-0.799	9	11	2003				18.4	16.46
Alex Pzsenny / Bill Keene	Atlantic	ANT21-1	BU30S	9	11	2003		-14.6462	0.9057	10	11	2003				7.61	12.228
Alex Pzsenny / Bill Keene	Atlantic	ANT21-1	BU31S	10	11	2003		-16.4848	2.9335	10	11	2003				14	13.0086
Alex Baker	Atlantic	24N	MI01	7	4	2004		26.901	-79.163					27.014	-79.388	44.3627	42.3908
Alex Baker	Atlantic	24N	MI02	8	4	2004		26.043	-77.839					26.499	-76.682	43.5891	70.6044
Alex Baker	Atlantic	24N	MI03	9	4	2004		26.493	-76.43					26.502	-75.934	54.8632	109.621
Alex Baker	Atlantic	24N	MI04	10	4	2004		26.497	-75.899					26.517	-75.075	89.4476	182.811
Alex Baker	Atlantic	24N	MI05	11	4	2004		26.52	-75.074					26.501	-73.927	99.2063	82.7442
Alex Baker	Atlantic	24N	MI06	12	4	2004		26.5	-73.922					26.5	-72.486	42.795	30.0097
Alex Baker	Atlantic	24N	MI07	13	4	2004		26.499	-72.488					26.499	-70.998	31.5756	19.8558
Alex Baker	Atlantic	24N	MI08	14	4	2004		26.496	-70.996					25.366	-69.901	23.143	23.502
Alex Baker	Atlantic	24N	MI09	15	4	2004		25.351	-69.874					24.521	-68.364	38.0346	50.3537
Alex Baker	Atlantic	24N	MI10	16	4	2004		24.516	-68.311					24.495	-65.897	29.797	16.0855
Alex Baker	Atlantic	24N	MI11	17	4	2004		24.495	-65.829					24.508	-63.426	8.53511	1.76194
Alex Baker	Atlantic	24N	MI12	18	4	2004		24.506	-63.359					24.495	-61.475	4.11222	1.66224
Alex Baker	Atlantic	24N	MI13	19	4	2004		24.495	-61.409					24.499	-59.425	8.82114	2.16659
Alex Baker	Atlantic	24N	MI14	20	4	2004		24.5	-59.357					24.506	-56.977	7.23341	4.99857
Alex Baker	Atlantic	24N	MI15	21	4	2004		24.502	-56.906					24.498	-54.783	6.70699	8.48346
Alex Baker	Atlantic	24N	MI16	22	4	2004		24.495	-54.719					24.504	-52.639	6.75076	2.72878
Alex Baker	Atlantic	24N	MI17	23	4	2004		24.504	-52.637					24.503	-50.82	7.92019	2.17536
Alex Baker	Atlantic	24N	MI18	24	4	2004		24.501	-50.761					24.496	-48.773	5.36496	2.16862
Alex Baker	Atlantic	24N	MI19	25	4	2004		24.496	-48.773					24.499	-46.129	6.89035	2.06904
Alex Baker	Atlantic	24N	MI20	26	4	2004		24.5	-46.051					24.499	-43.841	19.7142	17.0363
Alex Baker	Atlantic	24N	MI21	27	4	2004		24.499	-43.841					24.521	-41.648	13.9643	13.3103
Alex Baker	Atlantic	24N	MI22	28	4	2004		24.519	-41.522					24.501	-39.023	13.1552	12.3366
Alex Baker	Atlantic	24N	MI23	29	4	2004		24.5	-38.96					24.492	-36.418	18.8952	2.13505
Alex Baker	Atlantic	24N	MI24	30	4	2004		24.497	-36.349					24.493	-33.902	9.1854	6.63644
Alex Baker	Atlantic	24N	MI25	1	5	2004		24.494	-33.848					24.505	-31.322	9.54292	8.16174
Alex Baker	Atlantic	24N	MI26	2	5	2004		24.505	-31.269					24.507	-28.822	9.88934	7.6255
Alex Baker	Atlantic	24N	MI27	3	5	2004		24.506	-28.735						-25.979	13.6583	1.66978
Alex Baker	Atlantic	24N	MI28	4	5	2004		24.501	-25.922					24.624	-23.184	20.4744	6.80823
Alex Baker	Atlantic	24N	MI29	5	5	2004		24.641	-23.118					25.455	-20.802	41.9645	25.6361
Alex Baker	Atlantic	24N	MI30	6	5	2004		25.453	-20.798					25.931	-19.481	40.6078	29.0169
Alex Baker	Atlantic	24N	MI31	7	5	2004		25.931	-19.48					26.759	-16.962	14.7584	15.4106
Alex Baker	Atlantic	24N	MI32	8	5	2004		26.78	-16.903					27.591	-14.332	23.6803	1.5785
Alex Baker	Atlantic	AMT14	I03	1	5	2004		-42.42	-43.48					-40.95	-41.42	1.77187	3.48337
Alex Baker	Atlantic	AMT14	I04	2	5	2004		-40.3	-40.53					-34.72	-33.2	0.706416	3.18809
Alex Baker	Atlantic	AMT14	I05	4	5	2004		-34.42	-32.82					-29.88	-27.25	0.853164	2.9674
Alex Baker	Atlantic	AMT14	I06	6	5	2004		-29.75	-27.08					-26.4	-24.98	1.38699	3.14645
Alex Baker	Atlantic	AMT14	I07	7	5	2004		-26	-25					-22.98	-25	1.08318	3.08206
Alex Baker	Atlantic	AMT14	I08	8	5	2004		-22.7	-25					-19.03	-24.98	1.1243	3.39337
Alex Baker	Atlantic	AMT14	I09	9	5	2004		-18.78	-25					-14.38	-24.98	2.09497	3.85276
Alex Baker	Atlantic	AMT14	I10	10	5	2004		-14.22	-25					-11.3	-24.98	2.28908	7.29332
Alex Baker	Atlantic	AMT14	I11	11	5	2004		-10.92	-25					-6.78	-24.98	7.46029	13.4199
Alex Baker	Atlantic	AMT14	I12	12	5	2004		-6.47	-24.98					-2.57	-25	12.737	13.7281
Alex Baker	Atlantic	AMT14	I13	13	5	2004		-2.18	-24.98					0.5	-25.18	7.42903	11.9022
Alex Baker	Atlantic	AMT14	I14	14	5	2004		0.63	-25.23					4.55	-26.73	11.194	14.6509
Alex Baker	Atlantic	AMT14	I15	15	5	2004		4.87	-26.85					8.53	-28.27	21.5826	14.9875
Alex Baker	Atlantic	AMT14	I16	16	5	2004		8.77	-28.35					11.85	-29.55	38.1328	18.1918
Alex Baker	Atlantic	AMT14	I17	17	5	2004		12.07	-29.62					15.9	-31.13	17.2334	15.9029
Alex Baker	Atlantic	AMT14	I18	18	5	2004		16.08	-31.2					19.95	-32.77	14.971	11.9455
Alex Baker	Atlantic	AMT14	I19	19	5	2004		20.18	-32.85					23.27	-34.13	8.18704	6.73964
Alex Baker	Atlantic	AMT14	I20	20	5	2004		23.43	-34.2					27.13	-35.75	8.517	5.57431
Alex Baker	Atlantic	AMT14	I21	21	5	2004		27.33	-35.85					29.83	-35.62	7.31456	5.84984
Alex Baker	Atlantic	AMT14	I22	22	5	2004		29.92	-35.45					31.9	-31.25	7.31383	7.74798
Alex Baker	Atlantic	AMT14	I23	23	5	2004		31.98	-31.08					34.18	-26.28	14.1921	17.519
Alex Baker	Atlantic	AMT14	I24	24	5	2004		34.38	-25.83					36.37	-21.48	55.5153	37.284
Alex Baker	Atlantic	AMT14	I25	25	5	2004		36.48	-21.3					39.15	-19.72	36.9739	29.9054
Alex Baker	Atlantic	AMT14	I26	26	5	2004		39.27	-19.68					43.28	-18.37	8.7411	9.60063
Alex Baker	Atlantic	AMT14	I27	29	5	2004		49.1	-13.63					49.28	-7.22	5.21598	8.98555
Alex Baker	Atlantic	AMT14	I28	30	5	2004		49.3	-6.23					50.48	0.92	54.2414	21.2115
Alex Baker	Atlantic	FEEP	TM01	1	5	2004		27.8	-22.62					27.92	-23.51	9.75938	13.8022
Alex Baker	Atlantic	FEEP	TM02	2	5	2004		27.81	-23.34					27.81	-23.34	11.5963	17.4204
Alex Baker	Atlantic	FEEP	TM03	3	5	2004		27.83	-21.46					27.79	-23.37	10.1878	13.2018
Alex Baker	Atlantic	FEEP	TM04	4	5	2004		27.79	-23.37					27.79	-23.31	22.9304	30.9069
Alex Baker	Atlantic	FEEP	TM05	8	5	2004		27.61	-23.23					27.65	-23.23	11.4418	10.6773
Alex Baker	Atlantic	FEEP	TM06	10	5	2004		27.67	-23.12					28.09	-19.8	16.576	20.0264
Alex Baker	Atlantic	FEEP	TM07	13	5	2004		28.09	-19.78					27.62	-23.1	30.5008	22.5987
Alex Baker	Atlantic	FEEP	TM08	15	5	2004		27.62	-23.04					27.55	-22.47	26.9444	22.9284
http://saga.pmel.noaa.gov/data/PrePlot.php?cruise=NEAQS2004	Atlantic	NEAQS2004		7	7	2004		42.4185	-70.6511							999	0.776096
http://saga.pmel.noaa.gov/data/PrePlot.php?cruise=NEAQS2004	Atlantic	NEAQS2004		8	7	2004		42.447	-70.7222							0.283848	72.1215
http://saga.pmel.noaa.gov/data/PrePlot.php?cruise=NEAQS2004	Atlantic	NEAQS2004		8	7	2004		42.3853	-70.5016							0.225788	64.1388
http://saga.pmel.noaa.gov/data/PrePlot.php?cruise=NEAQS2004	Atlantic	NEAQS2004		8	7	2004		42.5169	-70.5532							0.475768	38.6385
http://saga.pmel.noaa.gov/data/PrePlot.php?cruise=NEAQS2004	Atlantic	NEAQS2004		9	7	2004		42.5726	-70.4954							0.243529	30.3786
http://saga.pmel.noaa.gov/data/PrePlot.php?cruise=NEAQS2004	Atlantic	NEAQS2004		9	7	2004		43.0029	-70.5783							999	34.37
http://saga.pmel.noaa.gov/data/PrePlot.php?cruise=NEAQS2004	Atlantic	NEAQS2004		9	7	2004		43.1628	-69.6249							999	11.8632
http://saga.pmel.noaa.gov/data/PrePlot.php?cruise=NEAQS2004	Atlantic	NEAQS2004		10	7	2004		43.5861	-66.9809							999	19.0698
http://saga.pmel.noaa.gov/data/PrePlot.php?cruise=NEAQS2004	Atlantic	NEAQS2004		10	7	2004		43.7206	-66.1633							0.035481	23.8927
http://saga.pmel.noaa.gov/data/PrePlot.php?cruise=NEAQS2004	Atlantic	NEAQS2004		11	7	2004		43.4289	-66.5724							0.0451576	7.37291
http://saga.pmel.noaa.gov/data/PrePlot.php?cruise=NEAQS2004	Atlantic	NEAQS2004		11	7	2004		42.9224	-66.9588							0.0806387	15.9654
http://saga.pmel.noaa.gov/data/PrePlot.php?cruise=NEAQS2004	Atlantic	NEAQS2004		11	7	2004		41.8259	-69.1806							0.840255	16.1872
http://saga.pmel.noaa.gov/data/PrePlot.php?cruise=NEAQS2004	Atlantic	NEAQS2004		12	7	2004		42.6018	-70.1408							0.301589	48.7832
http://saga.pmel.noaa.gov/data/PrePlot.php?cruise=NEAQS2004	Atlantic	NEAQS2004		12	7	2004		42.2055	-70.4792							0.251593	54.2713
http://saga.pmel.noaa.gov/data/PrePlot.php?cruise=NEAQS2004	Atlantic	NEAQS2004		12	7	2004		42.4619	-70.6058							0.564471	60.4801
http://saga.pmel.noaa.gov/data/PrePlot.php?cruise=NEAQS2004	Atlantic	NEAQS2004		13	7	2004		42.359	-71.0348							1.73857	13.5262
http://saga.pmel.noaa.gov/data/PrePlot.php?cruise=NEAQS2004	Atlantic	NEAQS2004		13	7	2004		42.7351	-70.644							0.27901	17.2959
http://saga.pmel.noaa.gov/data/PrePlot.php?cruise=NEAQS2004	Atlantic	NEAQS2004		14	7	2004		42.713	-70.5113							0.474155	54.5485
http://saga.pmel.noaa.gov/data/PrePlot.php?cruise=NEAQS2004	Atlantic	NEAQS2004		14	7	2004		42.7862	-70.6882							0.561245	30.5449
http://saga.pmel.noaa.gov/data/PrePlot.php?cruise=NEAQS2004	Atlantic	NEAQS2004		14	7	2004		42.8878	-70.6066							0.890251	18.3491
http://saga.pmel.noaa.gov/data/PrePlot.php?cruise=NEAQS2004	Atlantic	NEAQS2004		15	7	2004		42.9044	-70.6041							1.74341	13.0273
http://saga.pmel.noaa.gov/data/PrePlot.php?cruise=NEAQS2004	Atlantic	NEAQS2004		15	7	2004		42.3998	-70.9003							3.4852	22.1187
http://saga.pmel.noaa.gov/data/PrePlot.php?cruise=NEAQS2004	Atlantic	NEAQS2004		16	7	2004		42.3826	-70.8595							2.92073	23.7264
http://saga.pmel.noaa.gov/data/PrePlot.php?cruise=NEAQS2004	Atlantic	NEAQS2004		17	7	2004		42.8865	-70.6078							0.653173	42.0755
http://saga.pmel.noaa.gov/data/PrePlot.php?cruise=NEAQS2004	Atlantic	NEAQS2004		17	7	2004		42.7373	-70.6998							1.53859	121.958
http://saga.pmel.noaa.gov/data/PrePlot.php?cruise=NEAQS2004	Atlantic	NEAQS2004		18	7	2004		42.6902	-70.4953							1.30473	89.9717
http://saga.pmel.noaa.gov/data/PrePlot.php?cruise=NEAQS2004	Atlantic	NEAQS2004		18	7	2004		43.1835	-70.3204							1.77405	58.3181
http://saga.pmel.noaa.gov/data/PrePlot.php?cruise=NEAQS2004	Atlantic	NEAQS2004		18	7	2004		42.7438	-68.8487							2.94815	72.8422
http://saga.pmel.noaa.gov/data/PrePlot.php?cruise=NEAQS2004	Atlantic	NEAQS2004		19	7	2004		43.1236	-69.5812							1.00476	59.704
http://saga.pmel.noaa.gov/data/PrePlot.php?cruise=NEAQS2004	Atlantic	NEAQS2004		19	7	2004		43.1644	-68.1935							2.21272	88.863
http://saga.pmel.noaa.gov/data/PrePlot.php?cruise=NEAQS2004	Atlantic	NEAQS2004		19	7	2004		43.5753	-68.0258							0.545117	98.4534
http://saga.pmel.noaa.gov/data/PrePlot.php?cruise=NEAQS2004	Atlantic	NEAQS2004		20	7	2004		44.1511	-67.3924							0.432223	72.3987
http://saga.pmel.noaa.gov/data/PrePlot.php?cruise=NEAQS2004	Atlantic	NEAQS2004		20	7	2004		44.1859	-67.0001							0.0661237	47.3419
http://saga.pmel.noaa.gov/data/PrePlot.php?cruise=NEAQS2004	Atlantic	NEAQS2004		20	7	2004		43.8211	-67.7307							0.369325	20.6774
http://saga.pmel.noaa.gov/data/PrePlot.php?cruise=NEAQS2004	Atlantic	NEAQS2004		21	7	2004		43.6184	-67.063							0.0322555	2.16198
http://saga.pmel.noaa.gov/data/PrePlot.php?cruise=NEAQS2004	Atlantic	NEAQS2004		22	7	2004		43.4136	-69.3356							0.0451577	12.9165
http://saga.pmel.noaa.gov/data/PrePlot.php?cruise=NEAQS2004	Atlantic	NEAQS2004		22	7	2004		43.2475	-70.0312							0.0822514	73.84
http://saga.pmel.noaa.gov/data/PrePlot.php?cruise=NEAQS2004	Atlantic	NEAQS2004		22	7	2004		42.9247	-70.59							0.79671	213.815
http://saga.pmel.noaa.gov/data/PrePlot.php?cruise=NEAQS2004	Atlantic	NEAQS2004		23	7	2004		42.4992	-70.7052							0.638658	159.765
http://saga.pmel.noaa.gov/data/PrePlot.php?cruise=NEAQS2004	Atlantic	NEAQS2004		23	7	2004		42.4575	-70.7352							999	53.218
http://saga.pmel.noaa.gov/data/PrePlot.php?cruise=NEAQS2004	Atlantic	NEAQS2004		23	7	2004		42.5443	-70.4046							0.464479	156.328
http://saga.pmel.noaa.gov/data/PrePlot.php?cruise=NEAQS2004	Atlantic	NEAQS2004		24	7	2004		42.9498	-69.2935							0.129022	55.8789
http://saga.pmel.noaa.gov/data/PrePlot.php?cruise=NEAQS2004	Atlantic	NEAQS2004		24	7	2004		42.8627	-69.9786							1.39989	120.572
http://saga.pmel.noaa.gov/data/PrePlot.php?cruise=NEAQS2004	Atlantic	NEAQS2004		24	7	2004		42.7342	-70.3067							0.770906	228.505
http://saga.pmel.noaa.gov/data/PrePlot.php?cruise=NEAQS2004	Atlantic	NEAQS2004		28	7	2004		42.7577	-70.7058							0.164503	11.0871
http://saga.pmel.noaa.gov/data/PrePlot.php?cruise=NEAQS2004	Atlantic	NEAQS2004		29	7	2004		42.7979	-70.6367							0.138698	13.4154
http://saga.pmel.noaa.gov/data/PrePlot.php?cruise=NEAQS2004	Atlantic	NEAQS2004		29	7	2004		42.3952	-70.0316							0.085477	22.285
http://saga.pmel.noaa.gov/data/PrePlot.php?cruise=NEAQS2004	Atlantic	NEAQS2004		29	7	2004		42.9393	-70.5824							0.998307	21.6198
http://saga.pmel.noaa.gov/data/PrePlot.php?cruise=NEAQS2004	Atlantic	NEAQS2004		30	7	2004		42.9722	-70.5081							0.348359	17.9056
http://saga.pmel.noaa.gov/data/PrePlot.php?cruise=NEAQS2004	Atlantic	NEAQS2004		30	7	2004		42.8167	-70.7092							0.646722	24.5025
http://saga.pmel.noaa.gov/data/PrePlot.php?cruise=NEAQS2004	Atlantic	NEAQS2004		31	7	2004		42.6665	-69.7498							0.153213	24.447
http://saga.pmel.noaa.gov/data/PrePlot.php?cruise=NEAQS2004	Atlantic	NEAQS2004		31	7	2004		42.8264	-70.6078							0.364487	86.8673
http://saga.pmel.noaa.gov/data/PrePlot.php?cruise=NEAQS2004	Atlantic	NEAQS2004		31	7	2004		42.7983	-70.6516							0.599952	169.577
http://saga.pmel.noaa.gov/data/PrePlot.php?cruise=NEAQS2004	Atlantic	NEAQS2004		1	8	2004		42.7991	-70.7444							0.346746	129.275
http://saga.pmel.noaa.gov/data/PrePlot.php?cruise=NEAQS2004	Atlantic	NEAQS2004		1	8	2004		43.2893	-69.8663							0.532215	165.641
http://saga.pmel.noaa.gov/data/PrePlot.php?cruise=NEAQS2004	Atlantic	NEAQS2004		1	8	2004		43.6367	-69.5945							1.85469	59.704
http://saga.pmel.noaa.gov/data/PrePlot.php?cruise=NEAQS2004	Atlantic	NEAQS2004		2	8	2004		43.42	-70.3076							2.91589	38.1396
http://saga.pmel.noaa.gov/data/PrePlot.php?cruise=NEAQS2004	Atlantic	NEAQS2004		2	8	2004		43.3332	-69.8949							5.06572	22.0633
http://saga.pmel.noaa.gov/data/PrePlot.php?cruise=NEAQS2004	Atlantic	NEAQS2004		2	8	2004		42.9819	-70.6263							3.77711	28.4938
http://saga.pmel.noaa.gov/data/PrePlot.php?cruise=NEAQS2004	Atlantic	NEAQS2004		3	8	2004		42.8021	-70.3324							3.71422	47.9517
http://saga.pmel.noaa.gov/data/PrePlot.php?cruise=NEAQS2004	Atlantic	NEAQS2004		3	8	2004		43.364	-70.2289							3.8126	69.5161
http://saga.pmel.noaa.gov/data/PrePlot.php?cruise=NEAQS2004	Atlantic	NEAQS2004		3	8	2004		43.5647	-68.9296							1.98855	25.8329
http://saga.pmel.noaa.gov/data/PrePlot.php?cruise=NEAQS2004	Atlantic	NEAQS2004		4	8	2004		43.273	-69.8104							0.32578	68.3519
http://saga.pmel.noaa.gov/data/PrePlot.php?cruise=NEAQS2004	Atlantic	NEAQS2004		4	8	2004		43.6442	-69.2616							0.103217	56.5996
http://saga.pmel.noaa.gov/data/PrePlot.php?cruise=NEAQS2004	Atlantic	NEAQS2004		4	8	2004		43.6442	-69.4054							0.175792	83.5412
http://saga.pmel.noaa.gov/data/PrePlot.php?cruise=NEAQS2004	Atlantic	NEAQS2004		5	8	2004		43.6442	-69.7594							0.735425	177.449
http://saga.pmel.noaa.gov/data/PrePlot.php?cruise=NEAQS2004	Atlantic	NEAQS2004		5	8	2004		43.7502	-68.7928							2.9046	38.4168
http://saga.pmel.noaa.gov/data/PrePlot.php?cruise=NEAQS2004	Atlantic	NEAQS2004		6	8	2004		44.3542	-67.5757							999	28.5493
http://saga.pmel.noaa.gov/data/PrePlot.php?cruise=NEAQS2004	Atlantic	NEAQS2004		6	8	2004		44.1796	-68.046							0.179018	40.0244
http://saga.pmel.noaa.gov/data/PrePlot.php?cruise=NEAQS2004	Atlantic	NEAQS2004		6	8	2004		44.2024	-68.3873							0.0919281	22.0633
http://saga.pmel.noaa.gov/data/PrePlot.php?cruise=NEAQS2004	Atlantic	NEAQS2004		7	8	2004		43.8601	-68.6951							0.54673	16.0208
http://saga.pmel.noaa.gov/data/PrePlot.php?cruise=NEAQS2004	Atlantic	NEAQS2004		7	8	2004		43.6325	-69.4827							0.264495	37.3635
http://saga.pmel.noaa.gov/data/PrePlot.php?cruise=NEAQS2004	Atlantic	NEAQS2004		7	8	2004		43.6557	-70.2168							0.180631	17.3513
http://saga.pmel.noaa.gov/data/PrePlot.php?cruise=NEAQS2004	Atlantic	NEAQS2004		8	8	2004		43.6604	-69.361							0.0370938	9.92295
http://saga.pmel.noaa.gov/data/PrePlot.php?cruise=NEAQS2004	Atlantic	NEAQS2004		8	8	2004		43.2668	-68.4038							0.258044	24.2807
http://saga.pmel.noaa.gov/data/PrePlot.php?cruise=NEAQS2004	Atlantic	NEAQS2004		9	8	2004		42.5509	-68.3839							0.159665	17.0741
http://saga.pmel.noaa.gov/data/PrePlot.php?cruise=NEAQS2004	Atlantic	NEAQS2004		9	8	2004		42.3588	-69.8554							0.964438	26.4427
http://saga.pmel.noaa.gov/data/PrePlot.php?cruise=NEAQS2004	Atlantic	NEAQS2004		10	8	2004		42.433	-70.6971							0.182243	7.8164
http://saga.pmel.noaa.gov/data/PrePlot.php?cruise=NEAQS2004	Atlantic	NEAQS2004		10	8	2004		42.369	-71.051							0.137086	32.7623
http://saga.pmel.noaa.gov/data/PrePlot.php?cruise=NEAQS2004	Atlantic	NEAQS2004		11	8	2004		42.3553	-70.4097							0.179018	13.5817
http://saga.pmel.noaa.gov/data/PrePlot.php?cruise=NEAQS2004	Atlantic	NEAQS2004		11	8	2004		42.7588	-70.2753							0.333844	41.1885
http://saga.pmel.noaa.gov/data/PrePlot.php?cruise=NEAQS2004	Atlantic	NEAQS2004		12	8	2004		42.5562	-69.3883							0.559632	129.109
http://saga.pmel.noaa.gov/data/PrePlot.php?cruise=NEAQS2004	Atlantic	NEAQS2004		12	8	2004		42.4538	-69.063							1.85953	174.455
http://saga.pmel.noaa.gov/data/PrePlot.php?cruise=NEAQS2004	Atlantic	NEAQS2004		12	8	2004		42.9352	-70.7437							2.43206	205.887
http://saga.pmel.noaa.gov/data/PrePlot.php?cruise=NEAQS2004	Atlantic	NEAQS2004		13	8	2004		42.9362	-70.3656							3.38521	145.74
http://saga.pmel.noaa.gov/data/PrePlot.php?cruise=NEAQS2004	Atlantic	NEAQS2004		13	8	2004		42.7416	-70.6446							2.27885	176.34
http://saga.pmel.noaa.gov/data/PrePlot.php?cruise=NEAQS2004	Atlantic	NEAQS2004		13	8	2004		42.793	-70.7782							1.27409	155.275
Alex Baker	Atlantic	AMT15	I01	19	9	2004		48.48	-8.92					48.03	-12.3	4.9654	3.92423
Alex Baker	Atlantic	AMT15	I02	20	9	2004		48.05	-12.58					47.75	-15.95	9.53501	5.01977
Alex Baker	Atlantic	AMT15	I03	21	9	2004		47.68	-15.98					45.05	-19.15	7.61057	10.8423
Alex Baker	Atlantic	AMT15	I04	22	9	2004		44.87	-19.25					41.43	-20	5.70074	4.97006
Alex Baker	Atlantic	AMT15	I05	23	9	2004		41.37	-20					37.8	-20.5	29.0453	14.1725
Alex Baker	Atlantic	AMT15	I08	25	9	2004		33.92	-21.02					30.58	-19.72	13.8254	6.91477
Alex Baker	Atlantic	AMT15	I09	26	9	2004		30.52	-19.57					28.75	-16.28	35.1321	29.0692
Alex Baker	Atlantic	AMT15	I11	29	9	2004		22.45	-20.45					20.95	-17.72	35.7065	18.8573
Alex Baker	Atlantic	AMT15	I12	30	9	2004		20.88	-17.72					20.88	18.72	58.0933	56.548
Alex Baker	Atlantic	AMT15	I13	1	10	2004		20.75	-18.87					21.92	-18.08	62.2277	83.4128
Alex Baker	Atlantic	AMT15	I14	2	10	2004		22.15	-18.38					20.47	-19.47	63.6787	69.8713
Alex Baker	Atlantic	AMT15	I15	6	10	2004		9.87	-22.78					6.95	-23.43	5.15649	5.689
Alex Baker	Atlantic	AMT15	I16	7	10	2004		6.87	-23.6					4.07	-24.08	12.4854	11.2771
Alex Baker	Atlantic	AMT15	I17	8	10	2004		3.97	-24.1					1.9	-24.57	15.0999	15.473
Alex Baker	Atlantic	AMT15	I18	9	10	2004		1.85	-24.58					-0.9	-25	17.4453	19.3688
Alex Baker	Atlantic	AMT15	I19	10	10	2004		-0.98	-25					-4.55	-25	10.9878	8.67433
Alex Baker	Atlantic	AMT15	I20	11	10	2004		-4.65	-25					-8	-25	8.0661	3.50412
Alex Baker	Atlantic	AMT15	I21	12	10	2004		-8.07	-25					-11.63	-25	14.8857	11.5096
Alex Baker	Atlantic	AMT15	I22	13	10	2004		-11.7	-25					-15.42	-25	8.55828	4.13374
Alex Baker	Atlantic	AMT15	I23	14	10	2004		-15.5	-24.98					-19.17	-25	4.81304	0.968753
Alex Baker	Atlantic	AMT15	I24	15	10	2004		-19.23	-25					-22.43	-19.9	1.8115	0.714063
Alex Baker	Atlantic	AMT15	I25	17	10	2004		-22.47	-19.82					-25.77	-12.8	1.39252	0.28621
Alex Baker	Atlantic	AMT15	I26	19	10	2004		-25.78	-12.73					-29.03	-5.57	2.40774	0.303497
Alex Baker	Atlantic	AMT15	I27	21	10	2004		-29.08	-5.47					-35.37	-0.72	4.00383	2.65583
Alex Baker	Atlantic	AMT15	I28	23	10	2004		-36.15	-0.12					-39.97	2.97	1.7898	0.799351
Alex Baker	Atlantic	AMT15	I29	25	10	2004		-40	6.87					-36.42	15	0.667211	0.376099
Alex Baker	Atlantic	AIM	tm02	23	3	2005		21.1	-17.9					20	-18	27.4792	12.6523
Alex Baker	Atlantic	AIM	tm03	23	3	2005		20	-18					19.8	-17.5	22.3973	6.79309
Alex Baker	Atlantic	AIM	tm04	24	3	2005		19.8	-17.5					19.3	-16.8	34.4006	23.687
Alex Baker	Atlantic	AIM	tm05	26	3	2005		19	-16.6					19	-18	30.606	4.67462
Alex Baker	Atlantic	AIM	tm06	28	3	2005		17	-18					17	-17	37.0563	4.17203
Alex Baker	Atlantic	AIM	tm07a	29	3	2005		17	-17					17.5	-17	45.3533	4.31796
Alex Baker	Atlantic	AIM	tm07b	30	3	2005		17.59	-17					18	-17.2	48.7372	34.9757
Alex Baker	Atlantic	AIM	tm08	31	3	2005		18	-17.2					18.5	-16.5	39.3631	7.11414
Alex Baker	Atlantic	AIM	tm09	1	4	2005		18.5	-16.5					19	-17.5	23.4102	3.91219
Alex Baker	Atlantic	AIM	tm10	2	4	2005		19	-17.5					18	-18.5	20.581	3.47473
Alex Baker	Atlantic	AIM	tm11	4	4	2005		17.5	-18.7					17.1	-22.4	21.1963	3.03229
Alex Baker	Atlantic	36N	I04	3	5	2005		36.0897	-68.895					36.6345	-70.2667	34.7315	64.8064
Alex Baker	Atlantic	36N	I05	4	5	2005		36.6952	-70.207					37.6013	-72.2	50.634	87.0167
Alex Baker	Atlantic	36N	I06	6	5	2005		37.779	-72.4463					37.7728	-72.7967	6.33427	13.4282
Alex Baker	Atlantic	36N	I07	9	5	2005		35.5962	-74.1195					35.4188	-72.3928	22.2552	21.2447
Alex Baker	Atlantic	36N	I08	10	5	2005		35.4423	-72.2873					35.9598	-70.2418	18.942	16.0177
Alex Baker	Atlantic	36N	I09	11	5	2005		35.9705	-70.246					36.2523	-67.1913	23.8258	30.5053
Alex Baker	Atlantic	36N	I10	13	5	2005		36.2478	-66.8063					36.2065	-64.81	8.73169	12.6068
Alex Baker	Atlantic	36N	I11	14	5	2005		36.1947	-64.6233					36.2393	-63.021	31.2403	30.9113
Alex Baker	Atlantic	36N	I12	15	5	2005		36.2512	-63.021					36.198	-59.6605	23.7327	24.5601
Alex Baker	Atlantic	36N	I13	17	5	2005		36.1327	-59.3145					36.0532	-57.8607	17.0949	21.7586
Alex Baker	Atlantic	36N	I14	18	5	2005		36.1563	-57.3227					36.2503	-54.7383	16.4822	32.5847
Alex Baker	Atlantic	36N	I15	19	5	2005		36.2488	-54.7163					36.482	-52.3295	12.8812	17.8967
Alex Baker	Atlantic	36N	I16	20	5	2005		36.4882	-52.2772					36.4	-50.311	13.707	11.7553
Alex Baker	Atlantic	36N	I17	21	5	2005		36.2695	-49.9052					36.2437	-48.1565	9.50115	6.95987
Alex Baker	Atlantic	36N	I18	22	5	2005		36.2502	-48.1327					36.2485	-46.4688	3.98926	3.87703
Alex Baker	Atlantic	36N	I19	23	5	2005		36.2545	-46.2735					36.2505	-43.9825	6.81855	6.55078
Alex Baker	Atlantic	36N	I20	24	5	2005		36.252	-43.6068					36.2852	-41.9325	6.06194	4.81548
Alex Baker	Atlantic	36N	I21	25	5	2005		36.2998	-41.9177					36.2558	-40.064	5.95521	3.99046
Alex Baker	Atlantic	36N	I22	26	5	2005		36.2998	-39.5353					36.251	-37.6473	7.30599	6.0743
Alex Baker	Atlantic	36N	I23	27	5	2005		36.2493	-37.5672					36.2508	-35.236	7.79481	5.50142
Alex Baker	Atlantic	36N	I24	28	5	2005		36.2508	-35.2433					36.2487	-32.7625	7.46749	4.81375
Alex Baker	Atlantic	36N	I25	29	5	2005		36.2487	-32.7563					36.2383	-30.2528	7.1452	5.449
Alex Baker	Atlantic	36N	I26	30	5	2005		36.2538	-29.7828					36.2432	-27.8378	9.86806	5.57472
Alex Baker	Atlantic	36N	I27	31	5	2005		36.2357	-27.8357					36.5262	-25.9585	11.9112	9.93369
Alex Baker	Atlantic	36N	I28	1	6	2005		36.7487	-25.897					36.2503	-23.5828	10.7013	5.99308
Alex Baker	Atlantic	36N	I29	3	6	2005		36.2503	-23.5828					36.2512	-21.7528	6.38924	5.5212
Alex Baker	Atlantic	36N	I30	4	6	2005		36.2517	-21.751					36.2502	-19.914	9.33823	9.49574
Alex Baker	Atlantic	36N	I31	5	6	2005		36.249	-19.9145					36.2525	-18.3858	8.79665	7.15083
Alex Baker	Atlantic	36N	I32	6	6	2005		36.249	-18.0863					36.2492	-16.4315	8.72251	4.8322
Alex Baker	Atlantic	36N	I33	8	6	2005		35.9848	-14.9483					35.8008	-12.9542	53.4744	63.0135
Alex Baker	Atlantic	36N	I34	9	6	2005		35.7968	-12.5948					35.9143	-9.77267	57.3937	78.1202
Alex Baker	Atlantic	36N	I35	11	6	2005		36.1493	-9.06483					36.7837	-8.58233	45.91	73.2654
Alex Baker	Atlantic	36N	I36	12	6	2005		35.5073	-8.52667					34.3822	-7.7445	24.4708	30.2408
Alex Baker	Atlantic	AMT16	M03	22	5	2005		-33.123	17.679					-31.613	9.473	0.984745	0.741762
Alex Baker	Atlantic	AMT16	M04	25	5	2005		-30.671	4.42					-28.595	-6.52	2.73227	3.88297
Alex Baker	Atlantic	AMT16	M05	27	5	2005		-28.574	-6.626					-27.108	-14.213	1.08701	0.818792
Alex Baker	Atlantic	AMT16	M06	29	5	2005		-27.03	-14.632					-24.7133	-23.6647	4.08888	1.44
Alex Baker	Atlantic	AMT16	M07	2	6	2005		-18.452	-24.999					-11.359	-25.0032	1.29454	3.29987
Alex Baker	Atlantic	AMT16	M09	6	6	2005		-2.961	-24.998					2.436	-26.161	13.8219	10.4984
Alex Baker	Atlantic	AMT16	M10	8	6	2005		2.918	-26.392					8.122	-28.886	14.0624	7.39391
Alex Baker	Atlantic	AMT16	M11	10	6	2005		8.613	-29.118					13.814	-31.648	20.6034	0.825785
Alex Baker	Atlantic	AMT16	M12	12	6	2005		14.274	-31.873					20.687	-35.079	9.58658	0.810983
Alex Baker	Atlantic	AMT16	M13	14	6	2005		21.361	-35.432					27.279	-38.526	2.05519	4.55757
Alex Baker	Atlantic	AMT16	M14	16	6	2005		27.844	-38.827					32.292	-43.521	5.81504	1.13171
Alex Baker	Atlantic	AMT16	M15	18	6	2005		32.666	-44.106					36.605	-36.401	8.24878	21.2978
Alex Baker	Atlantic	AMT16	M16	21	6	2005		36.675	-36.141					42.361	-24.742	4.68463	0.538909
Alex Baker	Atlantic	AMT16	M17	24	6	2005		42.978	-23.906					47.205	-14.334	12.6318	9.03185
Alex Baker	Atlantic	AMT17	I04	17	10	2005		50.4892	-11.2645					48.9657	-16.5043	2.06665	2.91437
Alex Baker	Atlantic	AMT17	I05	18	10	2005		48.9357	-16.4827					45.2645	-17.7557	1.22561	2.9183
Alex Baker	Atlantic	AMT17	I06	19	10	2005		44.8498	-17.8947					44.0967	-20.0435	6.2166	3.32675
Alex Baker	Atlantic	AMT17	I07	20	10	2005		44.0462	-20.1813					37.6255	-24.7812	8.63332	6.89443
Alex Baker	Atlantic	AMT17	I08	22	10	2005		37.5005	-25.3652					36.6737	-27.2473	12.0076	8.17985
Alex Baker	Atlantic	AMT17	I09	24	10	2005		36.659	-27.2702					37.637	-25.7642	19.8897	13.7444
Alex Baker	Atlantic	AMT17	I10	25	10	2005		37.684	-25.6095					37.7358	-25.6338	1.57767	1.35503
Alex Baker	Atlantic	AMT17	I11	27	10	2005		37.3358	-26.5088					35.8897	-29.1878	6.69529	3.95999
Alex Baker	Atlantic	AMT17	I12	28	10	2005		35.729	-29.4858					34.2637	-32.5025	5.44876	3.20783
Alex Baker	Atlantic	AMT17	I13	30	10	2005		30.8582	-33.0802					29.363	-36.6633	4.16333	1.85412
Alex Baker	Atlantic	AMT17	I16	2	11	2005		23.1388	-36.3512					17.3707	-33.4928	5.6572	2.09161
Alex Baker	Atlantic	AMT17	I17	4	11	2005		17.4802	-33.4677					14.3078	-31.897	14.3567	7.83896
Alex Baker	Atlantic	AMT17	I18	5	11	2005		14.2593	-31.8707					11.7875	-30.664	26.0484	18.7784
Alex Baker	Atlantic	AMT17	I19	6	11	2005		11.6892	-30.614					6.45867	-27.8515	7.5745	4.38753
Alex Baker	Atlantic	AMT17	I21	9	11	2005		2.75867	-26.3187					0.0538333	-25.0337	11.5454	11.0436
Alex Baker	Atlantic	AMT17	I22	10	11	2005		-0.304167	-25					-4.3095	-25.0012	7.80877	6.80059
Alex Baker	Atlantic	AMT17	I23	11	11	2005		-5.07933	-24.9998					-8.374	-24.9965	10.4266	6.98285
Alex Baker	Atlantic	AMT17	I24	12	11	2005		-9.04583	-25					-11.8395	-25.0003	12.5312	7.05078
Alex Baker	Atlantic	AMT17	I25	13	11	2005		-12.0348	-25.0013					-15.5508	-24.9982	14.8142	7.03825
Alex Baker	Atlantic	AMT17	I26	14	11	2005		-16.0273	-24.9997					-19.5782	-25	11.1949	6.66827
Alex Baker	Atlantic	AMT17	I27	15	11	2005		-19.6818	-25.0063					-21.1055	-22.3838	8.53121	4.11062
Alex Baker	Atlantic	AMT17	I28	16	11	2005		-21.101	-22.3757					-22.6143	-19.138	4.16858	1.58915
Alex Baker	Atlantic	AMT17	I29	17	11	2005		-22.7268	-18.8675					-26.21	-10.8945	1.53396	1.20235
Alex Baker	Atlantic	AMT17	I30	19	11	2005		-26.3458	-10.588					-29.3212	-3.5795	0.660527	1.03308
Alex Baker	Atlantic	AMT17	I31	21	11	2005		-29.5812	-2.94633					-32.9387	5.49817	4.91716	2.16904
Alex Baker	Atlantic	AMT17	I32	23	11	2005		-33.0157	5.90017					-33.7848	9.58483	1.03918	1.9724
Alex Baker	Atlantic	AMT17	I33	24	11	2005		-33.8788	10.1612					-35.1027	14.2008	2.94549	3.00747
Alex Baker	Atlantic	ANT23-1	TM01	25	10	2005		41.1583	-9.85667					37.0383	-12.3217	36.4929	21.2141
Alex Baker	Atlantic	ANT23-1	TM03	27	10	2005		33.5017	-14.54					29.601	-16.3245	9.12336	4.95084
Alex Baker	Atlantic	ANT23-1	TM04	28	10	2005		29.5595	-16.2942					25.5303	-17.8643	18.3737	8.57497
Alex Baker	Atlantic	ANT23-1	TM05	29	10	2005		25.5154	-17.8783					22.5008	-20.497	11.2082	7.33465
Alex Baker	Atlantic	ANT23-1	TM06	30	10	2005		22.4809	-20.5118					18.3726	-20.9224	14.3886	17.2416
Alex Baker	Atlantic	ANT23-1	TM07	31	10	2005		18.37	-20.9266					13.9063	-20.8141	29.6579	6.50754
Alex Baker	Atlantic	ANT23-1	TM08	1	11	2005		13.8809	-20.8167					10.6214	-20.1306	40.3892	16.9325
Alex Baker	Atlantic	ANT23-1	TM09	2	11	2005		10.4598	-20.0958					7.02307	-17.4964	14.5313	10.9761
Alex Baker	Atlantic	ANT23-1	TM10	3	11	2005		7.0392	-17.4615					3.69855	-14.7195	19.1841	16.7599
Alex Baker	Atlantic	ANT23-1	TM11	4	11	2005		3.67543	-14.7017					0.264683	-12.0122	21.3573	19.2633
Alex Baker	Atlantic	ANT23-1	TM12	5	11	2005		0.25585	-12.0031					-2.15807	-10.1269	8.95367	8.67823
Alex Baker	Atlantic	ANT23-1	TM13	6	11	2005		-2.15638	-10.1287					-5.9866	-7.14172	10.4318	7.72379
Alex Baker	Atlantic	ANT23-1	TM14	7	11	2005		-6.03237	-7.10592					-8.79785	-4.97643	13.3421	13.207
Alex Baker	Atlantic	ANT23-1	TM15	8	11	2005		-8.84827	-4.89745					-11.8632	-2.51388	15.2065	9.97226
Alex Baker	Atlantic	ANT23-1	TM16	9	11	2005		-11.88	-2.50872					-14.2684	-0.59445	6.96343	7.71727
Alex Baker	Atlantic	ANT23-1	TM17	10	11	2005		-14.2734	-0.588917					-21.1089	4.99332	6.25938	3.83404
Alex Baker	Atlantic	ANT23-1	TM18	12	11	2005		-21.1319	5.01093					-25.9436	9.34363	4.71375	4.15992
Alex Baker	Atlantic	POS06	M029	29	1	2006		23.7001	-23.6881					21.9969	-27.0555	24.3704	10.1358
Alex Baker	Atlantic	POS06	M030	30	1	2006		21.9996	-27.0457					20.9788	-29.3654	17.998	10.433
Alex Baker	Atlantic	POS06	M031	31	1	2006		20.9735	-29.37					17.6609	-28.3639	19.1261	7.96519
Alex Baker	Atlantic	POS06	M032	1	2	2006		17.6643	-28.3673					14.8666	-27.5718	10.54	5.93942
Alex Baker	Atlantic	POS06	M033	2	2	2006		14.8741	-27.586					12.0003	-25.9987	25.789	12.8755
Alex Baker	Atlantic	POS06	M034A	3	2	2006		11.9982	-25.9973					13.0819	-25.8058	29.7372	15.8988
Alex Baker	Atlantic	POS06	M034B	3	2	2006		13.1304	-25.7972					14.6827	-25.5211	31.4336	13.7261
Alex Baker	Atlantic	POS06	M035B	4	2	2006		14.7784	-25.3329					15.6619	-25.3329	31.9029	14.0391
Alex Baker	Atlantic	POS06	M035A	4	2	2006		15.6843	-25.3286					16.8981	-25.0352	15.9208	14.2955
Alex Baker	Atlantic	POS06	M036	5	2	2006		16.9806	-24.6538					17.36	-22.381	38.1468	13.4076
Alex Baker	Atlantic	POS06	M037	6	2	2006		17.3575	-22.3854					16.4774	-21.5065	40.5353	11.8016
Alex Baker	Atlantic	POS06	M038	7	2	2006		16.4808	-21.506					16.7738	-22.5709	38.2973	38.5564
Alex Baker	Atlantic	POS06	M039	8	2	2006		16.8142	-22.6333					17.0511	-24.0951	7.10088	6.7311
Alex Baker	Atlantic	POS06	M040	9	2	2006		17.051	-24.0946					14.8287	-25.508	7.7124	6.12598
Alex Baker	Atlantic	POS06	M041	10	2	2006		14.6683	-25.5267					16.9878	-24.7874	7.89565	4.02498
Alex Baker	Atlantic	POS06	M043	12	2	2006		17.0012	-24.6389					19.6217	-22.8191	3.7364	2.87963
Alex Baker	Atlantic	POS06	M045	14	2	2006		19.5589	-22.8043					18.7182	-24.3842	11.6463	5.72385
Alex Baker	Atlantic	POS06	M046	15	2	2006		18.6992	-24.3894					19.8989	-27.5984	8.14944	4.88733
Alex Baker	Atlantic	POS06	M047	16	2	2006		19.975	-27.5983					22.9977	-27.5974	9.44595	6.37113
Alex Baker	Atlantic	POS06	M048	17	2	2006		23.0089	-27.5869					26.3431	-27.5963	4.67486	7.05354
Alex Baker	Atlantic	POS06	M049	18	2	2006		26.3442	-27.5968					29.993	-27.6155	3.2223	4.63492
Alex Baker	Atlantic	POS06	M050	19	2	2006		29.9989	-27.6161					29.6442	-24.3935	7.19563	11.3651
Alex Baker	Atlantic	POS06	M052	21	2	2006		29.2501	-20.8781					28.9323	-17.9864	4.18389	6.82995
http://saga.pmel.noaa.gov/data/PrePlot.php?cruise=TEXAQS2006	Atlantic	TEXAQS		28	7	2006		30.8945	-80.7983							1.28066	52.7836
http://saga.pmel.noaa.gov/data/PrePlot.php?cruise=TEXAQS2006	Atlantic	TEXAQS		29	7	2006		28.7346	-80.2466							2.22505	20.0038
http://saga.pmel.noaa.gov/data/PrePlot.php?cruise=TEXAQS2006	Atlantic	TEXAQS		29	7	2006		27.2931	-80.0035							4.75149	9.50122
http://saga.pmel.noaa.gov/data/PrePlot.php?cruise=TEXAQS2006	Atlantic	TEXAQS		29	7	2006		26.4846	-79.9323							2.48939	4.77315
http://saga.pmel.noaa.gov/data/PrePlot.php?cruise=TEXAQS2006	Atlantic	TEXAQS		30	7	2006		24.7061	-80.6415							8.16537	12.1906
http://saga.pmel.noaa.gov/data/PrePlot.php?cruise=TEXAQS2006	Atlantic	TEXAQS		30	7	2006		24.3548	-81.8167							5.61503	12.5515
http://saga.pmel.noaa.gov/data/PrePlot.php?cruise=TEXAQS2006	Atlantic	TEXAQS		30	7	2006		24.366	-82.7034							10.9854	18.2209
http://saga.pmel.noaa.gov/data/PrePlot.php?cruise=TEXAQS2006	Atlantic	TEXAQS		31	7	2006		24.7595	-83.408							19.6667	67.7099
http://saga.pmel.noaa.gov/data/PrePlot.php?cruise=TEXAQS2006	Atlantic	TEXAQS		31	7	2006		25.5916	-85.7797							7.54161	29.4209
http://saga.pmel.noaa.gov/data/PrePlot.php?cruise=TEXAQS2006	Atlantic	TEXAQS		1	8	2006		26.2592	-87.697							8.52957	26.0865
http://saga.pmel.noaa.gov/data/PrePlot.php?cruise=TEXAQS2006	Atlantic	TEXAQS		1	8	2006		26.4958	-88.127							6.79626	30.5731
http://saga.pmel.noaa.gov/data/PrePlot.php?cruise=TEXAQS2006	Atlantic	TEXAQS		1	8	2006		27.6943	-89.6975							4.05824	30.3599
http://saga.pmel.noaa.gov/data/PrePlot.php?cruise=TEXAQS2006	Atlantic	TEXAQS		2	8	2006		27.9437	-91.4231							6.9691	31.5377
http://saga.pmel.noaa.gov/data/PrePlot.php?cruise=TEXAQS2006	Atlantic	TEXAQS		2	8	2006		28.8595	-93.8819							999	181.784
http://saga.pmel.noaa.gov/data/PrePlot.php?cruise=TEXAQS2006	Atlantic	TEXAQS		3	8	2006		29.7496	-95.2888							5.92459	48.6356
http://saga.pmel.noaa.gov/data/PrePlot.php?cruise=TEXAQS2006	Atlantic	TEXAQS		3	8	2006		29.7474	-95.2868							4.69427	22.5838
http://saga.pmel.noaa.gov/data/PrePlot.php?cruise=TEXAQS2006	Atlantic	TEXAQS		4	8	2006		29.7249	-95.267							4.7682	64.261
http://saga.pmel.noaa.gov/data/PrePlot.php?cruise=TEXAQS2006	Atlantic	TEXAQS		4	8	2006		29.3473	-94.7547							4.35976	40.2712
http://saga.pmel.noaa.gov/data/PrePlot.php?cruise=TEXAQS2006	Atlantic	TEXAQS		4	8	2006		29.1504	-94.5695							4.10528	40.5986
http://saga.pmel.noaa.gov/data/PrePlot.php?cruise=TEXAQS2006	Atlantic	TEXAQS		5	8	2006		29.6671	-94.9753							3.31787	44.3745
http://saga.pmel.noaa.gov/data/PrePlot.php?cruise=TEXAQS2006	Atlantic	TEXAQS		5	8	2006		29.6821	-95.007							3.29782	54.1465
http://saga.pmel.noaa.gov/data/PrePlot.php?cruise=TEXAQS2006	Atlantic	TEXAQS		5	8	2006		29.6813	-95.0076							1.51254	27.1716
http://saga.pmel.noaa.gov/data/PrePlot.php?cruise=TEXAQS2006	Atlantic	TEXAQS		6	8	2006		29.6814	-95.0076							2.40657	57.5547
http://saga.pmel.noaa.gov/data/PrePlot.php?cruise=TEXAQS2006	Atlantic	TEXAQS		6	8	2006		28.6509	-95.2813							1.51534	22.0214
http://saga.pmel.noaa.gov/data/PrePlot.php?cruise=TEXAQS2006	Atlantic	TEXAQS		7	8	2006		28.2011	-95.5715							1.37359	12.1825
http://saga.pmel.noaa.gov/data/PrePlot.php?cruise=TEXAQS2006	Atlantic	TEXAQS		7	8	2006		27.8672	-95.7339							999	447.192
http://saga.pmel.noaa.gov/data/PrePlot.php?cruise=TEXAQS2006	Atlantic	TEXAQS		7	8	2006		27.2845	-96.6351							2.73779	13.9277
http://saga.pmel.noaa.gov/data/PrePlot.php?cruise=TEXAQS2006	Atlantic	TEXAQS		8	8	2006		27.9067	-96.559							3.33099	20.6771
http://saga.pmel.noaa.gov/data/PrePlot.php?cruise=TEXAQS2006	Atlantic	TEXAQS		8	8	2006		28.1893	-96.2098							3.10142	24.1633
http://saga.pmel.noaa.gov/data/PrePlot.php?cruise=TEXAQS2006	Atlantic	TEXAQS		8	8	2006		28.8669	-95.1762							3.0272	25.5536
http://saga.pmel.noaa.gov/data/PrePlot.php?cruise=TEXAQS2006	Atlantic	TEXAQS		9	8	2006		29.5847	-93.434							3.44057	21.4149
http://saga.pmel.noaa.gov/data/PrePlot.php?cruise=TEXAQS2006	Atlantic	TEXAQS		10	8	2006		29.5963	-93.7948							2.48338	37.0884
http://saga.pmel.noaa.gov/data/PrePlot.php?cruise=TEXAQS2006	Atlantic	TEXAQS		10	8	2006		30.0205	-94.0237							1.69106	39.4264
http://saga.pmel.noaa.gov/data/PrePlot.php?cruise=TEXAQS2006	Atlantic	TEXAQS		10	8	2006		30.0782	-94.0893							1.72785	33.6607
http://saga.pmel.noaa.gov/data/PrePlot.php?cruise=TEXAQS2006	Atlantic	TEXAQS		11	8	2006		29.911	-93.8925							2.41849	40.9516
http://saga.pmel.noaa.gov/data/PrePlot.php?cruise=TEXAQS2006	Atlantic	TEXAQS		11	8	2006		29.2072	-94.3174							1.63555	19.1366
http://saga.pmel.noaa.gov/data/PrePlot.php?cruise=TEXAQS2006	Atlantic	TEXAQS		11	8	2006		29.7514	-95.2881							2.22361	29.9919
http://saga.pmel.noaa.gov/data/PrePlot.php?cruise=TEXAQS2006	Atlantic	TEXAQS		12	8	2006		29.7504	-95.2883							1.27498	20.8117
http://saga.pmel.noaa.gov/data/PrePlot.php?cruise=TEXAQS2006	Atlantic	TEXAQS		12	8	2006		29.7507	-95.289							2.22968	18.527
http://saga.pmel.noaa.gov/data/PrePlot.php?cruise=TEXAQS2006	Atlantic	TEXAQS		13	8	2006		29.6125	-94.9551							4.24103	32.7031
http://saga.pmel.noaa.gov/data/PrePlot.php?cruise=TEXAQS2006	Atlantic	TEXAQS		13	8	2006		29.2126	-94.655							3.91517	40.6009
http://saga.pmel.noaa.gov/data/PrePlot.php?cruise=TEXAQS2006	Atlantic	TEXAQS		13	8	2006		29.6821	-95.0079							2.02324	16.8552
http://saga.pmel.noaa.gov/data/PrePlot.php?cruise=TEXAQS2006	Atlantic	TEXAQS		14	8	2006		29.6846	-95.0082							2.21382	29.8479
http://saga.pmel.noaa.gov/data/PrePlot.php?cruise=TEXAQS2006	Atlantic	TEXAQS		14	8	2006		29.6827	-95.008							2.51323	36.8113
http://saga.pmel.noaa.gov/data/PrePlot.php?cruise=TEXAQS2006	Atlantic	TEXAQS		14	8	2006		29.6822	-95.0078							1.90275	39.0421
http://saga.pmel.noaa.gov/data/PrePlot.php?cruise=TEXAQS2006	Atlantic	TEXAQS		15	8	2006		29.6813	-95.0091							3.05129	40.8869
http://saga.pmel.noaa.gov/data/PrePlot.php?cruise=TEXAQS2006	Atlantic	TEXAQS		15	8	2006		29.6812	-95.0082							2.45774	43.6405
http://saga.pmel.noaa.gov/data/PrePlot.php?cruise=TEXAQS2006	Atlantic	TEXAQS		15	8	2006		29.6811	-95.0084							2.4491	48.5417
http://saga.pmel.noaa.gov/data/PrePlot.php?cruise=TEXAQS2006	Atlantic	TEXAQS		16	8	2006		29.6814	-95.0087							3.20814	52.0346
http://saga.pmel.noaa.gov/data/PrePlot.php?cruise=TEXAQS2006	Atlantic	TEXAQS		16	8	2006		29.6833	-94.9861							2.81341	66.9705
http://saga.pmel.noaa.gov/data/PrePlot.php?cruise=TEXAQS2006	Atlantic	TEXAQS		16	8	2006		29.3218	-94.408							2.73059	49.0158
http://saga.pmel.noaa.gov/data/PrePlot.php?cruise=TEXAQS2006	Atlantic	TEXAQS		17	8	2006		29.3531	-94.7873							2.31914	53.2997
http://saga.pmel.noaa.gov/data/PrePlot.php?cruise=TEXAQS2006	Atlantic	TEXAQS		17	8	2006		29.6831	-94.9858							2.30385	71.0643
http://saga.pmel.noaa.gov/data/PrePlot.php?cruise=TEXAQS2006	Atlantic	TEXAQS		17	8	2006		29.6812	-95.0087							1.37776	74.8447
http://saga.pmel.noaa.gov/data/PrePlot.php?cruise=TEXAQS2006	Atlantic	TEXAQS		18	8	2006		29.3888	-94.8118							1.20132	89.527
http://saga.pmel.noaa.gov/data/PrePlot.php?cruise=TEXAQS2006	Atlantic	TEXAQS		18	8	2006		29.6832	-94.9856							0.970663	73.2945
http://saga.pmel.noaa.gov/data/PrePlot.php?cruise=TEXAQS2006	Atlantic	TEXAQS		18	8	2006		29.283	-94.5442							0.835226	82.2733
http://saga.pmel.noaa.gov/data/PrePlot.php?cruise=TEXAQS2006	Atlantic	TEXAQS		23	8	2006		29.0062	-94.6591							1.85804	45.9327
http://saga.pmel.noaa.gov/data/PrePlot.php?cruise=TEXAQS2006	Atlantic	TEXAQS		23	8	2006		29.0069	-95.1006							0.992387	47.7663
http://saga.pmel.noaa.gov/data/PrePlot.php?cruise=TEXAQS2006	Atlantic	TEXAQS		23	8	2006		29.2254	-94.7512							1.39278	41.2103
http://saga.pmel.noaa.gov/data/PrePlot.php?cruise=TEXAQS2006	Atlantic	TEXAQS		24	8	2006		28.5785	-95.8594							0.95571	17.6449
http://saga.pmel.noaa.gov/data/PrePlot.php?cruise=TEXAQS2006	Atlantic	TEXAQS		24	8	2006		28.6439	-96.5551							1.13874	36.5753
http://saga.pmel.noaa.gov/data/PrePlot.php?cruise=TEXAQS2006	Atlantic	TEXAQS		24	8	2006		28.7381	-95.1135							1.19141	17.2634
http://saga.pmel.noaa.gov/data/PrePlot.php?cruise=TEXAQS2006	Atlantic	TEXAQS		25	8	2006		29.5058	-93.8439							0.499344	15.7475
http://saga.pmel.noaa.gov/data/PrePlot.php?cruise=TEXAQS2006	Atlantic	TEXAQS		25	8	2006		29.2933	-94.5646							1.33902	14.2715
http://saga.pmel.noaa.gov/data/PrePlot.php?cruise=TEXAQS2006	Atlantic	TEXAQS		25	8	2006		29.5131	-93.8136							1.1637	13.886
http://saga.pmel.noaa.gov/data/PrePlot.php?cruise=TEXAQS2006	Atlantic	TEXAQS		26	8	2006		29.4542	-93.9275							1.98843	9.26629
http://saga.pmel.noaa.gov/data/PrePlot.php?cruise=TEXAQS2006	Atlantic	TEXAQS		26	8	2006		29.6819	-95.0075							3.48725	28.3596
http://saga.pmel.noaa.gov/data/PrePlot.php?cruise=TEXAQS2006	Atlantic	TEXAQS		27	8	2006		29.6822	-95.0075							2.02317	23.185
http://saga.pmel.noaa.gov/data/PrePlot.php?cruise=TEXAQS2006	Atlantic	TEXAQS		27	8	2006		29.6821	-95.0075							2.00952	17.7826
http://saga.pmel.noaa.gov/data/PrePlot.php?cruise=TEXAQS2006	Atlantic	TEXAQS		27	8	2006		29.6825	-95.0056							4.3502	38.6368
http://saga.pmel.noaa.gov/data/PrePlot.php?cruise=TEXAQS2006	Atlantic	TEXAQS		28	8	2006		29.6812	-95.0091							4.16601	14.2877
http://saga.pmel.noaa.gov/data/PrePlot.php?cruise=TEXAQS2006	Atlantic	TEXAQS		28	8	2006		29.6833	-94.9858							5.47661	25.3239
http://saga.pmel.noaa.gov/data/PrePlot.php?cruise=TEXAQS2006	Atlantic	TEXAQS		28	8	2006		29.6835	-94.9857							5.2242	23.6295
http://saga.pmel.noaa.gov/data/PrePlot.php?cruise=TEXAQS2006	Atlantic	TEXAQS		29	8	2006		28.9517	-94.7696							7.55541	26.4565
http://saga.pmel.noaa.gov/data/PrePlot.php?cruise=TEXAQS2006	Atlantic	TEXAQS		29	8	2006		29.2822	-94.5396							3.72967	22.4395
http://saga.pmel.noaa.gov/data/PrePlot.php?cruise=TEXAQS2006	Atlantic	TEXAQS		30	8	2006		28.4567	-94.7932							3.64377	23.227
http://saga.pmel.noaa.gov/data/PrePlot.php?cruise=TEXAQS2006	Atlantic	TEXAQS		30	8	2006		29.0816	-94.9165							3.23698	88.9851
http://saga.pmel.noaa.gov/data/PrePlot.php?cruise=TEXAQS2006	Atlantic	TEXAQS		30	8	2006		29.1149	-94.9482							3.25544	40.0518
http://saga.pmel.noaa.gov/data/PrePlot.php?cruise=TEXAQS2006	Atlantic	TEXAQS		31	8	2006		28.9367	-95.3315							0.476378	38.999
http://saga.pmel.noaa.gov/data/PrePlot.php?cruise=TEXAQS2006	Atlantic	TEXAQS		31	8	2006		29.2716	-94.6813							0.0642915	50.7515
http://saga.pmel.noaa.gov/data/PrePlot.php?cruise=TEXAQS2006	Atlantic	TEXAQS		1	9	2006		29.551	-94.9097							999	42.107
http://saga.pmel.noaa.gov/data/PrePlot.php?cruise=TEXAQS2006	Atlantic	TEXAQS		1	9	2006		29.0855	-94.9992							0.165253	60.5318
http://saga.pmel.noaa.gov/data/PrePlot.php?cruise=TEXAQS2006	Atlantic	TEXAQS		1	9	2006		29.2327	-94.6467							0.163742	65.2221
http://saga.pmel.noaa.gov/data/PrePlot.php?cruise=TEXAQS2006	Atlantic	TEXAQS		2	9	2006		29.5511	-94.9095							0.297449	145.506
http://saga.pmel.noaa.gov/data/PrePlot.php?cruise=TEXAQS2006	Atlantic	TEXAQS		2	9	2006		29.3775	-94.8062							0.693703	179.853
http://saga.pmel.noaa.gov/data/PrePlot.php?cruise=TEXAQS2006	Atlantic	TEXAQS		2	9	2006		29.6825	-95.0057							0.69379	103.967
http://saga.pmel.noaa.gov/data/PrePlot.php?cruise=TEXAQS2006	Atlantic	TEXAQS		3	9	2006		29.5964	-94.9456							0.416606	123.867
http://saga.pmel.noaa.gov/data/PrePlot.php?cruise=TEXAQS2006	Atlantic	TEXAQS		3	9	2006		29.5445	-94.905							0.385539	143.282
http://saga.pmel.noaa.gov/data/PrePlot.php?cruise=TEXAQS2006	Atlantic	TEXAQS		4	9	2006		29.1827	-94.7543							0.552945	172.631
http://saga.pmel.noaa.gov/data/PrePlot.php?cruise=TEXAQS2006	Atlantic	TEXAQS		4	9	2006		29.1413	-94.5015							999	214.677
http://saga.pmel.noaa.gov/data/PrePlot.php?cruise=TEXAQS2006	Atlantic	TEXAQS		4	9	2006		29.3761	-94.0912							0.125203	185.825
http://saga.pmel.noaa.gov/data/PrePlot.php?cruise=TEXAQS2006	Atlantic	TEXAQS		5	9	2006		28.4018	-95.7059							0.689079	138.532
http://saga.pmel.noaa.gov/data/PrePlot.php?cruise=TEXAQS2006	Atlantic	TEXAQS		5	9	2006		28.0269	-96.0598							0.807488	177.629
http://saga.pmel.noaa.gov/data/PrePlot.php?cruise=TEXAQS2006	Atlantic	TEXAQS		5	9	2006		28.9195	-95.2353							0.436772	132.155
http://saga.pmel.noaa.gov/data/PrePlot.php?cruise=TEXAQS2006	Atlantic	TEXAQS		6	9	2006		28.8654	-95.2523							0.420121	117.247
http://saga.pmel.noaa.gov/data/PrePlot.php?cruise=TEXAQS2006	Atlantic	TEXAQS		7	9	2006		29.7327	-95.2767							0.464911	161.146
http://saga.pmel.noaa.gov/data/PrePlot.php?cruise=TEXAQS2006	Atlantic	TEXAQS		7	9	2006		29.75	-95.1081							0.359013	149.799
http://saga.pmel.noaa.gov/data/PrePlot.php?cruise=TEXAQS2006	Atlantic	TEXAQS		8	9	2006		29.7496	-95.1077							0.183967	137.247
http://saga.pmel.noaa.gov/data/PrePlot.php?cruise=TEXAQS2006	Atlantic	TEXAQS		8	9	2006		29.725	-95.2682							0.71178	171.657
http://saga.pmel.noaa.gov/data/PrePlot.php?cruise=TEXAQS2006	Atlantic	TEXAQS		8	9	2006		29.683	-95.0072							0.510731	167.916
http://saga.pmel.noaa.gov/data/PrePlot.php?cruise=TEXAQS2006	Atlantic	TEXAQS		9	9	2006		29.6374	-94.9646							0.195002	145.047
http://saga.pmel.noaa.gov/data/PrePlot.php?cruise=TEXAQS2006	Atlantic	TEXAQS		9	9	2006		29.6325	-94.9628							999	181.412
http://saga.pmel.noaa.gov/data/PrePlot.php?cruise=TEXAQS2006	Atlantic	TEXAQS		9	9	2006		28.505	-95.5351							1.90404	102.795
http://saga.pmel.noaa.gov/data/PrePlot.php?cruise=TEXAQS2006	Atlantic	TEXAQS		10	9	2006		29.6833	-95.0062							0.27664	19.2864
Alex Baker	Atlantic	M68/3	M03	15	7	2006		17.8702	-25.335					17.9997	-23.8078	13.9088	28.094
Alex Baker	Atlantic	M68/3	M04	16	7	2006		17.9955	-23.0072					17.996	-21.0012	29.4302	87.7919
Alex Baker	Atlantic	M68/3	M05	17	7	2006		17.996	-21.0012					18.0002	-19.0168	26.2943	92.2603
Alex Baker	Atlantic	M68/3	M06	18	7	2006		18.0002	-19.0168					18	-17.0033	25.4912	67.55
Alex Baker	Atlantic	M68/3	M07	19	7	2006		18	-17.0035					18.1453	-16.5088	28.2	40.8648
Alex Baker	Atlantic	M68/3	M08	20	7	2006		18.151	-16.5147					18.5067	-16.501	35.5006	43.4278
Alex Baker	Atlantic	M68/3	M09	21	7	2006		18.5067	-16.501							59.775	71.1314
Alex Baker	Atlantic	M68/3	M10	22	7	2006		18.5223	-17.8022					18.5453	-19.0398	21.4376	53.4141
Alex Baker	Atlantic	M68/3	M11	23	7	2006		18.5453	-19.0398					19.0058	-16.636	26.2053	29.8256
Alex Baker	Atlantic	M68/3	M12	24	7	2006		19.113	-16.6233					19.4983	-18.9807	21.0069	29.2024
Alex Baker	Atlantic	M68/3	M13	25	7	2006		19.4983	-18.9807					19.9302	-18.1712	27.304	27.1857
Alex Baker	Atlantic	M68/3	M14	26	7	2006		19.9302	-18.1712					20.3405	-17.597	25.8804	41.8596
Alex Baker	Atlantic	M68/3	M15	27	7	2006		20.3652	-17.5603					19.7473	-17.0358	36.8379	42.5173
Alex Baker	Atlantic	M68/3	M16	28	7	2006		19.753	-17.0495					18.1823	-16.5092	37.7236	35.5146
Alex Baker	Atlantic	M68/3	M17	29	7	2006		18.1835	-16.4018					18.4922	-17.017	25.8662	25.4899
Alex Baker	Atlantic	M68/3	M18	30	7	2006		18.4902	-17.0238					18.25	-17.925	36.2955	23.6857
Alex Baker	Atlantic	M68/3	M19	31	7	2006		18.2503	-18.0015					19.4623	-20.4635	23.6139	21.7565
Alex Baker	Atlantic	M68/3	M20	1	8	2006		19.5268	-20.5235					20.0032	-21.0067	14.9563	20.4296
Alex Baker	Atlantic	M68/3	M21	2	8	2006		19.9967	-20.9998					22.3963	-20.525	14.7522	18.6749
Alex Baker	Atlantic	M68/3	M22	3	8	2006		22.4357	-20.5185					25.5043	-19.1487	13.8697	11.7431
Alex Baker	Atlantic	M68/3	M23	4	8	2006		25.543	-19.082					26.8142	-16.9168	14.0118	5.0573
Alex Baker	Atlantic	P348	TM01	14	2	2007		17.1	-24.8					18	-22.5	20.0535	0.749914
Alex Baker	Atlantic	P348	TM02	15	2	2007		18	-22.5					18	-20.7	30.0817	2.04148
Alex Baker	Atlantic	P348	TM03	16	2	2007		18	-20.7					18	-19	13.3015	999
Alex Baker	Atlantic	P348	TM04	17	2	2007		18	-19					18	-17.5	32.2022	6.69233
Alex Baker	Atlantic	P348	TM05	18	2	2007		18	-17.5					18.5	-16.5	10.8179	999
Alex Baker	Atlantic	P348	TM06	19	2	2007		18.5	-16.5					18.8	-18	11.423	3.3712
Alex Baker	Atlantic	P348	TM07	20	2	2007		18.8	-18					19.1	-16.5	9.58734	2.34093
Alex Baker	Atlantic	P348	TM08	21	2	2007		19.1	-16.6					20	-18	14.3304	1.42424
Alex Baker	Atlantic	P348	TM09	22	2	2007		20	-18					20.8	-17.4	10.2226	10.702
Alex Baker	Atlantic	P348	TM10	23	2	2007		20.9	-17.4					23.2	-17.2	14.311	6.64082
Alex Baker	Atlantic	P348	TM11	24	2	2007		23.2	-17.2					25.6	-16.2	15.0944	9.59141
Samuel Morin	Atlantic	ANT23-10	070414S	13	4	2007	23:45:00	-27.85	11.96							5.46601	999
Samuel Morin	Atlantic	ANT23-10	070415S	15	4	2007	00:00:00	-23.36	7.94							19.5462	999
Samuel Morin	Atlantic	ANT23-10	070416S	16	4	2007	00:00:00	-18.89	4.21							8.9646	999
Samuel Morin	Atlantic	ANT23-10	070417S	16	4	2007	23:40:00	-14.6	0.72							17.7203	999
Samuel Morin	Atlantic	ANT23-10	070418S	17	4	2007	23:10:00	-10.41	-2.62							11.9935	999
Samuel Morin	Atlantic	ANT23-10	070419S	18	4	2007	23:05:00	-6.14	-5.98							16.5864	999
Samuel Morin	Atlantic	ANT23-10	070420S	19	4	2007	22:35:00	-2.12	-9.34							15.6179	999
Samuel Morin	Atlantic	ANT23-10	070421S	20	4	2007	22:05:00	1.86	-12.81							8.50512	999
Samuel Morin	Atlantic	ANT23-10	070422S	21	4	2007	22:10:00	5.68	-16.14							31.2817	999
Samuel Morin	Atlantic	ANT23-10	070423S	22	4	2007	22:05:00	9.46	-19.16							29.1333	999
Samuel Morin	Atlantic	ANT23-10	070424S	23	4	2007	22:05:00	13.95	-20.35							39.9774	999
Samuel Morin	Atlantic	ANT23-10	070425S	24	4	2007	22:05:00	18.76	-20.63							46.2888	999
Samuel Morin	Atlantic	ANT23-10	070426S	25	4	2007	22:05:00	23.4	-19.98							44.1102	999
Samuel Morin	Atlantic	ANT23-10	070427S	26	4	2007	20:45:00	26.57	-16.85							59.9516	999
Samuel Morin	Atlantic	ANT23-10	070427SB	27	4	2007	13:15:00	28.14	-15.4							12.4332	999
Samuel Morin	Atlantic	ANT23-10	070428S	28	4	2007	03:35:00	29.66	-14.51							38.768	999
Samuel Morin	Atlantic	ANT23-10	070429S	29	4	2007	00:00:00	33.59	-13.27							34.9849	999
Samuel Morin	Atlantic	ANT23-10	070430S	29	4	2007	23:55:00	38.63	-11.98							9.6639	999
Samuel Morin	Atlantic	ANT23-10	070501S	1	5	2007	00:05:00	43.41	-10.47							8.34142	999
Samuel Morin	Atlantic	ANT23-10	070502S	1	5	2007	21:15:00	47.19	-7.47							58.3374	999
Samuel Morin	Atlantic	ANT23-10	070503S	2	5	2007	18:25:00	49.81	-2.2							105.48	999
Samuel Morin	Atlantic	ANT23-10	070504S	3	5	2007	18:20:00	52.45	3.71							78.3429	999
Alex Baker	Atlantic	RMB	I02	22	5	2007		27.182	-17.019					22.706	-20.572	8.49609	7.57242
Alex Baker	Atlantic	RMB	I03	23	5	2007		22.289	-20.898					19.178	-23.304	7.55881	7.77324
Alex Baker	Atlantic	RMB	I05	25	5	2007		17.007	-24.815					17.235	-21.452	10.9576	13.5086
Alex Baker	Atlantic	RMB	I06	26	5	2007		17.244	-21.322					17.158	-19.265	15.6244	12.2612
Alex Baker	Atlantic	RMB	I07	27	5	2007		17.14	-19.118					17.835	-17.605	33.1735	22.9902
Alex Baker	Atlantic	RMB	I08	28	5	2007		17.879	-17.918					16.502	-20.938	19.6872	16.0172
Alex Baker	Atlantic	RMB	I09	29	5	2007		16.504	-20.898					16.588	-16.876	25.4534	17.6971
Alex Baker	Atlantic	RMB	I10	30	5	2007		16.6	-16.753					17.9313	-16.3968	30.9668	17.2752
Alex Baker	Atlantic	RMB	I11	31	5	2007		18.0417	-16.3628					19.0135	-16.6392	32.9609	23.914
Alex Baker	Atlantic	RMB	I12	1	6	2007		19.2068	-16.7627					21.8464	-17.8217	34.6008	27.5201
Alex Baker	Atlantic	RMB	I13	2	6	2007		21.9936	-17.6332					25.0159	-17.392	36.5968	16.473
Alex Baker	Atlantic	RMB	I14	3	6	2007		25.0995	-17.2976					28.5171	-15.7618	32.2024	28.0649
Alex Baker	Atlantic	RMB	I15	4	6	2007		28.6473	-15.668					31.1288	-14.8503	17.0741	24.7448
Alex Baker	Atlantic	RMB	I16	5	6	2007		31.3086	-14.7903					35.0452	-13.5141	23.9116	6.72251
Alex Baker	Atlantic	RMB	I17	6	6	2007		35.344	-13.4099					38.619	-12.2377	31.7093	16.2929
Alex Baker	Atlantic	NAI07	tm03	7	8	2007		59.3	-19.47					59.72	-20.31	8.37265	12.0982
Alex Baker	Atlantic	NAI07	tm04	8	8	2007		59.72	-20.18					59.87	-21.01	2.77981	5.50748
Alex Baker	Atlantic	NAI07	tm05	9	8	2007		59.87	-21.01					60	-19.42	4.44821	5.94629
Alex Baker	Atlantic	NAI07	tm06	10	8	2007		60	-19.42					59.23	-18.72	5.01752	7.52242
Alex Baker	Atlantic	NAI07	tm07	11	8	2007		58.8	-19.1					59.81	-19.1	4.15824	3.4577
Alex Baker	Atlantic	NAI07	tm08	12	8	2007		59.81	-19.1					58.81	-19.86	2.36337	5.07387
Alex Baker	Atlantic	NAI07	tm09	13	8	2007		58.81	-19.86					59.59	-19.83	4.33225	3.13946
Alex Baker	Atlantic	NAI07	tm10	14	8	2007		59.59	-19.83					59.6	-20.52	5.54092	2.74424
Alex Baker	Atlantic	NAI07	tm11	16	8	2007		59.6	-20.52					59.6	-18.91	7.96079	3.27091
Alex Baker	Atlantic	NAI07	tm12	17	8	2007		59.6	-18.91					59.44	-19.07	6.29253	3.22197
Alex Baker	Atlantic	NAI07	tm13	18	8	2007		59.44	-19.07					59.15	-20.29	5.19426	5.54921
Alex Baker	Atlantic	NAI07	tm14	19	8	2007		59.15	-20.29					59.28	-19.66	3.93498	3.97797
Alex Baker	Atlantic	NAI07	tm15	20	8	2007		59.28	-19.66					60.54	-19.02	11.6188	16.3474
Alex Baker	Atlantic	NAI07	tm19	26	8	2007		62.55	-19.74					59.77	-17.91	3.22398	4.48747
Alex Baker	Atlantic	NAI07	tm20	27	8	2007		59.77	-17.91					59.65	-13.9	4.92818	3.86101
Alex Baker	Atlantic	NAI07	tm21	28	8	2007		59.6	-13.75					57.45	-11.1	5.37249	5.33981
Fudan University	Atlantic	M/V Oceanic II,http://en.wikipedia.org/wiki/The_Scholar_Ship	V1(1)	19	9	2007	19:00:00	38.7172	-9.117	20	9	2007	18:00:00	36.6835	-15.1345	64.1706	999
Fudan University	Atlantic	M/V Oceanic II,http://en.wikipedia.org/wiki/The_Scholar_Ship	V1(2)	20	9	2007	18:00:00	36.6835	-15.1345	21	9	2007	17:45:00	34.3498	-21.8143	26.5326	999
Fudan University	Atlantic	M/V Oceanic II,http://en.wikipedia.org/wiki/The_Scholar_Ship	V1(3)	21	9	2007	17:45:00	34.3498	-21.8143	22	9	2007	18:00:00	31.9462	-28.5128	3.08691	999
Fudan University	Atlantic	M/V Oceanic II,http://en.wikipedia.org/wiki/The_Scholar_Ship	V1(4)	22	9	2007	18:00:00	31.9462	-28.5128	23	9	2007	18:00:00	29.5892	-34.9067	10.5999	999
Fudan University	Atlantic	M/V Oceanic II,http://en.wikipedia.org/wiki/The_Scholar_Ship	V1(5)	23	9	2007	18:00:00	29.5892	-34.9067	24	9	2007	18:00:00	27.1062	-41.4663	10.9378	999
Fudan University	Atlantic	M/V Oceanic II,http://en.wikipedia.org/wiki/The_Scholar_Ship	V1(6)	24	9	2007	18:00:00	27.1062	-41.4663	25	9	2007	18:00:00	24.1788	-49.0593	6.82741	999
Fudan University	Atlantic	M/V Oceanic II,http://en.wikipedia.org/wiki/The_Scholar_Ship	V1(7)	25	9	2007	18:00:00	24.1788	-49.0593	26	9	2007	17:25:00	21.7238	-56.5855	5.8774	999
Fudan University	Atlantic	M/V Oceanic II,http://en.wikipedia.org/wiki/The_Scholar_Ship	V1(8)	26	9	2007	17:25:00	21.7238	-56.5855	27	9	2007	18:00:00	19.07	-63.92	12.2897	999
Fudan University	Atlantic	M/V Oceanic II,http://en.wikipedia.org/wiki/The_Scholar_Ship	V1(9)	27	9	2007	18:00:00	19.07	-63.92	28	9	2007	17:50:00	16.33	-67.5	9.18511	999
Fudan University	Atlantic	M/V Oceanic II,http://en.wikipedia.org/wiki/The_Scholar_Ship	V1(10)	28	9	2007	17:50:00	16.33	-67.5	29	9	2007	17:50:00	14.3	-71.33	10.5787	999
Fudan University	Atlantic	M/V Oceanic II,http://en.wikipedia.org/wiki/The_Scholar_Ship	V1(11)	29	9	2007	17:50:00	14.3	-71.33	30	9	2007	17:50:00	11.62	-75.27	27.9456	999
Fudan University	Atlantic	M/V Oceanic II,http://en.wikipedia.org/wiki/The_Scholar_Ship	V1(12)	30	9	2007	17:50:00	11.62	-75.27	2	10	2007	02:20:00	10.83	-77.57	12.3891	999
Fudan University	Atlantic	M/V Oceanic II,http://en.wikipedia.org/wiki/The_Scholar_Ship	V1(13)	2	10	2007	02:20:00	10.83	-77.57	3	10	2007	02:19:00	10.83	-77.57	7.07733	999
Fudan University	Atlantic	M/V Oceanic II,http://en.wikipedia.org/wiki/The_Scholar_Ship	V1(14)	3	10	2007	02:19:00	10.83	-77.57	4	10	2007	02:00:00	10.83	-77.57	11.3729	999
Fudan University	Atlantic	M/V Oceanic II,http://en.wikipedia.org/wiki/The_Scholar_Ship	V1(15)	7	10	2007	19:15:00	10.83	-77.57	8	10	2007	23:50:00	4.72	-80.2	4.37268	999
Alex Baker	Atlantic	INSPIRE	01AF	17	11	2007		17.6945	-22.7773					17.543	-22.8352	25.1043	0.562672
Alex Baker	Atlantic	INSPIRE	02AF	19	11	2007		17.5432	-22.838					17.5112	-22.888	17.3314	0.541799
Alex Baker	Atlantic	INSPIRE	03AF	22	11	2007		16.8963	-24.8325					16.8998	-24.845	6.56301	1.37637
Alex Baker	Atlantic	INSPIRE	04AF	23	11	2007		16.8953	-24.8395					16.9035	-24.8425	11.2547	1.55267
Alex Baker	Atlantic	INSPIRE	05AF	24	11	2007		16.8915	-24.8368					16.8927	-24.8322	16.2932	1.65741
Alex Baker	Atlantic	INSPIRE	06AF	25	11	2007		17.009	-24.7117					17.0105	-24.7057	14.7523	1.7584
Alex Baker	Atlantic	INSPIRE	07AF	28	11	2007		16.0062	-23.6658					16.0212	-23.7283	27.936	1.51705
Alex Baker	Atlantic	INSPIRE	08AF	29	11	2007		16.0153	-23.7333					16.0172	-23.7752	25.3921	1.17504
Alex Baker	Atlantic	INSPIRE	09AF	30	11	2007		16.0152	-23.7842					15.9448	-23.878	19.2472	1.19069
Alex Baker	Atlantic	INSPIRE	10AF	2	12	2007		17.6848	-22.893					17.7538	-22.914	21.2814	1.52917
Alex Baker	Atlantic	INSPIRE	12AF	4	12	2007		17.8022	-23.0098					17.8193	-23.2402	18.7198	3.78908
Alex Baker	Atlantic	INSPIRE	13AF	6	12	2007		20.538	-25.035					20.749	-24.9948	22.9854	2.28996
Alex Baker	Atlantic	INSPIRE	14AF	7	12	2007		20.749	-24.9948					20.9875	-25.0522	32.08	2.70291
Alex Baker	Atlantic	INSPIRE	15AF	8	12	2007		21.0045	-25.0503					21.9618	-24.8303	26.0247	1.74683
Alex Baker	Atlantic	INSPIRE	16AF	10	12	2007		22.121	-24.7988					26.0013	-23.9988	30.266	1.52468
Alex Baker	Atlantic	INSPIRE	20AF	14	12	2007		26.1965	-23.9885					26.2883	-23.5723	19.4598	1.66576
Alex Baker	Atlantic	INSPIRE	21AF	15	12	2007		26.2897	-23.506					26.9672	-19.2638	35.5026	1.55533
Alex Baker	Atlantic	JC18	AI03	5	12	2007		16.6782	-61.9652					16.6553	-62.0372	4.00098	4.04672
Alex Baker	Atlantic	JC18	AI04	6	12	2007		16.6367	-62.0333					16.3222	-61.5812	2.97491	2.02918
Alex Baker	Atlantic	JC18	AI05	7	12	2007		16.3222	-61.5812					16.248	-61.545	1.85134	1.89486
Alex Baker	Atlantic	JC18	AI06	8	12	2007		16.4134	-61.9082					16.6068	-62.3544	5.75112	9.33026
Alex Baker	Atlantic	JC18	AI07	10	12	2007		16.3641	-62.2127					16.25	-62.4999	7.85643	5.17081
Alex Baker	Atlantic	JC18	AI09	11	12	2007		16.25	-62.4999					16.3106	-62.3408	6.87854	4.03182
Alex Baker	Atlantic	JC18	AI10	12	12	2007		16.3248	-62.3549					16.4432	-62.2925	3.33235	2.47491
Alex Baker	Atlantic	JC18	AI11	13	12	2007		16.4432	-62.2925					16.3964	-61.572	2.98823	1.70677
Alex Baker	Atlantic	D326	TM007	9	1	2008		24.906	-21.2855					25.31	-22.938	19.216	21.617
Alex Baker	Atlantic	D326	TM008	10	1	2008		25.7415	-24.719					26.149	-26.413	5.67911	6.38069
Alex Baker	Atlantic	D326	TM009	11	1	2008		26.508	-27.9285					26.867	-29.444	2.06112	5.26514
Alex Baker	Atlantic	D326	TM010	12	1	2008		25.983	-28.997					25.077	-28.475	1.95463	3.32164
Alex Baker	Atlantic	D326	TM011	13	1	2008		23.9545	-27.837					22.831	-27.197	1.83098	2.97834
Alex Baker	Atlantic	D326	TM012	14	1	2008		21.5975	-26.512					20.364	-25.827	8.54739	16.0438
Alex Baker	Atlantic	D326	TM013	15	1	2008		19.4235	-25.311					18.483	-24.795	9.3631	19.9419
Alex Baker	Atlantic	D326	TM014	16	1	2008		18.068	-24.5485					17.653	-24.302	9.05747	17.2242
Alex Baker	Atlantic	D326	TM015	17	1	2008		16.3505	-24.894					15.035	-25.485	9.57107	19.2511
Alex Baker	Atlantic	D326	TM016	18	1	2008		13.846	-25.6875					12.657	-25.89	8.19875	14.1151
Alex Baker	Atlantic	D326	TM017	19	1	2008		12.6435	-26.811					12.63	-27.732	9.0403	2.72342
Alex Baker	Atlantic	D326	TM019	21	1	2008		12.554	-31.9215					12.53	-33.239	8.39487	6.16504
Alex Baker	Atlantic	D326	TM021	23	1	2008		12.568	-33.992					12.595	-32.678	2.32726	0.206116
Alex Baker	Atlantic	D326	TM022	24	1	2008		12.546	-31.6305					12.504	-30.647	2.54054	0.314522
Alex Baker	Atlantic	D326	TM024	26	1	2008		16.1575	-30.64					16.19	-30.645	4.0952	5.59127
Alex Baker	Atlantic	D326	TM026(A)	27	1	2008		16.2135	-30.6475					16.205	-30.638	8.2985	4.33079
Alex Baker	Atlantic	D326	TM028	29	1	2008		17.7755	-27.6825					18.963	-26.732	15.8616	0.276646
Alex Baker	Atlantic	D326	TM029	31	1	2008		20.888	-26.9635					22.642	-27.175	13.8489	1.1522
Alex Baker	Atlantic	ZD	tm01	12	2	2008	10:40:00	-38.872	11.545	14	2	2008	16:10:00	-43.417	8.117	1.92846	0.324743
Alex Baker	Atlantic	ZD	tm02	14	2	2008	16:15:00	-43.417	8.132	16	2	2008	18:30:00	-47.308	4.603	2.09313	0.344608
Alex Baker	Atlantic	ZD	tm03	16	2	2008	18:40:00	-47.308	4.603	19	2	2008	08:45:00	-51.493	0.008	0.678804	2.79344
Alex Baker	Atlantic	ZD	tm04	19	2	2008	08:50:00	-51.495	0.005	21	2	2008	13:55:00	-54.506	0.026	2.00778	5.60872
Alex Baker	Atlantic	ZD	tm05	21	2	2008	14:00:00	-54.506	0.026	24	2	2008	13:45:00	-59.003	0.02	0.199089	3.89043
Alex Baker	Atlantic	ZD	tm06	25	2	2008	16:30:00	-59.365	0.026	27	2	2008	18:48:00	-62.668	-0.0004	0.283457	5.321
Alex Baker	Atlantic	ZD	tm07	27	2	2008	19:14:00	-62.831	-0.0003	29	2	2008	13:45:00	-65.82	-0.465	0.594947	3.07293
Alex Baker	Atlantic	ZD	tm08	29	2	2008	20:07:00	-65.874	-0.55	2	3	2008	08:00:00	-70.568	-8.137	1.10207	1.33567
Alex Baker	Atlantic	ZD	tm10	8	3	2008	12:45:00	-66.027	0.112	10	3	2008	19:20:00	-68.875	0.003	0.317901	0.885699
Alex Baker	Atlantic	ZD	tm11	10	3	2008	19:30:00	-68.883	-0.0004	13	3	2008	11:30:00	-69	-6.992	0.393439	3.05848
Alex Baker	Atlantic	ZD	tm12	13	3	2008	11:40:00	-69	-6.99	16	3	2008	10:45:00	-68.18	-19.547	1.31357	2.93887
Alex Baker	Atlantic	ZD	tm13	16	3	2008	11:10:00	-68.148	-19.662	19	3	2008	13:25:00	-66.578	-27.41	1.21194	3.06018
Alex Baker	Atlantic	ZD	tm14	19	3	2008	13:40:00	-66.578	-27.41	22	3	2008	10:46:00	-65.117	-40.322	0.564824	1.51445
Alex Baker	Atlantic	ZD	tm15	22	3	2008	16:50:00	-65.102	-40.455	24	3	2008	21:30:00	-64.3	-46.651	0.431632	6.02041
Alex Baker	Atlantic	ZD	tm16	26	3	2008	16:30:00	-63.878	-49.148	29	3	2008	11:15:00	-63.328	-52.809	1.10495	3.81937
Alex Baker	Atlantic	ZD	tm17	29	3	2008	11:40:00	-63.325	-52.818	2	4	2008	11:30:00	-60.265	-54.822	0.985286	2.85689
Alex Baker	Atlantic	ZD	tm18	2	4	2008	11:45:00	-60.262	-54.827	4	4	2008	15:45:00	-59.552	-56.63	0.75335	3.05975
Alex Baker	Atlantic	ZD	tm19	4	4	2008	15:55:00	-59.555	-56.645	7	4	2008	11:08:00	-57.627	-60.912	1.52523	22.3379
Alex Baker	Atlantic	ZD	tm20	7	4	2008	21:20:00	-57.634	-60.883	10	4	2008	14:45:00	-56.12	-63.71	0.814108	3.32143
Alex Baker	Atlantic	ZD	tm21	10	4	2008	15:06:00	-56.117	-63.7	12	4	2008	20:08:00	-55.128	-65.533	0.316492	4.031
Alex Baker	Atlantic	BGH	M01	13	2	2008		-33.9779	17.9945					-33.9912	16.9462	33.8088	15.3796
Alex Baker	Atlantic	BGH	M02	14	2	2008		-33.9955	16.8718					-34.0928	15.1623	5.12818	5.18685
Alex Baker	Atlantic	BGH	M03	16	2	2008		-34.0928	15.1623					-36.4423	13.1739	2.75804	3.35884
Alex Baker	Atlantic	BGH	M04	22	2	2008		-36.5863	13.0566					-40.7232	10.2145	1.70072	2.56661
Alex Baker	Atlantic	BGH	M05	25	2	2008		-40.7232	10.2145					-42.8948	8.57233	1.93963	2.62321
Alex Baker	Atlantic	BGH	M06	29	2	2008		-44.041	7.63133					-47.5542	4.37717	1.34416	1.05589
Alex Baker	Atlantic	BGH	M07	6	3	2008		-48.3208	3.58433					-51.851	0.00633333	1.00286	1.60777
Alex Baker	Atlantic	BGH	M08	12	3	2008		-53.0069	-0.00633333					-57.5523	-0.0375	0.765114	1.38097
Fudan University	Atlantic	M/V Oceanic II,http://en.wikipedia.org/wiki/The_Scholar_Ship	V2(1)	4	3	2008	17:48:00	-33.9	18.417	5	3	2008	17:45:00	-30.03	14.517	22.5118	1.42274
Fudan University	Atlantic	M/V Oceanic II,http://en.wikipedia.org/wiki/The_Scholar_Ship	V2(2)	5	3	2008	17:58:59	-30.017	14.533	6	3	2008	17:42:00	-25.1	9.817	15.9845	0.901589
Fudan University	Atlantic	M/V Oceanic II,http://en.wikipedia.org/wiki/The_Scholar_Ship	V2(3)	6	3	2008	17:54:40	-25.067	9.8	7	3	2008	05:40:00	-22.633	7.55	39.4223	2.00681
Fudan University	Atlantic	M/V Oceanic II,http://en.wikipedia.org/wiki/The_Scholar_Ship	V2(4)	7	3	2008	05:46:30	-22.6	7.517	7	3	2008	17:35:00	-20.083	5.317	26.3864	1.74485
Fudan University	Atlantic	M/V Oceanic II,http://en.wikipedia.org/wiki/The_Scholar_Ship	V2(5)	7	3	2008	17:43:26	-20.05	5.283	8	3	2008	05:36:00	-17.533	3.067	24.2156	999
Fudan University	Atlantic	M/V Oceanic II,http://en.wikipedia.org/wiki/The_Scholar_Ship	V2(6)	8	3	2008	05:49:00	-17.483	3.017	8	3	2008	17:41:00	-14.967	0.867	13.6841	999
Fudan University	Atlantic	M/V Oceanic II,http://en.wikipedia.org/wiki/The_Scholar_Ship	V2(7)	8	3	2008	17:47:47	-14.967	0.867	9	3	2008	05:42:00	-12.433	-1.233	10.1123	999
Fudan University	Atlantic	M/V Oceanic II,http://en.wikipedia.org/wiki/The_Scholar_Ship	V2(9)	9	3	2008	17:46:00	-9.967	-3.317	10	3	2008	05:45:00	-7.5	-6.367	5.95255	999
Fudan University	Atlantic	M/V Oceanic II,http://en.wikipedia.org/wiki/The_Scholar_Ship	V2(10)	10	3	2008	05:55:00	-7.45	-5.4	10	3	2008	17:45:00	-4.967	-7.483	21.3949	999
Fudan University	Atlantic	M/V Oceanic II,http://en.wikipedia.org/wiki/The_Scholar_Ship	V2(11)	10	3	2008	17:46:00	-4.957	-7.483	11	3	2008	05:45:00	-2.433	-9.567	4.89779	999
Fudan University	Atlantic	M/V Oceanic II,http://en.wikipedia.org/wiki/The_Scholar_Ship	V2(12)	11	3	2008	05:55:00	-2.4	-9.6	11	3	2008	17:50:00	0.083	-11.65	24.8831	999
Fudan University	Atlantic	M/V Oceanic II,http://en.wikipedia.org/wiki/The_Scholar_Ship	V2(13)	11	3	2008	17:56:00	0.1	-11.667	12	3	2008	05:51:00	2.617	-17.733	14.6195	999
Fudan University	Atlantic	M/V Oceanic II,http://en.wikipedia.org/wiki/The_Scholar_Ship	V2(15)	12	3	2008	17:47:00	5	-15.717	13	3	2008	05:40:00	7.433	-17.717	33.5808	999
Fudan University	Atlantic	M/V Oceanic II,http://en.wikipedia.org/wiki/The_Scholar_Ship	V2(16)	13	3	2008	05:50:00	7.467	-17.75	13	3	2008	17:47:00	9.833	-19.733	15.8966	999
Fudan University	Atlantic	M/V Oceanic II,http://en.wikipedia.org/wiki/The_Scholar_Ship	V2(17)	13	3	2008	17:55:00	9.85	-19.75	14	3	2008	05:34:00	12.117	-21.633	23.5115	999
Fudan University	Atlantic	M/V Oceanic II,http://en.wikipedia.org/wiki/The_Scholar_Ship	V2(18)	14	3	2008	05:43:00	12.15	-21.667	14	3	2008	17:45:00	14.433	-23.6	23.3839	999
Fudan University	Atlantic	M/V Oceanic II,http://en.wikipedia.org/wiki/The_Scholar_Ship	V2(19)	14	3	2008	17:58:00	14.467	-23.633	15	3	2008	05:40:00	16.683	-25.183	20.4391	999
Fudan University	Atlantic	M/V Oceanic II,http://en.wikipedia.org/wiki/The_Scholar_Ship	V2(20)	15	3	2008	05:50:00	16.683	-25.233	15	3	2008	21:45:00	16.883	-25	18.3451	999
Fudan University	Atlantic	M/V Oceanic II,http://en.wikipedia.org/wiki/The_Scholar_Ship	V2(21)	15	3	2008	21:50:00	16.883	-25	16	3	2008	05:33:00	18.05	-23.833	26.0773	999
Fudan University	Atlantic	M/V Oceanic II,http://en.wikipedia.org/wiki/The_Scholar_Ship	V2(22)	16	3	2008	05:45:00	18.183	-23.8	16	3	2008	18:02:00	20.45	-21.4	25.5151	999
Fudan University	Atlantic	M/V Oceanic II,http://en.wikipedia.org/wiki/The_Scholar_Ship	V2(23)	16	3	2008	18:09:00	20.65	-21.383	17	3	2008	05:35:00	22.967	-19.083	27.2639	999
Fudan University	Atlantic	M/V Oceanic II,http://en.wikipedia.org/wiki/The_Scholar_Ship	V2(43)	20	3	2008	17:43:00	38.7	0.467	21	3	2008	06:34:00	41.367	2.183	51.3258	999
PMEL	Atlantic	ICEALOT	1	18	3	2008		41.5234	-70.6718							19.0484	35.9444
PMEL	Atlantic	ICEALOT	2	20	3	2008		41.106	-73.1632							0.322581	20.8333
PMEL	Atlantic	ICEALOT	3	21	3	2008		41.1924	-72.9611							7.70968	28
PMEL	Atlantic	ICEALOT	4	21	3	2008		41.1957	-72.9737							1.67742	31.6667
PMEL	Atlantic	ICEALOT	5	22	3	2008		42.0655	-67.5578							4.8871	14.0556
PMEL	Atlantic	ICEALOT	6	23	3	2008		42.7634	-62.7284							3.82258	35.6111
PMEL	Atlantic	ICEALOT	7	24	3	2008		43.9139	-56.0897							4.01613	16.1111
PMEL	Atlantic	ICEALOT	8	24	3	2008		44.2424	-53.1926							5.09677	14.4444
PMEL	Atlantic	ICEALOT	9	25	3	2008		44.6579	-50.0043							1.25806	10.8889
PMEL	Atlantic	ICEALOT	10	25	3	2008		45.0943	-47.379							0.354839	999
PMEL	Atlantic	ICEALOT	11	26	3	2008		47.6645	-42.5055							0.596774	5.22222
PMEL	Atlantic	ICEALOT	12	27	3	2008		50.439	-37.9134							1.17742	8.72222
PMEL	Atlantic	ICEALOT	13	28	3	2008		53.5033	-32.5739							0.693548	7.33333
PMEL	Atlantic	ICEALOT	14	29	3	2008		56.0074	-27.7879							0.870968	2.77778
PMEL	Atlantic	ICEALOT	15	30	3	2008		58.6278	-22.6056							1.19355	19.2778
PMEL	Atlantic	ICEALOT	16	31	3	2008		61.4122	-16.5779							0.870968	3.16667
PMEL	Atlantic	ICEALOT	17	1	4	2008		64.427	-8.14793							0.887097	6.27778
PMEL	Atlantic	ICEALOT	18	2	4	2008		66.8277	1.24164							0.790323	6.05556
PMEL	Atlantic	ICEALOT	19	3	4	2008		68.1618	7.56449							0.919355	8.38889
PMEL	Atlantic	ICEALOT	20	3	4	2008		66.8645	1.41115							0.83871	9.22222
PMEL	Atlantic	ICEALOT	21	4	4	2008		68.1373	7.4431							2.91935	8.16667
PMEL	Atlantic	ICEALOT	22	4	4	2008		68.9622	11.6613							2.25806	7.55556
PMEL	Atlantic	ICEALOT	23	5	4	2008		70.2105	16.5686							2.45161	999
PMEL	Atlantic	ICEALOT	24	5	4	2008		70.4371	18.2262							0.258065	2.27778
PMEL	Atlantic	ICEALOT	25	6	4	2008		70.501	18.7536							0.129032	8.16667
PMEL	Atlantic	ICEALOT	26	6	4	2008		70.6811	20.6013							0.112903	3.88889
PMEL	Atlantic	ICEALOT	27	7	4	2008		71.2125	23.9313							0.0806452	2.38889
PMEL	Atlantic	ICEALOT	28	7	4	2008		71.1309	27.1468							0.548387	8.88889
PMEL	Atlantic	ICEALOT	29	8	4	2008		70.8042	29.9586							0.83871	12.1667
PMEL	Atlantic	ICEALOT	30	8	4	2008		69.9192	30.3289							2.16129	10.3889
PMEL	Atlantic	ICEALOT	31	9	4	2008		70.4446	31.2958							999	8.77778
PMEL	Atlantic	ICEALOT	32	9	4	2008		71.2323	24.4351							0.483871	10.1111
PMEL	Atlantic	ICEALOT	33	10	4	2008		70.2699	17.6385							0.532258	12.3333
PMEL	Atlantic	ICEALOT	34	11	4	2008		70.8134	20.7803							1.33871	12.3889
PMEL	Atlantic	ICEALOT	35	13	4	2008		71.2144	18.2697							0.580645	11.1111
PMEL	Atlantic	ICEALOT	36	14	4	2008		73.5463	13.8017							0.483871	11.5
PMEL	Atlantic	ICEALOT	37	14	4	2008		75.6207	11.3011							0.354839	4.77778
PMEL	Atlantic	ICEALOT	38	15	4	2008		78.1448	8.07872							0.274194	8.61111
PMEL	Atlantic	ICEALOT	39	15	4	2008		80.0264	10.5721							0.33871	2.83333
PMEL	Atlantic	ICEALOT	40	16	4	2008		80.1262	11.2464							999	4.16667
PMEL	Atlantic	ICEALOT	41	16	4	2008		79.0296	11.3841							1.01613	13.9444
PMEL	Atlantic	ICEALOT	42	17	4	2008		79.0299	11.38							999	7.72222
PMEL	Atlantic	ICEALOT	43	17	4	2008		78.6394	6.55259							1.33871	9.16667
PMEL	Atlantic	ICEALOT	44	18	4	2008		77.0505	1.61782							1.46774	10
PMEL	Atlantic	ICEALOT	45	19	4	2008		76.262	-2.54381							1.1129	9.5
PMEL	Atlantic	ICEALOT	46	19	4	2008		74.6016	-6.22595							0.532258	3.77778
PMEL	Atlantic	ICEALOT	47	20	4	2008		71.7121	-7.63944							0.322581	4.77778
PMEL	Atlantic	ICEALOT	48	20	4	2008		70.4977	-9.68128							0.403226	6.38889
PMEL	Atlantic	ICEALOT	49	21	4	2008		70.1787	-16.1443							0.177419	2.72222
PMEL	Atlantic	ICEALOT	50	21	4	2008		69.0981	-15.6591							9.48387	15.8333
PMEL	Atlantic	ICEALOT	51	22	4	2008		66.51	-12.9288							1.6129	5.72222
Alex Baker	Atlantic	ANT24-4	MI01	20	4	2008		-48.5333	-62.35					-45.8667	-58.5	13.7227	39.9386
Alex Baker	Atlantic	ANT24-4	MI02	21	4	2008		-45.8667	-58.5					-39.8333	-50.2667	9.243	33.555
Alex Baker	Atlantic	ANT24-4	MI03	22	4	2008		-39.8333	-50.2667					-36.9167	-46.45	2.37665	3.75319
Alex Baker	Atlantic	ANT24-4	MI04	24	4	2008		-36.7167	-46.2					-30.85	-39.1	6.17102	9.24382
Alex Baker	Atlantic	ANT24-4	MI05	26	4	2008		-30.7833	-39.0667					-26.7	-36.7	15.8362	28.6905
Alex Baker	Atlantic	ANT24-4	MI06	27	4	2008		-26.65	-36.6833					-23.0667	-34.6667	6.21869	1.97752
Alex Baker	Atlantic	ANT24-4	MI08	28	4	2008		-22.95	-34.6167					-19.2167	-32.75	2.17939	1.67235
Alex Baker	Atlantic	ANT24-4	MI09	29	4	2008		-19.1167	-32.7167					-15.2833	-31.15	1.21245	0.905108
Alex Baker	Atlantic	ANT24-4	MI10	30	4	2008		-15.1333	-31.1					-11.3167	-29.5667	3.52277	0.431523
Alex Baker	Atlantic	ANT24-4	MI11	1	5	2008		-11.1667	-29.5167					-7.3	-28	4.08739	3.57767
Alex Baker	Atlantic	ANT24-4	MI12	2	5	2008		-7.2	-27.9667					-3.7	-26.6	7.00664	3.83052
Alex Baker	Atlantic	ANT24-4	MI13	3	5	2008		-3.55	-26.55					0.533333	-25.05	2.72002	2.0443
Alex Baker	Atlantic	ANT24-4	MI14	4	5	2008		0.583333	-25.0333					4.21667	-24.2667	4.20974	4.25011
Alex Baker	Atlantic	ANT24-4	MI15	5	5	2008		4.21667	-24.2667					7.83333	-23.4833	43.0081	11.1874
Alex Baker	Atlantic	ANT24-4	MI16	6	5	2008		7.9	-23.0333					11.8667	-22.6167	24.4523	4.49653
Alex Baker	Atlantic	ANT24-4	MI17	7	5	2008		11.9	-22.6					15.8667	-21.7333	18.2585	4.14577
Alex Baker	Atlantic	ANT24-4	MI18	8	5	2008		15.8667	-21.7333					19.9167	-20.8333	5.72847	6.77331
Alex Baker	Atlantic	ANT24-4	MI19	9	5	2008		19.9167	-20.8333					23.8333	-20.05	9.64036	6.54328
Alex Baker	Atlantic	ANT24-4	MI20	10	5	2008		23.8333	-20.05					26.3333	-17.2167	11.4168	7.58657
Alex Baker	Atlantic	ANT24-4	MI22	12	5	2008		28.5167	-15.1333					32.8833	-14.0333	18.3693	5.85663
Alex Baker	Atlantic	ANT24-4	MI23	13	5	2008		32.8833	-14.0333					36.7	-12.6667	6.36837	3.62443
Alex Baker	Atlantic	ANT24-4	MI24	14	5	2008		36.7167	-12.6667					40.9667	-10.6	8.33966	9.11362
Alex Baker	Atlantic	ANT24-4	MI25	15	5	2008		40.9667	-10.6					44.9	-8.5	25.1188	7.43135
Alex Baker	Atlantic	ANT24-4	MI26	16	5	2008		45.05	-8.38333					48.8167	-5.41667	42.0165	27.359
Alex Baker	Atlantic	ANT24-4	MI27	17	5	2008		48.8333	-5.35					50.4333	0.816667	71.3159	42.4067
Alex Baker	Atlantic	AMT18	I01	7	10	2008	16:30:00	46.34	-18.97	17	10	2008	15:40:00	45.32	-19.91	3.93321	2.82794
Alex Baker	Atlantic	AMT18	I02	8	10	2008	16:10:00	45.05	-20.13	18	10	2008	13:41:00	43.07	-23.62	17.9824	5.16763
Alex Baker	Atlantic	AMT18	I03	9	10	2008	15:59:00	43.07	-23.62	19	10	2008	13:30:00	37.73	-25.65	12.395	4.1392
Alex Baker	Atlantic	AMT18	I04	10	10	2008	16:18:00	37.73	-25.65	20	10	2008	13:57:00	35.17	-28.6	6.68046	3.06102
Alex Baker	Atlantic	AMT18	I06	12	10	2008	15:57:00	32.37	-31.85	22	10	2008	15:40:00	29.57	-34.96	7.70429	3.52671
Alex Baker	Atlantic	AMT18	I08	14	10	2008	18:00:00	26.51	-38.24	24	10	2008	14:58:00	21.6	-39.5	14.079	9.23888
Alex Baker	Atlantic	AMT18	I09	16	10	2008	16:00:00	21.6	-39.5	25	10	2008	14:18:00	18.62	-37.45	21.9344	10.4368
Alex Baker	Atlantic	AMT18	I10	17	10	2008	16:17:00	18.62	-37.45	26	10	2008	14:34:00	10.75	-32.1	17.627	5.63778
Alex Baker	Atlantic	AMT18	I11	20	10	2008	16:00:00	10.75	-32.1	27	10	2008	14:00:00	7.58	-30	27.7682	11.9327
Alex Baker	Atlantic	AMT18	I12	21	10	2008	16:30:00	7.58	-30	28	10	2008	14:15:00	4.97	-28.28	12.8412	4.85634
Alex Baker	Atlantic	AMT18	I13	22	10	2008	16:20:00	4.97	-28.28	29	10	2008	14:30:00	1.69	-26.12	13.1095	8.68792
Alex Baker	Atlantic	AMT18	I14	23	10	2008	15:50:00	1.69	-26.12	31	10	2008	15:14:00	-2	-25	13.5776	8.96461
Alex Baker	Atlantic	AMT18	I15	24	10	2008	17:34:00	-2	-25	1	11	2008	17:52:00	-7.05	-25	8.91239	7.43966
Alex Baker	Atlantic	AMT18	I16	25	10	2008	19:29:00	-7.05	-25	2	11	2008	16:16:00	-14.32	-24.98	13.0023	9.42753
Alex Baker	Atlantic	AMT18	I17	27	10	2008	17:48:00	-14.32	-24.98	3	11	2008	17:33:00	-20.52	-24.98	14.0399	9.74285
Alex Baker	Atlantic	AMT18	I18	29	10	2008	19:49:00	-20.52	-24.98	4	11	2008	17:50:00	-26.62	-24.97	10.4447	8.35596
Alex Baker	Atlantic	AMT18	I19	31	10	2008	18:35:00	-26.62	-24.97	6	11	2008	17:27:00	-32	-29.88	3.81581	3.16178
Alex Baker	Atlantic	AMT18	I20	2	11	2008	18:38:00	-32	-29.88	8	11	2008	14:55:00	-36.23	-35.13	2.56088	1.81279
Alex Baker	Atlantic	AMT18	I21	4	11	2008	08:38:00	-36.23	-35.13	10	11	2008	09:38:00	-41.5	-42.15	6.03344	8.82355
Alex Baker	Atlantic	AMT18	I22	6	11	2008	10:37:00	-41.5	-42.15	11	11	2008	09:01:00	-46.73	-49.48	1.91462	5.48617
Alex Baker	Atlantic	24S	I02	7	3	2009	22:26:00	-35.45	-55.13	8	3	2009	22:38:00	-36.67	-53.05	10.4876	999
Alex Baker	Atlantic	24S	I03	9	3	2009	16:49:00	-37.12	-52.37	10	3	2009	13:10:00	-35.18	-50.62	2.84502	999
Alex Baker	Atlantic	24S	I04	10	3	2009	13:45:00	-35.12	-50.58	11	3	2009	13:16:00	-32.2	-49.25	1.73142	999
Alex Baker	Atlantic	24S	I05	11	3	2009	13:50:00	-32.12	-49.22	12	3	2009	13:00:00	-29.86	-46.62	6.22195	999
Alex Baker	Atlantic	24S	I06	12	3	2009	13:40:00	-29.8	-46.53	13	3	2009	15:10:00	-27.42	-43.95	14.7318	999
Alex Baker	Atlantic	24S	I07	13	3	2009	15:53:00	-27.32	-45.95	13	3	2009	22:40:00	-26.8	-43.95	12.7	999
Alex Baker	Atlantic	24S	I08	15	3	2009	13:40:00	-24.55	-44.78	16	3	2009	13:48:00	-23.15	-41	19.4649	999
Alex Baker	Atlantic	24S	I09	16	3	2009	22:12:00	-23.33	-40.78	17	3	2009	23:20:00	-25.98	-39.25	21.1855	999
Alex Baker	Atlantic	24S	I10	17	3	2009	23:43:00	-25.98	-39.18	18	3	2009	22:34:00	-24.13	-37.48	11.5841	999
Alex Baker	Atlantic	24S	I11	21	3	2009	12:10:00	-23.67	-39.12	22	3	2009	12:25:00	-24	-36.23	3.35285	999
Alex Baker	Atlantic	24S	I12	22	3	2009	19:39:00	-24	-35.58	23	3	2009	12:28:00	-24	-34.33	3.89281	999
Alex Baker	Atlantic	24S	I13	23	3	2009	12:54:00	-24	-34.33	24	3	2009	13:09:00	-24	-32.42	1.29745	999
Alex Baker	Atlantic	24S	I14	24	3	2009	13:30:00	-24	-32.42	25	3	2009	15:05:00	-23.98	-30.38	1.90174	999
Alex Baker	Atlantic	24S	I15	25	3	2009	15:20:00	-23.98	-30.38	26	3	2009	11:30:00	-23.98	-29.9	4.11117	999
Alex Baker	Atlantic	24S	I16	26	3	2009	11:35:00	-23.98	-29.9	26	3	2009	23:45:00	-23.95	-29.98	1.21531	999
Alex Baker	Atlantic	24S	I17	27	3	2009	19:40:00	-23.98	-29.65	28	3	2009	19:25:00	-23.98	-27.07	1.50077	999
Alex Baker	Atlantic	24S	I18	28	3	2009	19:30:00	-23.9968	-25.7883	29	3	2009	21:20:00	-23.98	-25.6	1.64177	999
Alex Baker	Atlantic	24S	I19	29	3	2009	21:36:00	-23.98	-25.6	30	3	2009	22:50:00	-23.98	-23.43	2.33404	999
Alex Baker	Atlantic	24S	I20	30	3	2009	23:05:00	-23.98	-23.43	1	4	2009	00:00:00	-24	-21.3	3.3031	999
Alex Baker	Atlantic	24S	I22	1	4	2009	18:44:00	-24	-21.3	2	4	2009	06:35:00	-24	-20.57	5.36729	999
Alex Baker	Atlantic	24S	I23	3	4	2009	21:45:00	-23.4	-17	4	4	2009	14:20:00	-23.2	-15.57	8.38428	999
Alex Baker	Atlantic	24S	I24	5	4	2009	11:57:00	-22.92	-13.85	6	4	2009	12:15:00	-22.25	-12.27	8.51488	999
Alex Baker	Atlantic	24S	I25	6	4	2009	12:30:00	-22.5012	-10.2852	7	4	2009	14:10:00	-22.5	-10.28	7.63134	999
Alex Baker	Atlantic	24S	I26	7	4	2009	14:15:00	-22.5	-10.28	8	4	2009	14:14:00	-23.38	-8.13	3.15059	999
Alex Baker	Atlantic	24S	I27	8	4	2009	14:30:00	-23.38	-8.13	9	4	2009	14:07:00	-23.98	-6.18	3.50127	999
Alex Baker	Atlantic	24S	I28	9	4	2009	14:24:00	-23.98	-6.13	10	4	2009	13:00:00	-23.98	-4.18	4.75573	999
Alex Baker	Atlantic	24S	I29	10	4	2009	13:18:00	-23.98	-4.18	11	4	2009	12:45:00	-23.98	-2.15	5.38109	999
Alex Baker	Atlantic	24S	I30	11	4	2009	13:05:00	-24	-2.1	12	4	2009	13:51:00	-23.98	0.23	8.09484	999
Alex Baker	Atlantic	24S	I31	12	4	2009	14:10:00	-23.98	0.23	13	4	2009	10:58:00	-23.98	2.02	9.28273	999
Alex Baker	Atlantic	24S	I32	13	4	2009	11:08:00	-23.98	2.02	14	4	2009	13:15:00	-24	4.13	7.5756	999
Alex Baker	Atlantic	24S	I33	14	4	2009	13:32:00	-24	4.17	15	4	2009	14:14:00	-23.98	6.23	6.95772	999
Alex Baker	Atlantic	24S	I34	15	4	2009	14:40:00	-23.98	6.32	16	4	2009	11:10:00	-24	7.63	7.30589	999
Alex Baker	Atlantic	24S	I35	16	4	2009	11:28:00	-23.98	7.68	17	4	2009	15:34:00	-23.98	10.22	2.86271	999
Alex Baker	Atlantic	24S	I36	17	4	2009	16:00:00	-23.98	10.27	18	4	2009	10:31:00	-24	12.03	14.3612	999
Alex Baker	Atlantic	24S	I37	18	4	2009	10:50:00	-24	12.05	19	4	2009	11:56:00	-23.87	13.65	12.7904	999
Alex Baker	Atlantic	24S	I38	19	4	2009	12:31:00	-23.95	13.63	20	4	2009	20:00:00	-23.53	13.88	20.6628	999
Alex Baker	Atlantic	ICON	tm02	19	4	2009		21.272	-19.101					21.194	-18.259	19.1729	999
Alex Baker	Atlantic	ICON	tm03	20	4	2009		21.207	-18.141					21.5	-17.242	30.7311	999
Alex Baker	Atlantic	ICON	tm04	21	4	2009		21.5	-17.242					21.243	-17.311	31.9767	999
Alex Baker	Atlantic	ICON	tm05	22	4	2009		21.243	-17.312					21.11	-17.407	21.6561	999
Alex Baker	Atlantic	ICON	tm06	23	4	2009		21.244	-17.314					20.926	-17.521	45.4439	999
Alex Baker	Atlantic	ICON	tm07	24	4	2009		20.926	-17.53					20.8	-17.722	28.8175	999
Alex Baker	Atlantic	ICON	tm08	25	4	2009		20.801	-17.723					20.689	-17.87	65.7085	999
Alex Baker	Atlantic	ICON	tm09	26	4	2009		20.689	-17.87					20.601	-17.979	40.8399	999
Alex Baker	Atlantic	ICON	tm11	29	4	2009		20.601	-17.979					20.969	-18.48	39.7681	999
Alex Baker	Atlantic	ICON	tm15	7	5	2009		21.463	-17.715					21.516	-17.989	93.3561	999
Alex Baker	Atlantic	ICON	tm16	8	5	2009		21.516	-17.988					21.571	-18.045	45.3162	999
Alex Baker	Atlantic	ICON	tm17	9	5	2009		21.567	-18.045					21.557	-18.065	65.9	999
Alex Baker	Atlantic	ICON	tm18	10	5	2009		21.566	-18.067					20.562	-18.589	45.2359	999
Alex Baker	Atlantic	ICON	tm20	13	5	2009		19.672	-18.446					19.885	-18.27	15.6431	999
Alex Baker	Atlantic	ICON	tm21	14	5	2009		19.83	-18.245					19.443	-17.964	14.0689	999
Alex Baker	Atlantic	ICON	tm22	15	5	2009		19.426	-17.964					19.572	-18.201	16.9363	999
Alex Baker	Atlantic	ICON	tm24	17	5	2009		19.627	-18.38					19.641	-18.719	20.5297	999
Alex Baker	Atlantic	ICON	tm25	19	5	2009		19.637	-18.718					19.684	-18.88	49.7325	999
Alex Baker	Atlantic	ICON	tm28	22	5	2009		19.172	-18.808					18.864	-18.777	25.232	999
Alex Baker	Atlantic	ICON	tm29	23	5	2009		18.864	-18.777					21.548	-18.051	35.5259	999
Alex Baker	Atlantic	ICON	tm30	24	5	2009		21.596	-18.039					24.629	-17.297	25.3668	999
Alex Baker	Atlantic	ICON	tm31	25	5	2009		24.633	-17.296					27.65	-16.532	21.8149	999
Alex Baker	Atlantic	NAI09	TM01	11	6	2009		62.61	-19.67							3.48405	999
Alex Baker	Atlantic	NAI09	TM02	13	6	2009		58.98	-20.24							9.1426	999
Alex Baker	Atlantic	NAI09	TM03	17	6	2009		57.48	-11.53							7.28444	999
Alex Baker	Atlantic	NAI09	TM04	21	6	2009		56.84	-8.34							7.57456	999
Alex Baker	Atlantic	AMT19	I04	16	10	2009	16:30:00	48.9328	-16.7282	17	10	2009	15:40:00	46.184	-18.9213	52.2588	35.339
Alex Baker	Atlantic	AMT19	I05	17	10	2009	16:10:00	46.0755	-18.9998	18	10	2009	13:41:00	43.2142	-21.175	47.1782	50.3683
Alex Baker	Atlantic	AMT19	I06	18	10	2009	15:59:00	43.155	-21.215	19	10	2009	13:30:00	40.3232	-23.2718	20.3393	14.3773
Alex Baker	Atlantic	AMT19	I07	19	10	2009	16:18:00	40.1037	-23.422	20	10	2009	13:57:00	37.7255	-25.6473	2.81	3.85461
Alex Baker	Atlantic	AMT19	I08	20	10	2009	17:35:00	37.6982	-25.6502	21	10	2009	15:00:00	37.1012	-26.4885	5.71927	15.1299
Alex Baker	Atlantic	AMT19	I09	21	10	2009	15:57:00	37.0107	-26.6073	22	10	2009	15:40:00	34.64	-29.6978	5.36961	5.01222
Alex Baker	Atlantic	AMT19	I10	22	10	2009	16:15:00	34.5062	-29.835	23	10	2009	16:55:00	32.726	-32.1235	7.47596	3.60554
Alex Baker	Atlantic	AMT19	I11	23	10	2009	18:00:00	32.6127	-32.2677	24	10	2009	14:58:00	30.745	-34.484	5.78497	5.60429
Alex Baker	Atlantic	AMT19	I12	24	10	2009	16:00:00	30.745	-34.484	25	10	2009	14:18:00	28.4787	-36.679	4.0376	3.68388
Alex Baker	Atlantic	AMT19	I13	25	10	2009	16:17:00	28.4275	-36.7222	26	10	2009	14:34:00	27.0228	-38.0532	5.48939	6.65185
Alex Baker	Atlantic	AMT19	I14	26	10	2009	16:00:00	26.925	-38.1592	27	10	2009	14:00:00	24.6518	-40.2832	6.05788	3.60054
Alex Baker	Atlantic	AMT19	I15	27	10	2009	16:30:00	24.5752	-40.3525	28	10	2009	14:15:00	22.5992	-40.277	5.99466	15.4219
Alex Baker	Atlantic	AMT19	I16	28	10	2009	16:20:00	22.508	-40.2107	29	10	2009	14:30:00	21.1198	-39.2685	4.0326	12.7297
Alex Baker	Atlantic	AMT19	I17	30	10	2009	15:50:00	20.9068	-39.1347	31	10	2009	15:14:00	18.4167	-37.35	6.74425	11.2777
Alex Baker	Atlantic	AMT19	I18	31	10	2009	17:34:00	18.1727	-37.192	1	11	2009	17:52:00	15.5833	-35.4333	18.9575	14.7158
Alex Baker	Atlantic	AMT19	I19	1	11	2009	19:29:00	15.3833	-35.2917	2	11	2009	16:16:00	13.2167	-33.8167	17.5222	17.6946
Alex Baker	Atlantic	AMT19	I20	2	11	2009	17:48:00	13.025	-33.6918	3	11	2009	17:33:00	10.3167	-31.8833	19.7913	16.1775
Alex Baker	Atlantic	AMT19	I21	3	11	2009	19:49:00	10.0237	-31.6737	4	11	2009	17:50:00	8.43333	-30.6167	3.83273	3.74525
Alex Baker	Atlantic	AMT19	I22	4	11	2009	18:35:00	8.265	-30.5052	6	11	2009	17:27:00	2.8965	-26.9243	4.18735	5.81415
Alex Baker	Atlantic	AMT19	I23	6	11	2009	18:38:00	2.73167	-26.8105	8	11	2009	14:55:00	-2.87733	-25.0042	5.47875	8.44387
Alex Baker	Atlantic	AMT19	I24	9	11	2009	08:38:00	-4.07317	-25.001	10	11	2009	09:38:00	-7.72583	-24.9977	9.23431	9.27171
Alex Baker	Atlantic	AMT19	I25	10	11	2009	10:37:00	-7.8995	-24.9972	11	11	2009	09:01:00	-11.0667	-25	7.2771	9.87103
Alex Baker	Atlantic	AMT19	I26	12	11	2009	06:24:00	-13.8143	-24.9857	13	11	2009	13:12:00	-14.0232	-25.1798	3.43332	4.81344
Alex Baker	Atlantic	AMT19	I27	15	11	2009	08:12:00	-19.8193	-24.999	16	11	2009	14:20:00	-23.8193	-25.001	4.72212	6.2558
Alex Baker	Atlantic	AMT19	I28	16	11	2009	19:30:00	-24.7293	-24.9957	18	11	2009	06:21:00	-28.7903	-26.1355	3.52851	5.1177
Alex Baker	Atlantic	AMT19	I29	18	11	2009	10:15:00	-29.1267	-26.6478	19	11	2009	06:54:00	-30.9013	-29.2917	2.7032	6.69992
Alex Baker	Atlantic	AMT19	I30	19	11	2009	15:27:00	-31.5975	-30.3302	21	11	2009	07:35:00	-33.438	-34.266	3.51453	3.41794
Alex Baker	Atlantic	AMT19	I31	21	11	2009	10:42:00	-33.7083	-34.71	22	11	2009	11:42:00	-35.258	-37.1687	1.16205	7.423
Alex Baker	Atlantic	NAI10a	TM02	28	4	2010	11:25:00	57.602	-16.817	29	4	2010	18:40:00	59.1759	-25.0221	2.35327	3.40173
Alex Baker	Atlantic	NAI10a	TM03	29	4	2010	22:45:00	59.4017	-26.2435	1	5	2010	22:41:00	60.003	-35.005	4.93159	6.46684
Alex Baker	Atlantic	NAI10a	TM04	2	5	2010	15:04:00	60.012	-34.355	5	5	2010	05:52:00	59.94	-26.158	9.67396	14.4843
Alex Baker	Atlantic	NAI10a	TM05	5	5	2010	14:51:00	60.008	-25.7	7	5	2010	12:00:00	61.937	-20.05	4.96376	13.962
Alex Baker	Atlantic	NAI10a	TM06	7	5	2010	13:04:00	61.925	-20.057	8	5	2010	11:15:00	63.073	-19.878	6.52455	11.2294
Alex Baker	Atlantic	NAI10a	TM07	8	5	2010	16:26:00	63.105	-18.525	8	5	2010	18:25:00	63.093	-18.977	24.6569	39.811
Alex Baker	Atlantic	NAI10a	TM08	8	5	2010	19:03:00	63.088	-18.982	8	5	2010	22:20:00	63.092	-19.173	10.0484	29.64
Alex Baker	Atlantic	NAI10a	TM09	9	5	2010	00:58:00	63.122	-19.908	9	5	2010	02:03:00	63.65	-22.712	51.5162	104.107
Alex Baker	Atlantic	ANT26-4	MI03	13	4	2010	17:57:00	-39.0079	-50.7951	14	4	2010	15:10:00	-36.9214	-47.7224	9.61731	1.38157
Alex Baker	Atlantic	ANT26-4	MI04	14	4	2010	17:11:00	-36.8867	-47.672	15	4	2010	15:16:00	-34.7156	-44.44	3.16281	0.903523
Alex Baker	Atlantic	ANT26-4	MI05	15	4	2010	17:17:00	-34.6931	-44.7268	16	4	2010	15:17:00	-32.4732	-41.159	8.92472	0.667954
Alex Baker	Atlantic	ANT26-4	MI06	16	4	2010	17:21:00	-32.4191	-41.081	17	4	2010	14:50:00	-31.2058	-39.3598	3.2527	0.962772
Alex Baker	Atlantic	ANT26-4	MI07	17	4	2010	16:57:00	-31.079	-39.2635	18	4	2010	15:15:00	-27.7896	-37.389	3.96749	2.24629
Alex Baker	Atlantic	ANT26-4	MI08	18	4	2010	17:30:00	-27.6995	-37.3381	19	4	2010	14:12:00	-24.7542	-35.7121	3.49776	1.11389
Alex Baker	Atlantic	ANT26-4	MI09	19	4	2010	16:32:00	-24.7042	-35.6816	20	4	2010	14:16:00	-21.7812	-34.103	6.69939	0.971876
Alex Baker	Atlantic	ANT26-4	MI10	20	4	2010	16:37:00	-21.7299	-34.0755	21	4	2010	13:52:00	-18.8158	-32.5343	6.15218	1.47005
Alex Baker	Atlantic	ANT26-4	MI11	21	4	2010	16:18:00	-18.7261	-32.4825	22	4	2010	14:08:00	-15.9333	-30.5088	7.25863	0.996328
Alex Baker	Atlantic	ANT26-4	MI12	22	4	2010	16:26:00	-15.821	-30.4307	23	4	2010	14:03:00	-13.0692	-28.5141	3.27418	2.12833
Alex Baker	Atlantic	ANT26-4	MI13	23	4	2010	16:22:00	-13.02	-28.48	24	4	2010	09:15:00	-10.78	-26.9362	2.96141	1.23617
Alex Baker	Atlantic	ANT26-4	MI14	24	4	2010	16:48:00	-10.7	-26.9	25	4	2010	14:11:00	-7.9975	-25.0342	6.63435	0.644849
Alex Baker	Atlantic	ANT26-4	MI15	25	4	2010	16:45:00	-7.9	-25	26	4	2010	13:52:00	-5.19367	-23.1306	2.869	0.747747
Alex Baker	Atlantic	ANT26-4	MI16	26	4	2010	16:23:00	-5.13753	-23.0928	27	4	2010	13:00:00	-1.77653	-22.9997	2.34906	1.02719
Alex Baker	Atlantic	ANT26-4	MI17	27	4	2010	15:05:00	-1.66458	-22.9998	28	4	2010	11:58:00	1.74667	-22.9997	3.99091	1.7716
Alex Baker	Atlantic	ANT26-4	MI18	28	4	2010	14:58:00	1.81103	-22.9997	29	4	2010	12:15:00	5.07478	-22.9998	4.87754	2.37006
Alex Baker	Atlantic	ANT26-4	MI19	29	4	2010	15:39:00	5.10917	-22.9997	30	4	2010	13:00:00	8.04097	-22.9998	4.4721	12.8584
Alex Baker	Atlantic	ANT26-4	MI20	30	4	2010	15:16:00	8.1717	-22.9997	1	5	2010	09:00:00	11.125	-22.9997	12.8035	12.0173
Alex Baker	Atlantic	ANT26-4	MI21	1	5	2010	17:05:00	12.1051	-22.9998	2	5	2010	09:08:00	14.5514	-23.6835	31.4478	7.33597
Alex Baker	Atlantic	ANT26-4	MI22	2	5	2010	15:59:00	14.6084	-23.7205	3	5	2010	08:13:00	16.9065	-25.089	31.424	5.25725
Alex Baker	Atlantic	ANT26-4	MI23	3	5	2010	17:39:00	16.9419	-25.0267	4	5	2010	00:00:00	17.5832	-24.2509	55.5765	6.55303
Alex Baker	Atlantic	ANT26-4	MI24	4	5	2010	17:23:00	17.6657	-24.8059	5	5	2010	12:02:00	20.2015	-22.8938	13.6647	5.74016
Alex Baker	Atlantic	ANT26-4	MI25	5	5	2010	14:19:00	20.3387	-22.7894	6	5	2010	11:10:00	23.0934	-20.6745	4.20515	5.10987
Alex Baker	Atlantic	ANT26-4	MI26	6	5	2010	13:25:00	23.1736	-20.6124	7	5	2010	11:12:00	26.0498	-17.5241	12.2103	9.03668
Alex Baker	Atlantic	ANT26-4	MI28	8	5	2010	11:48:00	28.3594	-15.3147	9	5	2010	10:19:00	33.4755	-13.8919	8.78744	13.6319
Alex Baker	Atlantic	ANT26-4	MI29	9	5	2010	13:56:00	33.6443	-13.8437	10	5	2010	11:37:00	36.532	-13.0221	18.1071	5.95173
Alex Baker	Atlantic	ANT26-4	MI30	10	5	2010	19:29:00	36.6393	-12.9652	11	5	2010	11:50:00	39.7625	-11.8466	41.3845	22.3039
Alex Baker	Atlantic	ANT26-4	MI31	11	5	2010	13:50:00	39.8213	-11.8234	12	5	2010	11:54:00	43.3832	-10.4531	13.5597	45.1228
Alex Baker	Atlantic	ANT26-4	MI33	12	5	2010	14:12:00	43.522	-10.3338	13	5	2010	12:21:00	46.0079	-8.15618	14.5337	36.7805
Alex Baker	Atlantic	ANT26-4	MI34	13	5	2010	12:47:00	46.0095	-8.15742	14	5	2010	10:23:00	48.8601	-6.3609	42.5766	21.0496
Alex Baker	Atlantic	ANT26-4	MI35	14	5	2010	18:21:00	49.3191	-4.76398	15	5	2010	10:13:00	50.2767	-0.362867	50.4286	43.9545
Alex Baker	Atlantic	P399	TM01	5	6	2010		16.9583	-24.88					17.6567	-21.5933	28.083	999
Alex Baker	Atlantic	P399	TM02	6	6	2010		17.67	-21.57					18.0033	-20.9983	21.974	999
Alex Baker	Atlantic	P399	TM03	7	6	2010		18.0017	-21					17.9998	-18.9083	28.1028	999
Alex Baker	Atlantic	P399	TM04	8	6	2010		18	-18.8833					18	-18	54.6807	999
Alex Baker	Atlantic	P399	TM05	9	6	2010		18	-18					18.5017	-16.4983	42.2408	999
Alex Baker	Atlantic	P399	TM06	10	6	2010		18.5	-16.5					18.5667	-16.5	43.2888	999
Alex Baker	Atlantic	P399	TM07	11	6	2010		18.6017	-16.5					19.0017	-16.57	17.8474	999
Alex Baker	Atlantic	P399	TM08	12	6	2010		19	-16.57							20.2265	999
Alex Baker	Atlantic	P399	TM09	13	6	2010		20	-17.25					20.3783	-17.9617	27.7494	999
Alex Baker	Atlantic	P399	TM10	14	6	2010		20.4017	-17.96					23.6117	-17.6517	25.1059	999
Alex Baker	Atlantic	P399	TM11	15	6	2010		23.635	-17.6483					26.4933	-16.72	32.9437	999
Alex Baker	Atlantic	P399	TM12	16	6	2010		26.5083	-16.7083					27.69	-15.8067	17.8492	999
Alex Baker	Atlantic	P399	TM13	19	6	2010		29.1667	-15.5					31.0467	-13.705	33.7939	999
Alex Baker	Atlantic	P399	TM14	20	6	2010		31.0717	-13.69					33.6717	-12.2783	28.558	999
Alex Baker	Atlantic	P399	TM15	21	6	2010		33.6917	-12.2683					36.515	-10.8683	35.5953	999
Alex Baker	Atlantic	P399	TM16	22	6	2010		36.5383	-10.8567					39.4867	-9.71667	69.8267	999
Alex Baker	Atlantic	NAI10	TM07	17	7	2010		60	-34.9833							3.89393	9.28957
Alex Baker	Atlantic	NAI10	TM08	19	7	2010		60	-42.2							6.10329	13.7196
Alex Baker	Atlantic	NAI10	TM09	23	7	2010		62.9833	-32.6167							1.88297	7.66774
Alex Baker	Atlantic	NAI10	TM10	26	7	2010		58.2167	-35.0833							2.65507	5.8598
Alex Baker	Atlantic	NAI10	TM11	29	7	2010		63.8167	-35							1.55461	7.88266
Alex Baker	Atlantic	NAI10	TM12	4	8	2010		61.35	-21.85							2.82333	6.89706
Alex Baker	Atlantic	AMT20	M04	15	10	2010	11:23:00	48.35	-17.1167	16	10	2010	10:07:00	45.5333	-19.6	31.6502	41.4531
Alex Baker	Atlantic	AMT20	M05	16	10	2010	14:06:00	45.2	-19.9167	17	10	2010	10:12:00	43.1	-21.7333	130.074	228.56
Alex Baker	Atlantic	AMT20	M06	17	10	2010	11:12:00	42.9833	-21.85	18	10	2010	12:05:00	40.2167	-24.1	12.8619	34.8042
Alex Baker	Atlantic	AMT20	M07	18	10	2010	12:42:00	40.15	-24.1667	19	10	2010	10:25:00	37.8333	-25.9167	11.2412	39.0346
Alex Baker	Atlantic	AMT20	M08	21	10	2010	10:54:00	34.0167	-29.9833	22	10	2010	10:54:00	32.0667	-32.1833	11.768	44.3324
Alex Baker	Atlantic	AMT20	M09	22	10	2010	11:17:00	32.0333	-32.3167	23	10	2010	11:06:00	29.9167	-34.5667	10.7641	31.6687
Alex Baker	Atlantic	AMT20	M10	23	10	2010	11:31:00	29.8667	-34.6167	24	10	2010	11:05:00	27.75	-36.9	14.3132	42.7296
Alex Baker	Atlantic	AMT20	M11	24	10	2010	11:38:00	27.7	-36.9667	25	10	2010	10:50:00	25.6167	-39.1667	11.3054	35.7414
Alex Baker	Atlantic	AMT20	M12	25	10	2010	11:27:00	25.55	-39.2333	26	10	2010	11:00:00	23.3333	-40.7833	9.92123	16.131
Alex Baker	Atlantic	AMT20	M13	26	10	2010	13:50:00	22.95	-40.5167	27	10	2010	10:53:00	20.8167	-39.0167	7.13241	12.0173
Alex Baker	Atlantic	AMT20	M16	29	10	2010	11:46:00	15.6833	-35.4667	30	10	2010	11:06:00	12.9667	-33.6167	21.5974	35.3485
Alex Baker	Atlantic	AMT20	M17	30	10	2010	11:25:00	12.9167	-33.5833	31	10	2010	11:02:00	10.1833	-31.75	28.466	31.3439
Alex Baker	Atlantic	AMT20	M18	31	10	2010	11:21:00	10.1333	-31.7167	1	11	2010	11:02:00	7.26667	-29.7833	7.36569	10.9815
Alex Baker	Atlantic	AMT20	M19	1	11	2010	11:26:00	7.2	-29.75	2	11	2010	10:00:00	4.33333	-27.8667	6.38931	10.3722
Alex Baker	Atlantic	AMT20	M20	2	11	2010	10:24:00	4.26667	-27.8167	3	11	2010	10:00:00	1.41667	-25.9333	17.3453	18.6303
Alex Baker	Atlantic	AMT20	M21	3	11	2010	10:25:00	1.35	-25.8833	4	11	2010	10:05:00	-1.31667	-25	11.1494	11.6822
Alex Baker	Atlantic	AMT20	M22	4	11	2010	10:28:00	-1.31667	-24.9833	5	11	2010	10:30:00	-4.43333	-25.0167	6.74403	8.02213
Alex Baker	Atlantic	AMT20	M23	5	11	2010	10:53:00	-4.5	-25.0167	6	11	2010	09:56:00	-6.15	-23.2167	7.53153	10.8383
Alex Baker	Atlantic	AMT20	M24	6	11	2010	10:22:00	-6.16667	-23.15	7	11	2010	10:05:00	-6.91667	-19.3167	9.29925	12.5174
Alex Baker	Atlantic	AMT20	M25	7	11	2010	10:30:00	-6.93333	-19.2667	7	11	2010	19:47:00	-7.25	-17.6667	9.40069	27.392
Alex Baker	Atlantic	AMT20	M26	9	11	2010	10:12:00	-10.35	-16.85	10	11	2010	10:13:00	-13.1	-19.5833	15.1528	24.3679
Alex Baker	Atlantic	AMT20	M27	10	11	2010	10:33:00	-13.15	-19.6333	11	11	2010	10:08:00	-15.9167	-22.4333	15.1617	31.4897
Alex Baker	Atlantic	AMT20	M28	11	11	2010	10:28:00	-15.9667	-22.3833	12	11	2010	10:20:00	-18.5167	-25.1	11.3581	32.9654
Alex Baker	Atlantic	AMT20	M29	12	11	2010	10:42:00	-18.5333	-25.1167	13	11	2010	10:03:00	-21.1833	-25.1	9.51715	20.0345
Alex Baker	Atlantic	AMT20	M30	13	11	2010	10:30:00	-21.2667	-25.1	14	11	2010	09:58:00	-24.3833	-27	4.62647	12.4636
Alex Baker	Atlantic	AMT20	M31	14	11	2010	10:29:00	-24.4667	-27.0667	15	11	2010	10:00:00	-27.4667	-29.6	2.19711	13.9838
Alex Baker	Atlantic	AMT20	M32	15	11	2010	10:19:00	-27.5167	-29.6333	16	11	2010	11:06:00	-30.5667	-32.4333	3.59146	11.7275
Alex Baker	Atlantic	AMT20	M33	16	11	2010	11:31:00	-30.6167	-32.4667	18	11	2010	11:05:00	-36.6667	-38.75	6.26753	32.5495
Alex Baker	Atlantic	AMT20	M34	18	11	2010	11:30:00	-36.7333	-38.8167	20	11	2010	12:03:00	-42.15	-45.7833	6.29652	29.7583
Alex Baker	Atlantic	D361	MI_05	21	2	2011	21:24:00	13.1277	-17.9742	22	2	2011	18:12:00	12.599	-17.5698	68.3742	15.0958
Alex Baker	Atlantic	D361	MI_06	22	2	2011	18:57:00	12.6058	-17.5713	23	2	2011	11:38:00	12.5457	-18.8395	55.1224	10.2923
Alex Baker	Atlantic	D361	MI_07	23	2	2011	13:10:00	12.546	-18.8662	24	2	2011	13:29:00	12.5743	-21.8183	11.7009	5.41014
Alex Baker	Atlantic	D361	MI_08	24	2	2011	14:49:00	12.5738	-21.8168	25	2	2011	09:44:00	12.5852	-23.5627	43.2354	6.44482
Alex Baker	Atlantic	D361	MI_09	25	2	2011	10:59:00	12.5872	-23.563	25	2	2011	20:57:00	12.5693	-23.7648	31.1092	10.3066
Alex Baker	Atlantic	D361	MI_10	25	2	2011	22:00:00	12.536	-23.9198	26	2	2011	09:58:00	12.3012	-25.1533	29.6186	10.5087
Alex Baker	Atlantic	D361	MI_11	26	2	2011	12:26:00	12.302	-25.1695	27	2	2011	10:28:00	9.4575	-25.658	24.7281	14.7173
Alex Baker	Atlantic	D361	MI_12	27	2	2011	14:59:00	8.66867	-25.6247	28	2	2011	11:18:00	5.02033	-25.4818	33.663	16.6358
Alex Baker	Atlantic	D361	MI_13	28	2	2011	12:26:00	4.81517	-25.476	1	3	2011	10:17:00	1.02483	-25.327	999	999
Alex Baker	Atlantic	D361	MI_14	1	3	2011	11:41:00	0.7965	-25.3137	2	3	2011	14:42:00	-3.559	-25.151	4.34969	4.34535
Alex Baker	Atlantic	D361	MI_15	2	3	2011	15:56:00	-3.7405	-25.1387	3	3	2011	13:15:00	-7.0005	-25.0005	7.44701	3.60727
Alex Baker	Atlantic	D361	MI_16	3	3	2011	14:17:00	-7.1545	-24.9937	4	3	2011	13:18:00	-5.95533	-25.1212	999	999
Alex Baker	Atlantic	D361	MI_17	4	3	2011	14:13:00	-5.798	-25.141	5	3	2011	11:10:00	-3.24683	-25.5385	7.23435	6.68963
Alex Baker	Atlantic	D361	MI_19	5	3	2011	16:09:00	-2.99683	-25.5977	6	3	2011	17:13:00	-0.868333	-25.813	999	999
Alex Baker	Atlantic	D361	MI_20	6	3	2011	17:53:00	0.762	-25.8208	7	3	2011	19:15:00	1.68267	-26.2487	9.14306	6.26908
Alex Baker	Atlantic	D361	MI_21	7	3	2011	20:05:00	1.80967	-26.291	8	3	2011	19:19:00	4.15617	-27.0667	15.2851	10.4881
Alex Baker	Atlantic	D361	MI_22	8	3	2011	20:26:00	4.32167	-27.1135	9	3	2011	19:24:00	6.739	-27.8042	30.183	21.4292
Alex Baker	Atlantic	D361	MI_23	9	3	2011	20:05:00	6.8435	-27.839	10	3	2011	19:24:00	8.92633	-28.4283	18.4932	11.4065
Alex Baker	Atlantic	D361	MI_24	10	3	2011	20:00:00	9.0245	-28.4453	11	3	2011	19:18:00	11.3135	-28.8637	15.1573	11.2346
Alex Baker	Atlantic	D361	MI_25	11	3	2011	20:07:00	11.4465	-28.8907	13	3	2011	10:45:00	15.504	-28.7975	2.54207	1.1487
Alex Baker	Atlantic	D361	MI_26	13	3	2011	11:56:00	15.5055	-28.8012	14	3	2011	11:05:00	17.4232	-28.3778	3.20521	2.05019
Alex Baker	Atlantic	D361	MI_27	14	3	2011	12:00:00	17.4232	-28.3778	15	3	2011	11:09:00	19.1753	-28.1175	999	999
Alex Baker	Atlantic	D361	MI_28	15	3	2011	12:11:00	19.1843	-28.126	16	3	2011	12:54:00	21.194	-25.5548	3.08927	2.32912
Alex Baker	Atlantic	D361	MI_29	16	3	2011	13:46:00	21.2695	-25.4538	17	3	2011	12:48:00	23.4047	-22.6567	3.76488	1.71295
Alex Baker	Atlantic	AMT21	I04	1	10	2011		49.1232	-14.8073							3.7111	999
Alex Baker	Atlantic	AMT21	I05	2	10	2011		46.6887	-18.0672							11.1453	999
Alex Baker	Atlantic	AMT21	I06	3	10	2011		43.6818	-19.9968							7.18183	999
Alex Baker	Atlantic	AMT21	I07	4	10	2011		40.4472	-21.9912							10.9286	999
Alex Baker	Atlantic	AMT21	I08	5	10	2011		37.262	-23.8427							7.71868	999
Alex Baker	Atlantic	AMT21	I09	6	10	2011		34.8937	-26.8628							7.14793	999
Alex Baker	Atlantic	AMT21	I10	7	10	2011		32.8007	-29.635							15.0417	999
Alex Baker	Atlantic	AMT21	I11	8	10	2011		30.8895	-32.1842							16.5742	999
Alex Baker	Atlantic	AMT21	I12	9	10	2011		28.8388	-34.8055							17.2197	999
Alex Baker	Atlantic	AMT21	I13	10	10	2011		26.9202	-37.2093							5.25095	999
Alex Baker	Atlantic	AMT21	I14	11	10	2011		24.9233	-39.6865							6.12976	999
Alex Baker	Atlantic	AMT21	I15	12	10	2011		22.6507	-40.2475							8.68765	999
Alex Baker	Atlantic	AMT21	I16	13	10	2011		20.391	-38.5415							16.7806	999
Alex Baker	Atlantic	AMT21	I17	14	10	2011		18.0217	-36.8367							20.3966	999
Alex Baker	Atlantic	AMT21	I18	15	10	2011		15.6627	-35.1827							17.075	999
Alex Baker	Atlantic	AMT21	I19	16	10	2011		12.7545	-33.2007							6.70289	999
Alex Baker	Atlantic	AMT21	I20	17	10	2011		9.64617	-31.1407							4.22412	999
Alex Baker	Atlantic	AMT21	I21	18	10	2011		6.52067	-29.1282							8.6664	999
Alex Baker	Atlantic	AMT21	I22	19	10	2011		3.6875	-27.2953							4.82563	999
Alex Baker	Atlantic	AMT21	I23	20	10	2011		1.03317	-25.6493							9.34658	999
Alex Baker	Atlantic	AMT21	I24	21	10	2011		-1.9425	-25.0102							12.3949	999
Alex Baker	Atlantic	AMT21	I25	22	10	2011		-5.60617	-25.0245							11.5596	999
Alex Baker	Atlantic	AMT21	I26	23	10	2011		-8.70367	-25.0558							8.02223	999
Alex Baker	Atlantic	AMT21	I27	24	10	2011		-11.6538	-25.0605							1.17337	999
Alex Baker	Atlantic	AMT21	I28	25	10	2011		-14.1723	-25.0747							2.02241	999
Alex Baker	Atlantic	AMT21	I29	26	10	2011		-16.9472	-25.0823							1.41503	999
Alex Baker	Atlantic	AMT21	I30	27	10	2011		-18.5318	-25.0767							2.06305	999
Alex Baker	Atlantic	AMT21	I31	28	10	2011		-21.0838	-25.0773							1.789	999
Alex Baker	Atlantic	AMT21	I32	30	10	2011		-27.1567	-25.0118							1.56396	999
Alex Baker	Atlantic	AMT21	I33	1	11	2011		-31.442	-29.6888							1.2121	999
Alex Baker	Atlantic	AMT21	I34	3	11	2011		-35.5258	-35.5142							2.87215	999
Alex Baker	Atlantic	AMT21	I35	5	11	2011		-39.0885	-40.7782							1.39835	999
Alex Baker	Atlantic	AMT21	I36	7	11	2011		-43.1092	-47.1798							3.1672	999
Fudan University	Mediterranean	M/V Oceanic II,http://en.wikipedia.org/wiki/The_Scholar_Ship	V2(42)	21	3	2008	06:43:00	41.367	2.183	21	3	2008	18:38:00	41.367	2.183	24.3168	6.61198
Fudan University	Mediterranean	M/V Oceanic II,http://en.wikipedia.org/wiki/The_Scholar_Ship	V2(41)	21	3	2008	18:46:00	41.367	2.183	22	3	2008	06:40:00	41.367	2.183	44.0597	999
Fudan University	Mediterranean	M/V Oceanic II,http://en.wikipedia.org/wiki/The_Scholar_Ship	V2(40)	27	3	2008	15:48:00	41.367	2.183	28	3	2008	15:34:00	41.833	5.167	69.6737	35.9806
Fudan University	Mediterranean	M/V Oceanic II,http://en.wikipedia.org/wiki/The_Scholar_Ship	V2(39)	28	3	2008	05:45:00	39.817	5.217	28	3	2008	17:34:00	38.3	8.133	0.331337	999
Fudan University	Mediterranean	M/V Oceanic II,http://en.wikipedia.org/wiki/The_Scholar_Ship	V2(38)	28	3	2008	17:40:00	38.283	8.167	29	3	2008	05:36:00	37.383	11.7	3.12878	999
Fudan University	Mediterranean	M/V Oceanic II,http://en.wikipedia.org/wiki/The_Scholar_Ship	V2(37)	29	3	2008	05:45:00	37.367	11.75	29	3	2008	17:39:00	36.55	15.117	0.326621	999
Fudan University	Mediterranean	M/V Oceanic II,http://en.wikipedia.org/wiki/The_Scholar_Ship	V2(36)	29	3	2008	17:40:00	36.55	15.15	30	3	2008	05:34:00	36.467	18.683	3.01028	999
Fudan University	Mediterranean	M/V Oceanic II,http://en.wikipedia.org/wiki/The_Scholar_Ship	V2(25)	30	3	2008	05:43:00	36.467	18.733	30	3	2008	17:37:00	36.35	22.283	7.18419	999
Fudan University	Mediterranean	M/V Oceanic II,http://en.wikipedia.org/wiki/The_Scholar_Ship	V2(26)	30	3	2008	17:43:00	36.35	22.317	31	3	2008	05:37:00	38.017	24.667	0.939016	999
Fudan University	Mediterranean	M/V Oceanic II,http://en.wikipedia.org/wiki/The_Scholar_Ship	V2(27)	31	3	2008	05:45:00	38.05	24.683	31	3	2008	17:37:00	40.2	26.4	40.8951	10.6482
Fudan University	Mediterranean	M/V Oceanic II,http://en.wikipedia.org/wiki/The_Scholar_Ship	V2(28)	31	3	2008	17:43:00	40.217	26.433	1	4	2008	05:33:00	41.017	28.983	11.4654	999
Fudan University	Mediterranean	M/V Oceanic II,http://en.wikipedia.org/wiki/The_Scholar_Ship	V2(35)	1	4	2008	05:41:00	41.017	28.983	2	4	2008	05:32:00	41.017	28.983	76.8197	999
Fudan University	Mediterranean	M/V Oceanic II,http://en.wikipedia.org/wiki/The_Scholar_Ship	V2(24)	8	4	2008	05:32:00	37.833	24.583	9	4	2008	17:41:00	36.4	20.817	17.5644	999
Fudan University	Mediterranean	M/V Oceanic II,http://en.wikipedia.org/wiki/The_Scholar_Ship	V2(34)	9	4	2008	17:47:00	36.4	20.8	10	4	2008	17:36:00	36.567	15.667	26.9743	999
Fudan University	Mediterranean	M/V Oceanic II,http://en.wikipedia.org/wiki/The_Scholar_Ship	V2(33)	10	4	2008	17:42:00	36.567	15.633	11	4	2008	17:36:00	37.6	10.833	23.7386	999
Fudan University	Mediterranean	M/V Oceanic II,http://en.wikipedia.org/wiki/The_Scholar_Ship	V2(32)	11	4	2008	17:43:00	37.6	10.817	12	4	2008	17:43:00	37.533	5.833	7.3754	999
Fudan University	Mediterranean	M/V Oceanic II,http://en.wikipedia.org/wiki/The_Scholar_Ship	V2(31)	12	4	2008	17:48:00	37.533	5.48	13	4	2008	17:41:00	36.6	-1.75	28.1134	999
Fudan University	Mediterranean	M/V Oceanic II,http://en.wikipedia.org/wiki/The_Scholar_Ship	V2(30)	13	4	2008	17:47:00	36.583	-1.183	14	4	2008	17:37:00	36.45	-8	34.7577	999
Joe Prospero	Indian	MB95-02 to MB95-07	IND Ocean	22	3	1995	09:00			22	3	1995	16:00	-32.0667	32	1.17412	1.33839
Joe Prospero	Indian	MB95-02 to MB95-07	IND Ocean	22	3	1995	16:00	-32.0739	32	23	3	1995	08:55	-32	36.1	1.74835	0.948584
Joe Prospero	Indian	MB95-02 to MB95-07	IND Ocean	23	3	1995	09:03	-32.0011	36.1	23	3	1995	15:45	-32.9833	36.65	3.01364	999
Joe Prospero	Indian	MB95-02 to MB95-07	IND Ocean	23	3	1995	15:55	-32.9842	36.65	24	3	1995	06:07	-32.9833	38.9167	1.22299	999
Joe Prospero	Indian	MB95-02 to MB95-07	IND Ocean	24	3	1995	06:11	-32.9853	38.9167	25	3	1995	07:00	-32.9833	42.4833	1.16744	999
Joe Prospero	Indian	MB95-02 to MB95-07	IND Ocean	25	3	1995	07:06	-32.985	42.4833	25	3	1995	15:10	-32.9833	43.7	0.972741	999
Joe Prospero	Indian	MB95-02 to MB95-07	IND Ocean	25	3	1995	15:10	-32.9908	43.7	26	3	1995	05:45	-33.3	46.4167	0.830732	999
Joe Prospero	Indian	MB95-02 to MB95-07	IND Ocean	26	3	1995	05:45	-33.3033	46.4167	26	3	1995	14:20	-33.5	47.8833	1.1888	999
Joe Prospero	Indian	MB95-02 to MB95-07	IND Ocean	26	3	1995	14:20	-33.5011	47.8833	27	3	1995	05:20	-32.9	50.75	1.48192	999
Joe Prospero	Indian	MB95-02 to MB95-07	IND Ocean	27	3	1995	05:20	-32.9119	50.75	27	3	1995	14:50	-31.9	52.0667	1.21661	999
Joe Prospero	Indian	MB95-02 to MB95-07	IND Ocean	27	3	1995	14:50	-31.9019	52.0667	28	3	1995	13:40	-29.4667	54.9833	2.82773	0.586514
Joe Prospero	Indian	MB95-02 to MB95-07	IND Ocean	28	3	1995	13:40	-29.4856	54.9833	29	3	1995	13:20	-27.9667	54.95	1.37927	999
Joe Prospero	Indian	MB95-02 to MB95-07	IND Ocean	29	3	1995	13:20	-27.9686	54.95	30	3	1995	04:00	-26.95	54.9667	1.51201	999
Joe Prospero	Indian	MB95-02 to MB95-07	IND Ocean	30	3	1995	04:00	-26.9578	54.9667	30	3	1995	14:10	-25.9833	54.9667	2.71575	999
Joe Prospero	Indian	MB95-02 to MB95-07	IND Ocean	30	3	1995	14:10	-25.9856	54.9667	31	3	1995	03:40	-24.9833	54.9833	1.1019	999
Joe Prospero	Indian	MB95-02 to MB95-07	IND Ocean	31	3	1995	03:40	-24.9858	54.9833	31	3	1995	14:00	-23.9833	55	1.06969	999
Joe Prospero	Indian	MB95-02 to MB95-07	IND Ocean	31	3	1995	14:00	-23.9978	55	1	4	1995	03:40	-22.8	54.9667	2.68519	0.0843939
Joe Prospero	Indian	MB95-02 to MB95-07	IND Ocean	1	4	1995	03:40	-22.8153	54.9667	1	4	1995	14:30	-21.6167	54.9667	4.94154	2.30659
Joe Prospero	Indian	MB95-02 to MB95-07	IND Ocean	1	4	1995	14:30	-21.6186	54.9667	2	4	1995	04:30	-20	54.9833	11.3987	9.01206
Joe Prospero	Indian	MB95-02 to MB95-07	IND Ocean	2	4	1995	04:30	-20.0022	54.9833	2	4	1995	14:30	-18.9833	55	12.0546	9.97201
Joe Prospero	Indian	MB95-02 to MB95-07	IND Ocean	2	4	1995	14:30	-18.985	55	3	4	1995	14:15	-19.8667	57.0667	11.4308	21.6665
Joe Prospero	Indian	MB95-02 to MB95-07	IND Ocean	3	4	1995	14:15	-19.8686	57.0667	4	4	1995	03:50	-18.4667	54.9667	4.0247	6.6333
Joe Prospero	Indian	MB95-02 to MB95-07	IND Ocean	4	4	1995	03:50	-18.4686	54.9667	4	4	1995	13:20	-17.5333	54.9667	6.13042	7.55798
Joe Prospero	Indian	MB95-02 to MB95-07	IND Ocean	4	4	1995	13:20	-17.5356	54.9667	5	4	1995	03:30	-16.25	54.9833	2.17086	2.96534
Joe Prospero	Indian	MB95-02 to MB95-07	IND Ocean	5	4	1995	03:30	-16.2517	54.9833	5	4	1995	14:15	-15.1833	55	5.10023	5.48944
Joe Prospero	Indian	MB95-02 to MB95-07	IND Ocean	5	4	1995	14:15	-15.185	55	6	4	1995	03:40	-14.15	55	3.27763	3.49369
Joe Prospero	Indian	MB95-02 to MB95-07	IND Ocean	6	4	1995	03:40	-14.1567	55	6	4	1995	14:21	-13.2167	54.9667	2.81702	5.21798
Joe Prospero	Indian	MB95-02 to MB95-07	IND Ocean	6	4	1995	14:21	-13.2175	54.9667	7	4	1995	03:40	-11.95	54.65	2.94842	5.32887
Joe Prospero	Indian	MB95-02 to MB95-07	IND Ocean	7	4	1995	03:40	-11.9517	54.65	7	4	1995	14:10	-11.4	53.9833	2.97551	9.34664
Joe Prospero	Indian	MB95-02 to MB95-07	IND Ocean	7	4	1995	14:10	-11.4011	53.9833	8	4	1995	03:40	-10.7167	53.2	4.30534	2.63261
Joe Prospero	Indian	MB95-02 to MB95-07	IND Ocean	8	4	1995	03:40	-10.7189	53.3667	8	4	1995	14:26	-10.1167	52.4833	2.35094	5.00686
Joe Prospero	Indian	MB95-02 to MB95-07	IND Ocean	8	4	1995	14:30	-10.1247	52.4833	9	4	1995	06:15	-9.61667	51.8833	2.15826	4.03751
Joe Prospero	Indian	MB95-02 to MB95-07	IND Ocean	9	4	1995	06:15	-9.61778	51.8833	9	4	1995	15:45	-9.08333	51.7833	3.42261	6.02612
Joe Prospero	Indian	MB95-02 to MB95-07	IND Ocean	9	4	1995	15:45	-9.09361	51.7833	10	4	1995	03:40	-8.45	52	4.57724	3.65555
Joe Prospero	Indian	MB95-02 to MB95-07	IND Ocean	10	4	1995	03:40	-8.46278	52.0333	11	4	1995	04:40	-7.23333	52.8833	4.32223	2.23904
Joe Prospero	Indian	MB95-02 to MB95-07	IND Ocean	11	4	1995	04:40	-7.24889	52.8833	11	4	1995	19:05	-5.2	53.0833	7.35464	8.52735
Joe Prospero	Indian	MB95-02 to MB95-07	IND Ocean	11	4	1995	19:05	-5.20278	53.0833	12	4	1995	04:20	-3.96667	54.3	23.6003	17.4581
Joe Prospero	Indian	MB95-02 to MB95-07	IND Ocean	12	4	1995	04:20	-3.97333	54.3	12	4	1995	18:10	-2.5	55	16.1537	16.1893
Joe Prospero	Indian	MB95-02 to MB95-07	IND Ocean	12	4	1995	18:10	-2.50583	55	13	4	1995	05:35	-1.18333	55	20.6826	16.5876
Joe Prospero	Indian	MB95-02 to MB95-07	IND Ocean	13	4	1995	05:35	-1.185	55	13	4	1995	19:40	-0.15	55.35	17.8635	14.2679
Joe Prospero	Indian	MB95-02 to MB95-07	IND Ocean	13	4	1995	19:40	-0.1625	55.35	14	4	1995	06:30	0.916667	56.3333	15.6263	14.0062
Joe Prospero	Indian	MB95-02 to MB95-07	IND Ocean	14	4	1995	06:30	0.921944	56.3333	14	4	1995	14:25	1.55	56.9	17.0434	14.3081
Joe Prospero	Indian	MB95-02 to MB95-07	IND Ocean	14	4	1995	14:25	1.55944	56.9	15	4	1995	05:00	2.53333	57.8	18.3738	12.6562
Joe Prospero	Indian	MB95-02 to MB95-07	IND Ocean	15	4	1995	05:00	2.53611	57.8	15	4	1995	15:50	3.31667	58.55	18.6772	13.5659
Joe Prospero	Indian	MB95-02 to MB95-07	IND Ocean	15	4	1995	15:50	3.34167	58.55	16	4	1995	04:10	4.16667	59.3333	14.8629	10.5442
Joe Prospero	Indian	MB95-02 to MB95-07	IND Ocean	16	4	1995	04:10	4.16889	59.3333	16	4	1995	17:20	5.26667	60.3167	12.7681	9.58835
Joe Prospero	Indian	MB95-02 to MB95-07	IND Ocean	16	4	1995	17:20	5.27583	60.3167	17	4	1995	03:50	6	61	13.3117	10.7903
Joe Prospero	Indian	MB95-02 to MB95-07	IND Ocean	17	4	1995	03:50	6.01361	61	17	4	1995	14:20	7.08333	61.9833	27.4482	37.78
Joe Prospero	Indian	MB95-02 to MB95-07	IND Ocean	17	4	1995	14:20	7.08389	61.9833	18	4	1995	04:00	7.8	62.65	36.5178	52.2105
Joe Prospero	Indian	MB95-02 to MB95-07	IND Ocean	18	4	1995	04:00	7.81	62.65	18	4	1995	13:50	8.5	63.5667	35.5043	41.0607
Joe Prospero	Indian	MB95-02 to MB95-07	IND Ocean	18	4	1995	13:50	8.51	63.5667	19	4	1995	02:45	8.28333	65.6333	32.7887	51.3213
Joe Prospero	Indian	MB95-02 to MB95-07	IND Ocean	19	4	1995	02:45	8.28444	65.6333	19	4	1995	12:30	8.05	67.6833	35.032	55.1771
Joe Prospero	Indian	MB95-02 to MB95-07	IND Ocean	19	4	1995	12:30	8.07361	67.6833	20	4	1995	02:30	7.7	70.9333	36.9149	62.688
Joe Prospero	Indian	MB95-02 to MB95-07	IND Ocean	20	4	1995	02:30	7.7025	70.9333	20	4	1995	12:30	7.35	73.2	21.0006	33.4456
Joe Prospero	Indian	MB95-02 to MB95-07	IND Ocean	20	4	1995	12:30	7.36889	73.2	21	4	1995	02:00	5.53333	75.9667	12.6672	13.6632
Joe Prospero	Indian	MB95-02 to MB95-07	IND Ocean	21	4	1995	02:30	5.55056	75.9667	21	4	1995	12:15	5.33333	77.65	11.914	9.70812
Joe Prospero	Indian	MB95-02 to MB95-07	IND Ocean	28	4	1995	01:57			28	4	1995	13:35	7.46667	72.6667	30.5211	54.8185
Joe Prospero	Indian	MB95-02 to MB95-07	IND Ocean	28	4	1995	13:39	7.47028	72.65	29	4	1995	01:18	7.18333	70.0833	25.0047	45.706
Joe Prospero	Indian	MB95-02 to MB95-07	IND Ocean	29	4	1995	01:20	7.18583	70.0833	29	4	1995	13:38	7.05	69.2333	23.0229	45.0123
Joe Prospero	Indian	MB95-02 to MB95-07	IND Ocean	29	4	1995	13:41	7.06083	69.2333	30	4	1995	01:06	6.93333	67.45	16.8021	35.1551
Joe Prospero	Indian	MB95-02 to MB95-07	IND Ocean	30	4	1995	01:09	6.93833	67.45	1	5	1995	01:32	6.45	62.8667	21.736	33.096
Joe Prospero	Indian	MB95-02 to MB95-07	IND Ocean	1	5	1995	01:35	6.47139	62.8667	1	5	1995	13:30	6.23333	60.85	11.7921	30.3061
Joe Prospero	Indian	MB95-02 to MB95-07	IND Ocean	1	5	1995	13:32	6.25944	60.85	2	5	1995	02:37	5.98333	58.3333	9.20382	15.9594
Joe Prospero	Indian	MB95-02 to MB95-07	IND Ocean	2	5	1995	02:39	6.00028	58.3333	3	5	1995	02:32	5.95	53.2	13.3219	2.20193
Joe Prospero	Indian	MB95-02 to MB95-07	IND Ocean	3	5	1995	02:35	5.45556	53.2	3	5	1995	14:04	5.16667	50.6833	11.7936	1.1343
Joe Prospero	Indian	MB95-02 to MB95-07	IND Ocean	3	5	1995	14:07	5.18222	50.6667	5	5	1995	03:08	5.45	49.2833	12.0971	0.950576
Joe Prospero	Indian	MB95-02 to MB95-07	IND Ocean	5	5	1995	03:10	5.46139	49.2833	5	5	1995	15:11	5.98333	49.4667	6.31363	19.915
Joe Prospero	Indian	MB95-02 to MB95-07	IND Ocean	5	5	1995	15:14	5.99972	49.4667	6	5	1995	03:07	6.86667	50.1667	9.45983	24.3921
Joe Prospero	Indian	MB95-02 to MB95-07	IND Ocean	6	5	1995	03:08	6.86806	50.1667	6	5	1995	15:07	8.25	50.9667	14.8198	14.1961
Joe Prospero	Indian	MB95-02 to MB95-07	IND Ocean	6	5	1995	15:14	8.27194	50.9667	7	5	1995	03:10	8.98333	51.4	7.16046	6.77081
Joe Prospero	Indian	MB95-02 to MB95-07	IND Ocean	7	5	1995	03:11	9.00278	51.4	8	5	1995	15:01	10.2	52.7167	8.4467	14.5395
Joe Prospero	Indian	MB95-02 to MB95-07	IND Ocean	8	5	1995	15:03	10.1994	52.05	10	5	1995	03:10	10.8167	53.4167	10.7966	10.5811
Joe Prospero	Indian	MB95-02 to MB95-07	IND Ocean	10	5	1995	03:11	10.8386	53.4167	11	5	1995	03:06	11.8833	55.2667	17.5307	13.8167
Joe Prospero	Indian	MB95-02 to MB95-07	IND Ocean	11	5	1995	03:08	11.8847	55.2667	12	5	1995	03:24	13.2667	57.6167	14.0708	12.221
Joe Prospero	Indian	MB95-02 to MB95-07	IND Ocean	12	5	1995	03:25	13.2686	57.5667	12	5	1995	11:30	14.05	59	16.5257	14.9589
Joe Prospero	Indian	MB95-02 to MB95-07	IND Ocean	12	5	1995	11:31	14.0758	59	14	5	1995	02:26	15.5167	61.3667	17.2981	25.4254
Joe Prospero	Indian	MB95-02 to MB95-07	IND Ocean	14	5	1995	02:28	15.5181	61.35	15	5	1995	03:17	15.5	61.3667	23.0245	30.8324
Joe Prospero	Indian	MB95-02 to MB95-07	IND Ocean	15	5	1995	03:18	15.5089	61.3667	16	5	1995	03:16	15.9833	62	29.3398	23.9809
Joe Prospero	Indian	MB95-02 to MB95-07	IND Ocean	16	5	1995	03:17	15.9833	62	16	5	1995	14:17	15.9833	61.9667	27.9209	42.2567
Joe Prospero	Indian	MB95-02 to MB95-07	IND Ocean	16	5	1995	14:19	15.9833	61.9833	17	5	1995	07:18	15.9333	61.95	26.2311	31.9887
Joe Prospero	Indian	MB95-02 to MB95-07	IND Ocean	17	5	1995	03:20	15.9333	61.95	18	5	1995	03:04	16.3667	60.0167	17.6889	9.46328
Joe Prospero	Indian	MB95-02 to MB95-07	IND Ocean	18	5	1995	03:06	16.3667	60.0167	19	5	1995	02:54	18	57	16.2404	5.42318
Joe Prospero	Indian	MB95-02 to MB95-07	IND Ocean	19	5	1995	02:55	18	57	21	5	1995	03:16	22.2333	60.55	27.7654	3.34751
Joe Prospero	Indian	MB95-02 to MB95-07	IND Ocean	21	5	1995	03:17	22.2333	60.55	22	5	1995	05:26	22.2833	60.7333	33.1169	22.9881
Joe Prospero	Indian	MB95-02 to MB95-07	IND Ocean	22	5	1995	05:26	22.2833	60.7333	23	5	1995	03:15	22.1833	60.6833	28.7304	10.9338
Joe Prospero	Indian	MB95-02 to MB95-07	IND Ocean	23	5	1995	03:16	22.1833	60.6833	24	5	1995	02:54	23.6333	58.5667	48.6132	9.41588
Joe Prospero	Indian	MB95-02 to MB95-07	IND Ocean	31	5	1995	13:30	23.1833	59.25	1	6	1995	14:40	18.95	58.0333	32.6983	19.0559
Joe Prospero	Indian	MB95-02 to MB95-07	IND Ocean	1	6	1995	14:40	18.95	58.0333	2	6	1995	14:40	14.25	56.4833	19.2612	17.3871
Joe Prospero	Indian	MB95-02 to MB95-07	IND Ocean	2	6	1995	14:40	14.25	56.4833	3	6	1995	03:02	11.3667	56.5	14.1138	14.8492
Joe Prospero	Indian	MB95-02 to MB95-07	IND Ocean	3	6	1995	03:04	11.3667	56.5	5	6	1995	03:00	8.5	50.55	8.48219	0.432987
Joe Prospero	Indian	MB95-02 to MB95-07	IND Ocean	5	6	1995	03:02	8.51667	50.55	7	6	1995	02:55	8.48333	54.65	7.45268	1.20316
Joe Prospero	Indian	MB95-02 to MB95-07	IND Ocean	7	6	1995	02:57	8.48333	54.8167	9	6	1995	02:56	8.5	60.2167	3.72652	2.78334
Joe Prospero	Indian	MB95-02 to MB95-07	IND Ocean	9	6	1995	02:59	8.5	60.2667	10	6	1995	09:31	8.5	60.0333	17.1756	1.22885
Joe Prospero	Indian	MB95-02 to MB95-07	IND Ocean	10	6	1995	09:32	8.5	60.0333	11	6	1995	02:55	8.5	62.2667	5.22526	5.85282
Joe Prospero	Indian	MB95-02 to MB95-07	IND Ocean	11	6	1995	02:57	8.5	62.2833	12	6	1995	01:55	8.48333	64.1667	4.81704	4.181
Joe Prospero	Indian	MB95-02 to MB95-07	IND Ocean	12	6	1995	01:57	8.46667	64.1667	16	6	1995	03:05	7.58333	73.75	4.47693	0.745078
Joe Prospero	Indian	MB95-02 to MB95-07	IND Ocean	16	6	1995	03:09	7.58333	73.75	17	6	1995	03:11	6.05	75.8333	7.16748	12.5311
Joe Prospero	Indian	MB95-02 to MB95-07	IND Ocean	17	6	1995	03:13	6.05	75.8333	18	6	1995	02:36	5.55	77.9	8.0104	5.33036
Joe Prospero	Indian	MB95-02 to MB95-07	IND Ocean	18	6	1995	02:38	5.55	77.9	19	6	1995	04:01	6.55	79.0667	8.17373	12.4849
Joe Prospero	Indian	MB95-02 to MB95-07	IND Ocean	19	6	1995	04:03	6.55	79.0667	19	6	1995	12:50	6.01667	77.7167	17.753	19.686
Joe Prospero	Indian	MB95-02 to MB95-07	IND Ocean	21	6	1995	13:17	4.25	73.7	23	6	1995	03:09	4.8	66.1833	8.08949	3.00367
Joe Prospero	Indian	MB95-02 to MB95-07	IND Ocean	23	6	1995	03:11	4.8	66.1667	23	6	1995	14:00	5.28333	63.9833	3.77965	3.65885
Joe Prospero	Indian	MB95-02 to MB95-07	IND Ocean	23	6	1995	14:00	5.28333	63.9833	24	6	1995	03:43	5.95	61.1667	3.56088	4.71969
Joe Prospero	Indian	MB95-02 to MB95-07	IND Ocean	24	6	1995	03:45	5.95	61.1667	25	6	1995	03:53	4.88333	59.9833	4.36571	2.68543
Joe Prospero	Indian	MB95-02 to MB95-07	IND Ocean	25	6	1995	03:54	4.88333	59.9833	25	6	1995	16:10	3.83333	59	3.76769	2.46521
Joe Prospero	Indian	MB95-02 to MB95-07	IND Ocean	25	6	1995	16:10	3.83333	59	26	6	1995	04:32	3.06667	58.3333	2.7395	2.51418
Joe Prospero	Indian	MB95-02 to MB95-07	IND Ocean	26	6	1995	04:33	3.06667	58.3333	26	6	1995	14:50	2.36667	57.65	2.43785	3.60993
Joe Prospero	Indian	MB95-02 to MB95-07	IND Ocean	26	6	1995	14:50	2.36667	57.65	27	6	1995	03:11	1.63333	56.9833	1.48164	4.4352
Joe Prospero	Indian	MB95-02 to MB95-07	IND Ocean	27	6	1995	03:13	1.63333	56.9833	27	6	1995	14:59	0.733333	56.1667	2.78468	3.7214
Joe Prospero	Indian	MB95-02 to MB95-07	IND Ocean	27	6	1995	14:59	0.733333	56.1667	29	6	1995	04:39	-1.03333	55	2.14743	0.915032
Joe Prospero	Indian	MB95-02 to MB95-07	IND Ocean	29	6	1995	04:40	1.03333	55	29	6	1995	14:30	-2.08333	55.9833	3.33664	5.0092
Joe Prospero	Indian	MB95-02 to MB95-07	IND Ocean	29	6	1995	14:30	2.08333	55.9833	30	6	1995	12:00	-4.58333	55.4833	2.79827	2.60182
Joe Prospero	Indian	MB95-02 to MB95-07	IND Ocean	12	7	1995	11:42	3.7	55.4833	13	7	1995	03:57	-0.366667	54.15	0.842567	43.2388
Joe Prospero	Indian	MB95-02 to MB95-07	IND Ocean	13	7	1995	03:58	0.366667	54.15	13	7	1995	14:55	1.76667	53.3	1.08381	52.7416
Joe Prospero	Indian	MB95-02 to MB95-07	IND Ocean	13	7	1995	14:57	1.76667	53.3	14	7	1995	03:00	3.91667	52.4167	2.63887	12.1713
Joe Prospero	Indian	MB95-02 to MB95-07	IND Ocean	14	7	1995	03:02	3.95	52.4167	18	7	1995	03:03	18.3667	57.75	14.5715	5.69582
Joe Prospero	Indian	MB95-02 to MB95-07	IND Ocean	18	7	1995	03:05	18.3833	57.7667	19	7	1995	03:01	21.4333	59.6333	34.0119	210.644
Joe Prospero	Indian	MB95-02 to MB95-07	IND Ocean	19	7	1995	03:03	21.4333	59.9833	19	7	1995	14:32	22.7667	60	44.9787	8.4694
Joe Prospero	Indian	MB95-02 to MB95-07	IND Ocean	19	7	1995	14:33	22.7667	60	20	7	1995	14:52	24.35	58	57.4014	11.166
Joe Prospero	Indian	MB95-02 to MB95-07	IND Ocean	20	7	1995	14:53	24.35	58.0833	21	7	1995	03:03	24.35	58.1667	53.5169	57.0453
Joe Prospero	Indian	MB95-02 to MB95-07	IND Ocean	21	7	1995	03:05	24.35	58.0028	21	7	1995	15:03	24.3	57.6667	58.3067	135.707
Joe Prospero	Indian	MB95-02 to MB95-07	IND Ocean	21	7	1995	15:04	24.3	57.6667	22	7	1995	02:59	24.1667	57.8833	36.5999	74.7725
Joe Prospero	Indian	MB95-02 to MB95-07	IND Ocean	22	7	1995	03:01	24.1667	57.8833	22	7	1995	15:02	23.2833	59.6833	18.2176	33.6485
Joe Prospero	Indian	MB95-02 to MB95-07	IND Ocean	22	7	1995	15:02	23.2833	59.6833	23	7	1995	03:05	23.1333	59.9	18.523	48.6271
Joe Prospero	Indian	MB95-02 to MB95-07	IND Ocean	23	7	1995	03:07	23.1333	59.8833	23	7	1995	14:54	23.0833	60.0667	23.876	42.4332
Joe Prospero	Indian	MB95-02 to MB95-07	IND Ocean	23	7	1995	14:54	23.0833	60.0667	24	7	1995	10:27	23.6333	58.5667	29.6146	14.3733
Joe Prospero	Indian	MB95-02 to MB95-07	IND Ocean	1	8	1995	02:30	22.7333	60.1667	1	8	1995	15:04	22.1333	60.7	16.3501	9.63001
Joe Prospero	Indian	MB95-02 to MB95-07	IND Ocean	1	8	1995	15:06	22.1333	60.7	2	8	1995	15:05	22.2167	60.7	12.3276	8.24878
Joe Prospero	Indian	MB95-02 to MB95-07	IND Ocean	2	8	1995	15:06	22.2167	60.7	5	8	1995	14:44	18.2833	57.7833	11.6322	0.871799
Joe Prospero	Indian	MB95-02 to MB95-07	IND Ocean	5	8	1995	14:46	18.2833	57.7833	7	8	1995	14:56	16.55	54.8833	6.93954	3.02854
Joe Prospero	Indian	MB95-02 to MB95-07	IND Ocean	7	8	1995	14:57	16.55	54.8833	8	8	1995	14:58	14.7167	51.6833	8.83833	0.83426
Joe Prospero	Indian	MB95-02 to MB95-07	IND Ocean	8	8	1995	14:59	14.7167	51.6833	9	8	1995	15:55	14.05	50.8833	24.3422	5.96218
Joe Prospero	Indian	MB95-02 to MB95-07	IND Ocean	9	8	1995	15:57	14.05	50.8833	10	8	1995	02:38	12.8167	51.3333	14.8259	8.24451
Joe Prospero	Indian	MB95-02 to MB95-07	IND Ocean	10	8	1995	02:38	12.8167	51.3333	12	8	1995	14:36	10.7667	51.85	4.48873	0.4298
Joe Prospero	Indian	MB95-02 to MB95-07	IND Ocean	12	8	1995	14:38	10.7667	51.85	14	8	1995	15:00	12.5667	51.85	4.56424	0.823192
Joe Prospero	Indian	MB95-02 to MB95-07	IND Ocean	14	8	1995	15:02	12.5667	51.85	15	8	1995	03:20	12.0667	55.5	6.73668	16.0464
Joe Prospero	Indian	MB95-02 to MB95-07	IND Ocean	15	8	1995	03:22	13.0667	55.5	15	8	1995	14:44	14.2833	57.7167	2.01859	628.781
Joe Prospero	Indian	MB95-02 to MB95-07	IND Ocean	15	8	1995	14:46	14.2833	57.7167	16	8	1995	14:19	15.5167	61.4	10.5703	12.6991
Joe Prospero	Indian	MB95-02 to MB95-07	IND Ocean	16	8	1995	14:22	15.5167	61.4	17	8	1995	14:30	15.4333	61.6	7.55903	3.13411
Joe Prospero	Indian	MB95-02 to MB95-07	IND Ocean	17	8	1995	14:31	15.4333	61.6	19	8	1995	14:23	15.5833	61.6167	6.31854	1.56114
Joe Prospero	Indian	MB95-02 to MB95-07	IND Ocean	19	8	1995	14:25	15.5833	61.6167	20	8	1995	14:17	13.0667	62.5667	4.27446	5.60063
Joe Prospero	Indian	MB95-02 to MB95-07	IND Ocean	20	8	1995	14:19	13.0667	62.5667	21	8	1995	13:38	10.3833	63.8167	3.84799	4.07407
Joe Prospero	Indian	MB95-02 to MB95-07	IND Ocean	21	8	1995	13:40	10.3833	63.8167	22	8	1995	13:31	6.96667	65	3.06732	1.54593
Joe Prospero	Indian	MB95-02 to MB95-07	IND Ocean	22	8	1995	13:33	6.96667	65	23	8	1995	02:19	4.53333	66.05	2.2083	1.63997
Joe Prospero	Indian	MB95-02 to MB95-07	IND Ocean	23	8	1995	02:19	4.53333	66.05	25	8	1995	02:08	0.766667	68.0167	1.72323	0.699076
Joe Prospero	Indian	MB95-02 to MB95-07	IND Ocean	25	8	1995	02:08	-0.7	68.0167	25	8	1995	13:22	2.26667	61.9167	2.71654	3.97512
Joe Prospero	Indian	MB95-02 to MB95-07	IND Ocean	25	8	1995	13:24	-2.26667	61.9167	26	8	1995	01:21	-4.48333	69.9167	3.09505	3.12445
Joe Prospero	Indian	MB95-02 to MB95-07	IND Ocean	26	8	1995	01:21	-4.48333	69.9167	26	8	1995	12:47	-6.55	70.8	2.27737	2.92758
Joe Prospero	Indian	MB95-02 to MB95-07	IND Ocean	26	8	1995	12:49	-6.55	70.8	29	8	1995	13:01	-7.75	73.0667	2.57018	3.08966
Joe Prospero	Indian	MB95-02 to MB95-07	IND Ocean	29	8	1995	13:03	-7.75	73.0667	30	8	1995	01:17	-8.95	75.05	2.17105	3.17734
Joe Prospero	Indian	MB95-02 to MB95-07	IND Ocean	30	8	1995	01:17	-8.95	75.05	30	8	1995	11:48	-10	76.7667	3.20435	3.12672
Joe Prospero	Indian	MB95-02 to MB95-07	IND Ocean	30	8	1995	11:50	-10	76.7667	31	8	1995	01:16	-11.3	78.95	7.12578	8.36415
Joe Prospero	Indian	MB95-02 to MB95-07	IND Ocean	31	8	1995	01:16	-11.3	78.95	31	8	1995	12:46	-12.4	80.7833	9.21894	8.27729
Joe Prospero	Indian	MB95-02 to MB95-07	IND Ocean	31	8	1995	12:48	-12.4	80.7833	2	9	1995	01:20	-15.8833	86.6667	12.3329	5.75586
Joe Prospero	Indian	MB95-02 to MB95-07	IND Ocean	2	9	1995	01:20	-15.8833	86.6667	2	9	1995	11:40	-17.0167	88.6167	11.0829	7.83697
Joe Prospero	Indian	MB95-02 to MB95-07	IND Ocean	2	9	1995	11:42	-17.0167	88.6167	3	9	1995	01:17	-18.5167	91.1833	4.10286	3.03156
Joe Prospero	Indian	MB95-02 to MB95-07	IND Ocean	3	9	1995	01:17	-18.5167	91.1833	3	9	1995	11:39	-19.7	93.2333	2.56031	0.264789
Joe Prospero	Indian	MB95-02 to MB95-07	IND Ocean	3	9	1995	11:41	-19.7	93.2333	4	9	1995	01:14	-21.3333	96.1	1.57936	0.728537
Joe Prospero	Indian	MB95-02 to MB95-07	IND Ocean	4	9	1995	01:14	-21.3333	96.1	4	9	1995	23:30	-22.1167	101.267	999	9.59298
Joe Prospero	Indian	MB95-02 to MB95-07	IND Ocean	4	9	1995	23:30	-22.1167	101.267	7	9	1995	10:10	-29.2667	111.867	1.93177	0.694673
Joe Prospero	Indian	MB95-02 to MB95-07	IND Ocean	22	9	1995	23:12	-35.2833	114.567	23	9	1995	23:00	-39	110.7	1.04627	3.82588
Joe Prospero	Indian	MB95-02 to MB95-07	IND Ocean	23	9	1995	23:00	-39	110.7	30	9	1995	01:11	-37.3667	95	1.36308	0.438548
Joe Prospero	Indian	MB95-02 to MB95-07	IND Ocean	30	9	1995	01:14	-37.3667	95	1	10	1995	00:29	-34.5833	95	1.05983	1.95233
Joe Prospero	Indian	MB95-02 to MB95-07	IND Ocean	1	10	1995	00:31	-34.5833	95	2	10	1995	00:42	-32	94.9833	1.23326	2.47881
Joe Prospero	Indian	MB95-02 to MB95-07	IND Ocean	2	10	1995	00:43	-32	94.9833	5	10	1995	11:24	-35.0333	83.7167	1.05985	0.946978
Joe Prospero	Indian	MB95-02 to MB95-07	IND Ocean	5	10	1995	11:27	-35.0333	83.7167	6	10	1995	01:19	-35.4333	82.1833	3.29993	7.56799
Joe Prospero	Indian	MB95-02 to MB95-07	IND Ocean	6	10	1995	01:22	-35.4333	82.1833	8	10	1995	01:20	-32.1667	80	0.8351	1.56161
Joe Prospero	Indian	MB95-02 to MB95-07	IND Ocean	8	10	1995	01:22	-32.1667	80	9	10	1995	01:19	-28.9833	79.9833	1.04747	1.72287
Joe Prospero	Indian	MB95-02 to MB95-07	IND Ocean	9	10	1995	01:19	-28.9833	79.9833	10	10	1995	00:31	-25.9833	79.9833	2.90272	2.8176
Anne Johansen	Indian	M32/3			5	1995		16.26	64.9962							14.1557	42.9162
Anne Johansen	Indian	M32/3			5	1995		16.74	64.9987							12.1714	37.011
Anne Johansen	Indian	M32/3			5	1995		18	65.0008							19.6302	38.058
Anne Johansen	Indian	M32/3			5	1995		18	65.009							14.0504	32.9652
Anne Johansen	Indian	M32/3			5	1995		18.04	65.0337							13.8462	16.9722
Anne Johansen	Indian	M32/3			5	1995		18.09	65.0522							11.4751	23.5148
Anne Johansen	Indian	M32/3			5	1995		18.11	65.0436							18.6946	15.5815
Anne Johansen	Indian	M32/3			5	1995		18.13	65.0415							20.9424	16.6025
Anne Johansen	Indian	M32/3			5	1995		18.13	65.0489							24.3457	14.978
Anne Johansen	Indian	M32/3			5	1995		18.13	65.0537							28.1287	16.3251
Anne Johansen	Indian	M32/3			5	1995		18.12	65.0965							32.083	16.8446
Anne Johansen	Indian	M32/3			5	1995		18.09	65.1476							24.4872	5.997
Anne Johansen	Indian	M32/3			5	1995		14.29	65.0228							18.1744	13.2378
Anne Johansen	Indian	M32/3			5	1995		11.5	65.0021							20.9885	7.482
Anne Johansen	Indian	M32/3			5	1995		10	64.9766							27.436	9.42418
Anne Johansen	Indian	M32/3			5	1995		10.02	64.9437							35.0979	9.95069
Anne Johansen	Indian	M32/3			5	1995		10.03	64.9246							21.7272	18.2182
Anne Johansen	Indian	M32/3			5	1995		10	64.8709							19.2641	13.7726
Anne Johansen	Indian	M32/3			5	1995		9.98	64.8222							19.4805	20.603
Anne Johansen	Indian	M32/3			5	1995		9.93	64.7801							27.1272	15.123
Anne Johansen	Indian	M32/3			5	1995		9.49	64.8588							22.1769	15.7327
Anne Johansen	Indian	M32/3			5	1995		7.52	64.9944							23.3626	13.8493
Anne Johansen	Indian	M32/3			5	1995		4.5	64.9975							9.59094	5.43524
Anne Johansen	Indian	M32/3			5	1995		2.97	65.03							10.7381	2.5707
Anne Johansen	Indian	M32/3			5	1995		2.87	65.1022							10.6234	3.55454
Anne Johansen	Indian	M32/3			5	1995		1.4	65.075							14.8361	2.51444
Anne Johansen	Indian	M32/3			5	1995		0	65							19.3282	5.56143
Anne Johansen	Indian	M32/5			7	1995		-0.57	63.483							3.74507	1.628
Anne Johansen	Indian	M32/5			7	1995		1.51	65.4797							5.47006	1.83633
Anne Johansen	Indian	M32/5			7	1995		3.06	64.9933							9.78675	3.71849
Anne Johansen	Indian	M32/5			7	1995		6.04	64.55							4.95706	1.3339
Anne Johansen	Indian	M32/5			7	1995		10	65.0083							8.11006	1.21545
Anne Johansen	Indian	M32/5			7	1995		13	65							7.77042	5.64277
Anne Johansen	Indian	M32/5			7	1995		14.48	65							5.30619	2.40846
Anne Johansen	Indian	M32/5			7	1995		15.24	63.4808							5.7595	2.40538
Anne Johansen	Indian	M32/5			7	1995		16.08	62.0283							5.81124	1.77161
Anne Johansen	Indian	M32/5			7	1995		16.68	60.8842							9.64426	2.95612
Anne Johansen	Indian	M32/5			7	1995		17.13	59.96							9.62168	2.3089
Anne Johansen	Indian	M32/5			7	1995		17.63	58.9317							9.55573	8.56849
Anne Johansen	Indian	M32/5			7	1995		18.4	57.6283							8.13714	2.89739
Anne Johansen	Indian	M32/5			7	1995		18.56	57.4408							10.3216	2.1146
Anne Johansen	Indian	M32/5			7	1995		18.41	57.8933							5.8561	1.64289
Anne Johansen	Indian	M32/5			7	1995		17.96	58.5858							8.3848	2.72699
Anne Johansen	Indian	M32/5			7	1995		17.43	59.3687							6.83128	1.19772
Anne Johansen	Indian	M32/5			7	1995		16.35	60.1392							7.40364	1.60241
Anne Johansen	Indian	M32/5			7	1995		16.16	61.5733							6.98343	1.38653
Anne Johansen	Indian	M32/5			7	1995		16.03	61.8648							8.73603	2.07213
Joe Prospero	Indian	SK109	IND	10	1	1996	1900-01-12	2.06722	59.9883	11	1	1996	11:55	-0.3725	60.0089	16.7423	63.7989
Joe Prospero	Indian	SK109	IND	11	1	1996	1900-01-12	-0.3725	60.0089	12	1	1996	11:45	-3.01722	60.01	18.9592	72.6479
Joe Prospero	Indian	SK109	IND	12	1	1996	1900-01-11 10:48:00	-3.01722	60.01	13	1	1996	12:00	-5.02306	61.1286	15.2282	48.9902
Joe Prospero	Indian	SK109	IND	13	1	1996	1900-01-12	-5.02306	61.1286	14	1	1996	12:00	-5.00972	65.0036	12.237	40.4095
Joe Prospero	Indian	SK109	IND	14	1	1996	1900-01-12	-5.00972	65.0036	15	1	1996	12:00	-3.38639	65.0056	19.2605	73.2064
Joe Prospero	Indian	SK109	IND	15	1	1996	1900-01-12	-3.38639	65.0056	16	1	1996	12:00	-2.18361	64.9744	19.9479	84.454
Joe Prospero	Indian	SK109	IND	16	1	1996	1900-01-12	-2.18361	64.9744	17	1	1996	12:00	-1.11639	64.9792	6.82311	29.4029
Joe Prospero	Indian	SK109	IND	17	1	1996	1900-01-12	-1.11639	64.9792	18	1	1996	12:00	-0.378889	65.0078	3.47208	15.2452
Joe Prospero	Indian	SK109	IND	18	1	1996	1900-01-12	-0.378889	65.0078	19	1	1996	12:00	2.02194	64.9672	1.71358	5.35876
Joe Prospero	Indian	SK109	IND	19	1	1996	1900-01-12	2.02194	64.9672	20	1	1996	12:00	4.48806	65.0228	5.45344	11.5962
Joe Prospero	Indian	SK109	IND	20	1	1996	1900-01-12	4.48806	65.0228	21	1	1996	12:00	4.98972	66.9978	18.6973	42.1211
Joe Prospero	Indian	SK109	IND	21	1	1996	1900-01-12	4.98972	66.9978	22	1	1996	12:00	4.49278	68.9908	31.6575	80.2351
Joe Prospero	Indian	SK109	IND	22	1	1996	1900-01-12	4.49278	68.9908	23	1	1996	12:00	2.05	70.4928	26.4261	79.2585
Joe Prospero	Indian	SK109	IND	23	1	1996	1900-01-12	2.05	70.4928	24	1	1996	12:00	-0.343611	72.3975	22.8192	69.8216
Joe Prospero	Indian	SK109	IND	24	1	1996	1900-01-12	-0.343611	72.3975	25	1	1996	12:00	-3.13889	74.5578	15.2386	51.2217
Joe Prospero	Indian	SK109	IND	25	1	1996	1900-01-12	-3.13889	74.5578	26	1	1996	12:00	-4.00083	75.9856	6.96476	25.0301
Joe Prospero	Indian	SK109	IND	26	1	1996	1900-01-12	-4.00083	75.9856	27	1	1996	12:00	-1.56833	76.0192	15.5233	61.1133
Joe Prospero	Indian	SK109	IND	27	1	1996	1900-01-12	-1.56833	76.0192	28	1	1996	12:00	0.51	75.9708	23.6168	57.7542
Joe Prospero	Indian	SK109	IND	28	1	1996	1900-01-12	0.51	75.9708	29	1	1996	12:00	2.40889	76.0569	24.5744	57.3071
Joe Prospero	Indian	SK109	IND	29	1	1996	1900-01-12	2.40889	76.0569	30	1	1996	12:00	4.85222	76.0017	19.5948	49.1676
Joe Prospero	Indian	SK109	IND	30	1	1996	1900-01-12	4.85222	76.0017	31	1	1996	12:00	7.56056	75.975	42.5176	72.034
Joe Prospero	Indian	SK109	IND	31	1	1996	1900-01-12	7.56056	75.975	1	2	1996	12:00	10.9022	75.1544	86.6676	192.521
Joe Prospero	Indian	SK109	IND	1	2	1996	1900-01-12	10.9272	75.1544	2	2	1996	12:00	14.3558	73.8922	64.1208	129.088
Joe Prospero	Indian	SK109	IND	2	2	1996	1900-01-12	14.3558	73.8922	3	2	1996	12:00	16.5678	73.0239	131.444	327.719
Dr. Manmohan Sarin, sarin@prl.res.in	Indian	SS164	10		3	1996		12	74							16.128	999
Dr. Manmohan Sarin, sarin@prl.res.in	Indian	SS164	11		3	1996		16	69.5							30.6432	999
Dr. Manmohan Sarin, sarin@prl.res.in	Indian	SS164	12		3	1996		20	64							32.256	999
Dr. Manmohan Sarin, sarin@prl.res.in	Indian	SS164	13		3	1996		16.5	59.5							12.9024	999
Dr. Manmohan Sarin, sarin@prl.res.in	Indian	SS164	14		3	1996		13	53							20.9664	999
Dr. Manmohan Sarin, sarin@prl.res.in	Indian	SS164	15		3	1996		4	56.5							9.6768	999
Dr. Manmohan Sarin, sarin@prl.res.in	Indian	SS164	16		3	1996		6	64							22.5792	999
Dr. Manmohan Sarin, sarin@prl.res.in	Indian	SS164	17		3	1996		12.5	64							9.6768	999
Joe Prospero	Indian	SK120	IND	30	12	1996	07:40	7.71806	75.4194	30	12	1996	20:30	6.26389	75.5833	999	90.8787
Joe Prospero	Indian	SK120	IND	30	12	1996	20:35	6.25139	75.5833	31	12	1996	08:30	4.71944	75.9917	999	43.1865
Joe Prospero	Indian	SK120	IND	31	12	1996	08:35	4.71944	75.9917	31	12	1996	22:00	2.95	76.35	999	47.7342
Joe Prospero	Indian	SK120	IND	31	12	1996	22:10	2.95	76.35	1	1	1997	09:20	1.43889	76.7	999	60.8269
Joe Prospero	Indian	SK120	IND	1	1	1997	08:15	1.43889	76.7	1	1	1997	20:15	0.00138889	77.0044	999	44.8969
Joe Prospero	Indian	SK120	IND	1	1	1997	20:20	0.00138889	77.0044	2	1	1997	08:20	-1.46389	77.3167	999	36.6713
Joe Prospero	Indian	SK120	IND	2	1	1997	08:20	-1.46389	77.3167	2	1	1997	20:15	-3.11667	77.6944	999	29.9054
Joe Prospero	Indian	SK120	IND	2	1	1997	20:20	-3.11667	77.6944	3	1	1997	08:15	-4.71944	78.1194	999	7.29267
Joe Prospero	Indian	SK120	IND	3	1	1997	08:15	-4.71944	78.1194	3	1	1997	20:05	-6.21944	78.4528	999	7.08746
Joe Prospero	Indian	SK120	IND	3	1	1997	20:10	-6.21944	78.4528	4	1	1997	20:10	-7.59444	78.6889	999	1.93163
Joe Prospero	Indian	SK120	IND	4	1	1997	08:25	-7.59444	78.6889	4	1	1997	20:20	-9.03056	78.9417	999	1.36988
Joe Prospero	Indian	SK120	IND	4	1	1997	20:25	-9.03056	78.9417	5	1	1997	08:15	-9.49444	78.9778	999	6.04305
Joe Prospero	Indian	SK120	IND	5	1	1997	08:20	-9.49444	78.9778	6	1	1997	08:20	-11.01	78.9306	999	3.25551
Joe Prospero	Indian	SK120	IND	6	1	1997	08:20	-11.01	78.9306	7	1	1997	08:20	-12.05	79	999	3.50075
Joe Prospero	Indian	SK120	IND	7	1	1997	08:20	-12.05	79	7	1	1997	20:20	-12.9583	79.1278	999	3.24098
Joe Prospero	Indian	SK120	IND	7	1	1997	20:20	-12.9583	79.1278	8	1	1997	08:15	-13.8833	79	999	5.20848
Joe Prospero	Indian	SK120	IND	8	1	1997	08:15	-13.8833	79	9	1	1997	08:35	-13.7	77.0167	999	1.30212
Joe Prospero	Indian	SK120	IND	9	1	1997	08:35	-13.7	77.0167	9	1	1997	20:10	-12.9389	77.1139	999	1.65489
Joe Prospero	Indian	SK120	IND	9	1	1997	20:10	-12.9389	77.1139	10	1	1997	08:30	-12.8444	77.3194	999	4.62329
Joe Prospero	Indian	SK120	IND	10	1	1997	08:30	-12.8444	77.3194	10	1	1997	20:35	-12.1083	77.0917	999	1.39809
Joe Prospero	Indian	SK120	IND	10	1	1997	20:35	-12.1083	77.0917	11	1	1997	08:30	-12.0639	77.25	999	1.76411
Joe Prospero	Indian	SK120	IND	11	1	1997	08:30	-12.0639	77.25	12	1	1997	08:30	-10.2083	77	999	2.5136
Joe Prospero	Indian	SK120	IND	12	1	1997	08:30	-10.2083	77	13	1	1997	10:00	-9.39167	76.6667	999	4.87789
Joe Prospero	Indian	SK120	IND	13	1	1997	10:00	-9.39167	76.6667	14	1	1997	09:05	-10.0889	75.6833	999	3.76216
Joe Prospero	Indian	SK120	IND	14	1	1997	09:05	-10.0889	75.6833	16	1	1997	11:25	-9.9	75.0667	999	6.45222
Joe Prospero	Indian	SK120	IND	16	1	1997	11:25	-9.9	75.0667	17	1	1997	11:30	-12.1417	74.9667	999	3.85875
Joe Prospero	Indian	SK120	IND	17	1	1997	11:30	-12.1417	74.9667	18	1	1997	10:45	-14	74.9556	999	3.81092
Joe Prospero	Indian	SK120	IND	18	1	1997	10:45	-14	74.9556	19	1	1997	09:15	-13.4167	73	999	5.19032
Joe Prospero	Indian	SK120	IND	19	1	1997	09:25	-13.4167	73	20	1	1997	08:25	-11.9306	73	999	3.65969
Joe Prospero	Indian	SK120	IND	20	1	1997	08:30	-11.9306	73	21	1	1997	09:15	-10.9972	71	999	2.06643
Joe Prospero	Indian	SK120	IND	21	1	1997	09:20	-10.9972	71	22	1	1997	19:30	-13.925	71.0056	999	3.0346
Joe Prospero	Indian	SK120	IND	22	1	1997	19:30	-13.925	71.0056	23	1	1997	07:20	-12.9917	71.3778	999	5.4248
Joe Prospero	Indian	SK120	IND	23	1	1997	07:25	-12.9917	71.3778	23	1	1997	19:30	-11.2889	72	999	5.67805
Joe Prospero	Indian	SK120	IND	23	1	1997	19:35	-11.2889	72	24	1	1997	07:30	-9.49167	72.6583	999	8.38011
Joe Prospero	Indian	SK120	IND	24	1	1997	07:35	-9.49167	72.6583	24	1	1997	19:50	-7.65833	73.3306	999	31.1488
Joe Prospero	Indian	SK120	IND	24	1	1997	19:55	-7.65833	73.3306	25	1	1997	07:25	-5.79167	74.0139	999	50.1985
Joe Prospero	Indian	SK120	IND	25	1	1997	07:27	-5.79167	74.0139	25	1	1997	19:40	-3.87778	74.3694	999	31.0242
Joe Prospero	Indian	SK120	IND	25	1	1997	19:45	-3.87778	74.3694	26	1	1997	07:45	-2.06667	74.3694	999	62.9024
Joe Prospero	Indian	SK120	IND	26	1	1997	07:50	-2.06667	74.3694	26	1	1997	19:45	-0.419444	74.3667	999	77.0944
Joe Prospero	Indian	SK120	IND	26	1	1997	19:48	-0.419444	74.3667	27	1	1997	08:05	1.35	74.375	999	66.5939
Joe Prospero	Indian	SK120	IND	27	1	1997	08:08	1.35	74.375	27	1	1997	19:40	3.08889	74.3667	999	71.0127
Joe Prospero	Indian	SK120	IND	27	1	1997	19:45	3.08889	74.3667	28	1	1997	08:03	8.46667	74.3667	999	106.631
Dr. Manmohan Sarin, sarin@prl.res.in	Indian	SK121	1		2	1997		20	68							66.1248	999
Dr. Manmohan Sarin, sarin@prl.res.in	Indian	SK121	2		2	1997		20	68							29.0304	999
Dr. Manmohan Sarin, sarin@prl.res.in	Indian	SK121	3		2	1997		20	68							35.4816	999
Dr. Manmohan Sarin, sarin@prl.res.in	Indian	SK121	4		2	1997		20	68							25.8048	999
Dr. Manmohan Sarin, sarin@prl.res.in	Indian	SK121	5		2	1997		20	68							9.6768	999
Dr. Manmohan Sarin, sarin@prl.res.in	Indian	SK121	6		2	1997		20	68							35.4816	999
Dr. Manmohan Sarin, sarin@prl.res.in	Indian	SK121	7		2	1997		20	68							9.6768	999
Dr. Manmohan Sarin, sarin@prl.res.in	Indian	SK121	8		2	1997		20	68							29.0304	999
Dr. Manmohan Sarin, sarin@prl.res.in	Indian	SK121	9		2	1997		20	68							35.4816	999
Dr. Manmohan Sarin, sarin@prl.res.in	Indian	SS152	18		2	1997		7.5	76							51.6096	999
Dr. Manmohan Sarin, sarin@prl.res.in	Indian	SS152	19		2	1997		3.5	75.5							32.256	999
Dr. Manmohan Sarin, sarin@prl.res.in	Indian	SS152	20		2	1997		8.5	85.5							9.6768	999
Dr. Manmohan Sarin, sarin@prl.res.in	Indian	SS152	21		2	1997		12	80							14.5152	999
Dr. Manmohan Sarin, sarin@prl.res.in	Indian	SS152	22		2	1997		16	82							24.192	999
Dr. Manmohan Sarin, sarin@prl.res.in	Indian	SS152	23		2	1997		12.5	84							11.2896	999
Anne Johansen	Indian	SO117			3	1997		6	65							15.3582	35.2753
Anne Johansen	Indian	SO117			3	1997		6	65							22.5525	42.6022
Anne Johansen	Indian	SO117			3	1997		6	65							23.9088	52.8851
Anne Johansen	Indian	SO117			3	1997		6.25	65							17.1686	56.599
Anne Johansen	Indian	SO117			3	1997		7	65							12.0618	40.9775
Anne Johansen	Indian	SO117			3	1997		9	65							14.1551	50.1768
Anne Johansen	Indian	SO117			3	1997		10	65							15.6571	80.787
Anne Johansen	Indian	SO117			3	1997		10	65							2.28706	50.5714
Anne Johansen	Indian	SO117			3	1997		11	65							13.0908	47.0299
Anne Johansen	Indian	SO117			3	1997		12.5	65							25.2035	71.0285
Anne Johansen	Indian	SO117			3	1997		13.785	64.9							18.0079	27.2372
Anne Johansen	Indian	SO117			3	1997		14.57	64.8							16.9349	14.8853
Anne Johansen	Indian	SO117			3	1997		14.57	64.8							16.2359	14.0755
Anne Johansen	Indian	SO117			3	1997		15.285	64.9							16.7687	19.303
Anne Johansen	Indian	SO117			3	1997		17	65							13.3383	38.4786
Anne Johansen	Indian	SO117			3	1997		18	65							14.3553	43.3785
Anne Johansen	Indian	SO117			3	1997		18	65							16.7596	30.7846
Anne Johansen	Indian	SO117			3	1997		17.65	65.9							3.32126	48.1933
Anne Johansen	Indian	SO117			3	1997		16.52	67.765							11.1955	60.6824
Anne Johansen	Indian	SO117			3	1997		15.845	68.79							13.6582	21.8603
Anne Johansen	Indian	SO117			3	1997		15.95	68.855							8.74933	16.6894
Anne Johansen	Indian	SO117			3	1997		15.665	66.03							12.4579	35.813
Anne Johansen	Indian	SO117			3	1997		15.7525	62.235							10.1549	38.7
Anne Johansen	Indian	SO117			3	1997		16.1975	60.75							10.2182	28.288
Anne Johansen	Indian	SO117			3	1997		16.25	60.2							10.5842	28.109
Anne Johansen	Indian	SO117			3	1997		16.17	59.8							15.5108	23.0016
Anne Johansen	Indian	SO117			3	1997		18.21	59.9							7.30245	17.5401
Joe Prospero	Indian	SK133	IND	24	2	1998	08:00	4.95833	73.3733	27	2	1998	17:30	4.95833	73.3733	26.9925	62.8971
Joe Prospero	Indian	SK133	IND	27	2	1998	17:30	4.95833	73.3733	28	2	1998	06:30	4.965	73.4067	45.25	116.191
Joe Prospero	Indian	SK133	IND	28	2	1998	06:30	4.965	73.4067	28	2	1998	18:15	4.965	73.415	34.7948	112.323
Joe Prospero	Indian	SK133	IND	28	2	1998	18:15	4.965	73.415	1	3	1998	06:15	4.94667	73.3817	40.1507	105.189
Joe Prospero	Indian	SK133	IND	1	3	1998	06:15	4.94667	73.3817	1	3	1998	18:10	4.03667	73.61	46.5107	83.3122
Joe Prospero	Indian	SK133	IND	1	3	1998	18:10	4.03667	73.61	2	3	1998	06:10	2.16233	73.9845	47.7824	89.7295
Joe Prospero	Indian	SK133	IND	2	3	1998	06:10	2.16233	73.9845	2	3	1998	18:10	0.293333	74	41.1448	107.52
Joe Prospero	Indian	SK133	IND	2	3	1998	18:10	0.293333	74	3	3	1998	06:10	-0.983333	73.23	36.2843	73.0155
Joe Prospero	Indian	SK133	IND	3	3	1998	06:10	-0.983333	73.23	3	3	1998	18:10	-2	72.3933	34.5292	89.5822
Joe Prospero	Indian	SK133	IND	3	3	1998	18:10	-2	72.3933	4	3	1998	18:10	-4.19317	70.6397	37.9028	86.5477
Joe Prospero	Indian	SK133	IND	4	3	1998	18:10	-4.19317	70.6397	5	3	1998	18:10	-6.3775	68.8955	24.0699	43.4858
Joe Prospero	Indian	SK133	IND	5	3	1998	18:10	-6.3775	68.8955	6	3	1998	18:10	-8.37067	67.1905	23.249	49.4233
Joe Prospero	Indian	SK133	IND	6	3	1998	18:10	-8.37067	67.1905	7	3	1998	18:10	-9.75067	66.62	7.58459	18.9157
Joe Prospero	Indian	SK133	IND	7	3	1998	18:10	-9.75067	66.62	8	3	1998	06:05	-10.5807	65.352	5.10882	12.705
Joe Prospero	Indian	SK133	IND	8	3	1998	06:05	-10.5807	65.352	8	3	1998	18:00	-11.4383	64.634	4.01652	9.54291
Joe Prospero	Indian	SK133	IND	8	3	1998	18:00	-11.4383	64.634	9	3	1998	06:15	-12.401	64.3662	2.77455	4.51366
Joe Prospero	Indian	SK133	IND	9	3	1998	06:15	-12.401	63.8562	9	3	1998	18:05	-13.3422	63.1883	2.10722	2.34508
Joe Prospero	Indian	SK133	IND	9	3	1998	18:05	-13.3422	63.1883	10	3	1998	06:10	-14.5405	62.2618	1.16133	1.1397
Joe Prospero	Indian	SK133	IND	10	3	1998	06:10	-14.5405	62.2618	10	3	1998	18:05	-15.7675	61.3277	2.98487	2.45334
Joe Prospero	Indian	SK133	IND	10	3	1998	18:05	-15.7675	61.3277	11	3	1998	06:00	-17.1867	60.2468	1.20615	0.884016
Joe Prospero	Indian	SK133	IND	17	3	1998	17:20	-15.377	61.3312	18	3	1998	06:00	-14.1555	61.9662	3.05461	1.48642
Joe Prospero	Indian	SK133	IND	18	3	1998	06:00	-14.1555	61.9662	18	3	1998	17:55	-12.8622	62.6067	4.41236	2.67014
Joe Prospero	Indian	SK133	IND	18	3	1998	17:55	-12.8622	62.6067	19	3	1998	06:10	-11.8198	63.1	1.34189	1.1064
Joe Prospero	Indian	SK133	IND	19	3	1998	06:10	-11.8198	63.1	19	3	1998	18:00	-10.2905	63.8723	1.82424	2.09649
Joe Prospero	Indian	SK133	IND	19	3	1998	18:00	-10.2905	63.8723	20	3	1998	06:00	-9.06983	64.4773	1.99128	3.26502
Joe Prospero	Indian	SK133	IND	20	3	1998	06:00	-9.06983	64.4773	20	3	1998	17:55	-7.755	65.1377	1.64597	3.67731
Joe Prospero	Indian	SK133	IND	20	3	1998	17:55	-7.755	65.1377	21	3	1998	06:00	-6.594	65.727	0.470221	2.69864
Joe Prospero	Indian	SK133	IND	21	3	1998	06:00	-6.594	65.727	21	3	1998	18:00	-5.10417	66.5063	1.24779	3.7304
Joe Prospero	Indian	SK133	IND	21	3	1998	18:00	-5.10417	66.5063	22	3	1998	06:10	-3.70817	67.1775	0.893227	4.44927
Joe Prospero	Indian	SK133	IND	22	3	1998	06:10	-3.70817	67.1775	22	3	1998	18:00	-2.44967	67.7997	1.62211	7.72186
Joe Prospero	Indian	SK133	IND	22	3	1998	18:00	-2.44967	67.7997	23	3	1998	06:30	-1.5	68.486	3.75012	12.2428
Joe Prospero	Indian	SK133	IND	23	3	1998	06:30	-1.5	68.486	23	3	1998	18:00	0.484667	68.9993	6.29811	18.9316
Joe Prospero	Indian	SK133	IND	23	3	1998	18:00	0.484667	68.9993	24	3	1998	06:40	1.94117	69.0007	9.58619	24.9919
Joe Prospero	Indian	SK133	IND	24	3	1998	06:40	1.94117	69.0007	24	3	1998	17:55	3.15917	69.0078	30.1149	97.2242
Joe Prospero	Indian	SK133	IND	24	3	1998	17:55	3.15917	69.0078	25	3	1998	06:15	4.45483	69.1613	40.8313	116.007
Joe Prospero	Indian	SK133	IND	25	3	1998	06:15	4.45483	69.1613	25	3	1998	17:50	6.17467	69.0023	41.6696	104.942
Joe Prospero	Indian	SK133	IND	25	3	1998	17:50	6.17467	69.0023	26	3	1998	06:00	7.77317	69.0053	54.5147	111.035
Joe Prospero	Indian	SK133	IND	26	3	1998	06:00	7.77317	69.0053	26	3	1998	17:55	9.25833	68.9997	48.4034	82.0316
Joe Prospero	Indian	SK133	IND	26	3	1998	17:55	9.25833	68.9997	27	3	1998	06:10	10.656	68.4242	70.9784	55.1723
Joe Prospero	Indian	SK133	IND	27	3	1998	06:10	10.656	68.4242	27	3	1998	17:50	12.209	68.2595	93.039	95.661
Joe Prospero	Indian	SK133	IND	27	3	1998	17:50	12.209	68.2595	28	3	1998	05:50	13.6243	68.2608	57.3534	63.2525
Joe Prospero	Indian	SK133	IND	28	3	1998	05:50	13.6243	68.2608	28	3	1998	17:00	14.6967	69.1152	60.3116	46.4341
Dr. Manmohan Sarin, sarin@prl.res.in	Indian	SS172	24		2	1999		17.5	83.5							46.7712	999
Dr. Manmohan Sarin, sarin@prl.res.in	Indian	SS172	25		2	1999		17	85							19.3536	999
Dr. Manmohan Sarin, sarin@prl.res.in	Indian	SS172	26		2	1999		13	90.5							19.3536	999
Dr. Manmohan Sarin, sarin@prl.res.in	Indian	SS172	27		2	1999		11	89							25.8048	999
Dr. Manmohan Sarin, sarin@prl.res.in	Indian	SS172	28		2	1999		6	93							24.192	999
Dr. Manmohan Sarin, sarin@prl.res.in	Indian	SS172	29		2	1999		4.5	91							30.6432	999
PMEL	Indian	AEROINDO99	75	24	2	1999		-18.159	57.857							1.15475	2.21742
PMEL	Indian	AEROINDO99	76	24	2	1999		-15.817	58.329							1.20635	2.05111
PMEL	Indian	AEROINDO99	77	24	2	1999		-14.996	58.497							1.32893	2.55003
PMEL	Indian	AEROINDO99	78	25	2	1999		-13.213	58.849							0.458028	1.77393
PMEL	Indian	AEROINDO99	79	25	2	1999		-11.506	59.191							0.453189	2.77177
PMEL	Indian	AEROINDO99	80	25	2	1999		-10.594	59.36							0.435449	3.54787
PMEL	Indian	AEROINDO99	81	26	2	1999		-9.377	59.599							0.419321	4.93375
PMEL	Indian	AEROINDO99	82	26	2	1999		-8.198	59.831							0.451576	4.04679
PMEL	Indian	AEROINDO99	83	26	2	1999		-7.378	60.722							0.617692	6.37508
PMEL	Indian	AEROINDO99	84	26	2	1999		-6.75	61.355							0.438674	7.76096
PMEL	Indian	AEROINDO99	85	27	2	1999		-5.686	62.111							0.667688	7.31748
PMEL	Indian	AEROINDO99	86	27	2	1999		-4.865	63.079							0.885412	5.43267
PMEL	Indian	AEROINDO99	87	27	2	1999		-3.818	64.309							0.419321	9.47946
PMEL	Indian	AEROINDO99	88	27	2	1999		-3.23	65							0.287074	7.65009
PMEL	Indian	AEROINDO99	89	28	2	1999		-2.258	66.145							0.395129	7.76096
PMEL	Indian	AEROINDO99	90	28	2	1999		-1.503	67.031							0.751552	10.699
PMEL	Indian	AEROINDO99	91	28	2	1999		-0.686	67.991							0.999919	7.48379
PMEL	Indian	AEROINDO99	92	28	2	1999		-0.107	68.666							1.96274	12.7502
PMEL	Indian	AEROINDO99	93	29	2	1999		0.727	69.651							6.20918	54.8811
PMEL	Indian	AEROINDO99	94	29	2	1999		1.5	70.552							6.56721	74.6161
PMEL	Indian	AEROINDO99	95	29	2	1999		2.298	71.495							5.58503	81.1575
PMEL	Indian	AEROINDO99	96	29	2	1999		2.636	71.887							2.87557	33.8156
PMEL	Indian	AEROINDO99	97	5	3	1999		4.944	73.475							9.95726	80.6586
PMEL	Indian	AEROINDO99	98	5	3	1999		4.944	73.475							9.925	82.4325
PMEL	Indian	AEROINDO99	99	5	3	1999		4.96	73.485							10.3766	87.4771
PMEL	Indian	AEROINDO99	100	5	3	1999		4.962	73.485							11.2426	84.4836
PMEL	Indian	AEROINDO99	101	6	3	1999		4.942	72.789							11.2185	81.3792
PMEL	Indian	AEROINDO99	102	6	3	1999		5.646	71.841							11.1088	78.3857
PMEL	Indian	AEROINDO99	103	6	3	1999		6.405	70.955							10.2459	160.652
PMEL	Indian	AEROINDO99	104	6	3	1999		7.095	70.137							9.29764	154.72
PMEL	Indian	AEROINDO99	105	7	3	1999		8.029	69.334							8.73155	141.471
PMEL	Indian	AEROINDO99	106	7	3	1999		9.189	68.882							8.41706	128
PMEL	Indian	AEROINDO99	107	7	3	1999		10.4	68.496							6.54786	72.565
PMEL	Indian	AEROINDO99	108	7	3	1999		10.96	68.352							5.48665	69.128
PMEL	Indian	AEROINDO99	109	8	3	1999		11.651	68.172							8.18644	107.656
PMEL	Indian	AEROINDO99	110	8	3	1999		12.327	68.172							8.23805	93.575
PMEL	Indian	AEROINDO99	111	8	3	1999		13.088	68.315							6.34304	56.2115
PMEL	Indian	AEROINDO99	112	8	3	1999		13.55	68.466							6.33497	62.3649
PMEL	Indian	AEROINDO99	113	9	3	1999		14.225	68.743							3.74002	49.2821
PMEL	Indian	AEROINDO99	114	9	3	1999		14.809	69.161							2.37239	33.5384
PMEL	Indian	AEROINDO99	115	9	3	1999		15.356	69.557							2.43367	18.6263
PMEL	Indian	AEROINDO99	116	9	3	1999		15.717	69.816							2.40464	20.7883
PMEL	Indian	AEROINDO99	117	10	3	1999		16.105	69.501							1.36763	23.7264
PMEL	Indian	AEROINDO99	118	10	3	1999		16.57	69.124							1.05314	20.1785
PMEL	Indian	AEROINDO99	119	10	3	1999		17.08	68.708							1.29667	23.172
PMEL	Indian	AEROINDO99	120	10	3	1999		17.401	68.453							1.15797	18.1274
PMEL	Indian	AEROINDO99	121	11	3	1999		18.424	67.606							1.17732	20.4557
PMEL	Indian	AEROINDO99	122	12	3	1999		11.353	67							1.70954	26.9416
PMEL	Indian	AEROINDO99	123	13	3	1999		8.52	67.001							4.44803	999
PMEL	Indian	AEROINDO99	124	13	3	1999		6.422	67							3.9142	44.4592
PMEL	Indian	AEROINDO99	125	13	3	1999		6.405	67.755							3.5352	38.6385
PMEL	Indian	AEROINDO99	126	14	3	1999		6.622	68.942							3.24329	36.6983
PMEL	Indian	AEROINDO99	127	14	3	1999		6.847	70.173							5.00282	50.2799
PMEL	Indian	AEROINDO99	128	14	3	1999		7.113	71.628							5.03185	51.2778
PMEL	Indian	AEROINDO99	129	14	3	1999		7.256	72.416							6.03822	65.5801
PMEL	Indian	AEROINDO99	130	15	3	1999		6.79	73.716							5.09959	60.979
PMEL	Indian	AEROINDO99	131	15	3	1999		6.276	74.552							5.13668	62.8084
PMEL	Indian	AEROINDO99	132	15	3	1999		5.474	74.232							6.13338	68.9617
PMEL	Indian	AEROINDO99	133	15	3	1999		4.981	73.482							4.94637	57.6529
PMEL	Indian	AEROINDO99	134	16	3	1999		4.051	74.022							5.93178	67.6312
PMEL	Indian	AEROINDO99	135	16	3	1999		3.017	74.674							10.8572	999
PMEL	Indian	AEROINDO99	136	16	3	1999		1.751	75							7.93162	85.0934
PMEL	Indian	AEROINDO99	137	16	3	1999		0.662	74.999							5.19313	56.8768
PMEL	Indian	AEROINDO99	138	17	3	1999		-0.489	75.002							4.8867	47.8962
PMEL	Indian	AEROINDO99	139	17	3	1999		-1.694	74.999							4.69962	45.9006
PMEL	Indian	AEROINDO99	140	17	3	1999		-2.961	75.003							2.71268	41.2994
PMEL	Indian	AEROINDO99	141	17	3	1999		-4.365	75.001							2.07886	30.3786
PMEL	Indian	AEROINDO99	142	18	3	1999		-5.378	74.473							3.17555	34.4808
PMEL	Indian	AEROINDO99	143	18	3	1999		-6.195	73.541							2.8788	35.7559
PMEL	Indian	AEROINDO99	144	18	3	1999		-6.932	72.695							2.38852	30.933
PMEL	Indian	AEROINDO99	145	19	3	1999		-8.117	72.579							2.42722	28.4938
PMEL	Indian	AEROINDO99	146	19	3	1999		-9.35	72.684							2.5256	24.2807
PMEL	Indian	AEROINDO99	147	19	3	1999		-10.806	72.767							2.45303	18.9035
PMEL	Indian	AEROINDO99	148	19	3	1999		-12.003	72.317							2.04661	7.70553
PMEL	Indian	AEROINDO99	149	20	3	1999		-12.205	72.084							1.90146	5.59898
PMEL	Indian	AEROINDO99	150	20	3	1999		-10.963	72.25							2.18531	5.87616
PMEL	Indian	AEROINDO99	151	20	3	1999		-9.591	72.435							2.30465	3.93592
PMEL	Indian	AEROINDO99	152	20	3	1999		-8.77	72.545							2.58205	6.59682
PMEL	Indian	AEROINDO99	153	21	3	1999		-7.523	72.708							2.83848	16.5752
PMEL	Indian	AEROINDO99	154	21	3	1999		-6.153	72.89							3.50939	23.2829
PMEL	Indian	AEROINDO99	155	21	3	1999		-4.853	73.06							3.08524	24.946
PMEL	Indian	AEROINDO99	156	21	3	1999		-3.924	73.187							2.4869	22.285
PMEL	Indian	AEROINDO99	157	22	3	1999		-2.547	73.365							2.58689	26.1101
PMEL	Indian	AEROINDO99	158	22	3	1999		-1.359	73.52							2.25304	17.3513
PMEL	Indian	AEROINDO99	159	22	3	1999		-0.141	73.646							2.72397	24.059
PMEL	Indian	AEROINDO99	160	22	3	1999		0.935	73.705							4.5835	60.1475
PMEL	Indian	AEROINDO99	161	23	3	1999		1.948	73.756							5.16733	66.1345
PMEL	Indian	AEROINDO99	162	23	3	1999		3.135	73.816							3.53197	47.0093
PMEL	Indian	AEROINDO99	163	26	3	1999		3.943	74.366							6.02532	82.0999
PMEL	Indian	AEROINDO99	164	27	3	1999		3.643	75.538							6.37529	83.6521
PMEL	Indian	AEROINDO99	165	27	3	1999		3.331	76.759							4.63188	66.8551
PMEL	Indian	AEROINDO99	166	27	3	1999		2.99	78.091							3.15297	41.4657
PMEL	Indian	AEROINDO99	167	27	3	1999		2.736	79.087							2.2353	34.5917
PMEL	Indian	AEROINDO99	168	28	3	1999		2.515	80.316							2.31755	32.208
PMEL	Indian	AEROINDO99	169	28	3	1999		2.583	81.606							2.18047	24.7242
PMEL	Indian	AEROINDO99	170	29	3	1999		4.71	84.699							3.4465	27.1634
PMEL	Indian	AEROINDO99	171	29	3	1999		5.828	85.125							3.62068	34.3145
PMEL	Indian	AEROINDO99	172	29	3	1999		7.155	85.167							3.94162	44.0712
PMEL	Indian	AEROINDO99	173	29	3	1999		7.942	85.165							6.47851	66.9106
PMEL	Indian	AEROINDO99	174	30	3	1999		9.123	85.172							7.81066	71.5117
Dr. Manmohan Sarin, sarin@prl.res.in	Indian	SK161A	AS-1	18	2	2001		13.29	80.53							0.725806	12.2222
Dr. Manmohan Sarin, sarin@prl.res.in	Indian	SK161A	AS-2	18	2	2001		14.35	81.72							0.145161	23.8889
Dr. Manmohan Sarin, sarin@prl.res.in	Indian	SK161A	AS-3	19	2	2001		15.46	82.95							0.129032	17.2222
Dr. Manmohan Sarin, sarin@prl.res.in	Indian	SK161A	AS-4	19	2	2001		16.61	84.2							0.225806	999
Dr. Manmohan Sarin, sarin@prl.res.in	Indian	SK161A	AS-10	22	2	2001		17.6	88.99							0.370968	999
Dr. Manmohan Sarin, sarin@prl.res.in	Indian	SK161A	AS-11	23	2	2001		15.78	89							1.30645	26.1111
Dr. Manmohan Sarin, sarin@prl.res.in	Indian	SK161A	AS-12	23	2	2001		14.13	89							1.12903	26.6667
Dr. Manmohan Sarin, sarin@prl.res.in	Indian	SK161A	AS-13	24	2	2001		12.17	89.01							0.854839	40.5556
Dr. Manmohan Sarin, sarin@prl.res.in	Indian	SK161A	AS-14	24	2	2001		13.01	89.4							0.709677	53.8889
Dr. Manmohan Sarin, sarin@prl.res.in	Indian	SK161A	AS-15	25	2	2001		13	87.52							0.596774	57.7778
Dr. Manmohan Sarin, sarin@prl.res.in	Indian	SK161A	AS-16	25	2	2001		12.99	85.79							0.258065	50.5556
Dr. Manmohan Sarin, sarin@prl.res.in	Indian	SK161A	AS-17	26	2	2001		13	83.84							0.483871	43.8889
Dr. Manmohan Sarin, sarin@prl.res.in	Indian	SK161A	AS-18	26	2	2001		13	82.28							0.435484	21.1111
Dr. Manmohan Sarin, sarin@prl.res.in	Indian	SK-161B	AS-101	2	3	2001		13.12	80.5							999	13.8889
Dr. Manmohan Sarin, sarin@prl.res.in	Indian	SK-161B	AS-102	3	3	2001		13.1	82.5							0.451613	18.3333
Dr. Manmohan Sarin, sarin@prl.res.in	Indian	SK-161B	AS-103	3	3	2001		14.3	84.2							1.04839	36.6667
Dr. Manmohan Sarin, sarin@prl.res.in	Indian	SK-161B	AS-104	4	3	2001		15.3	85.2							5.79032	37.7778
Dr. Manmohan Sarin, sarin@prl.res.in	Indian	SK-161B	AS-105	5	3	2001		12.9	86.7							12.4516	7.22222
Dr. Manmohan Sarin, sarin@prl.res.in	Indian	SK-161B	AS-106	6	3	2001		10.1	85.9							9.95161	999
Dr. Manmohan Sarin, sarin@prl.res.in	Indian	SK-161B	AS-107	7	3	2001		7	85.3							16.9677	999
Dr. Manmohan Sarin, sarin@prl.res.in	Indian	SK-161B	AS-108	8	3	2001		4.2	83.7							13.1129	999
Dr. Manmohan Sarin, sarin@prl.res.in	Indian	SK-161B	AS-109	9	3	2001		1.8	81.8							1.17742	24.4444
Dr. Manmohan Sarin, sarin@prl.res.in	Indian	SK-161B	AS-110	10	3	2001		0.1	79.4							0.225806	35.5556
Dr. Manmohan Sarin, sarin@prl.res.in	Indian	SK-161B	AS-111	12	3	2001		1.52	75.9							0.145161	10
Dr. Manmohan Sarin, sarin@prl.res.in	Indian	SK-161B	AS-112	12	3	2001		1.7	74.3							0.290323	42.7778
Dr. Manmohan Sarin, sarin@prl.res.in	Indian	SK-161B	AS-113	13	3	2001		0.1	72							0.774194	38.8889
Dr. Manmohan Sarin, sarin@prl.res.in	Indian	SK-161B	AS-114	14	3	2001		2.89	71.3							0.596774	39.4444
Dr. Manmohan Sarin, sarin@prl.res.in	Indian	SK-161B	AS-115	15	3	2001		6	71							0.387097	33.3333
Dr. Manmohan Sarin, sarin@prl.res.in	Indian	SK-161B	AS-116	16	3	2001		9.2	71							1.37097	9.44444
Dr. Manmohan Sarin, sarin@prl.res.in	Indian	SK-161B	AS-117	17	3	2001		10.5	71.7							6.16129	999
Dr. Manmohan Sarin, sarin@prl.res.in	Indian	SK-161B	AS-118	18	3	2001		10.8	71.9							6.45161	999
Dr. Manmohan Sarin, sarin@prl.res.in	Indian	SK-161B	AS-119	19	3	2001		13.5	71.1							8.62903	999
Dr. Manmohan Sarin, sarin@prl.res.in	Indian	SK-161B	AS-120	20	3	2001		16.5	70.6							3.58065	999
Dr. Manmohan Sarin, sarin@prl.res.in	Indian	SK-161B	AS-121	21	3	2001		18.2	70.6							13.3871	999
Dr. Manmohan Sarin, sarin@prl.res.in	Indian	SK-182B	AS-202	2	9	2002		19.1	85.2							1.45161	999
Dr. Manmohan Sarin, sarin@prl.res.in	Indian	SK-182B	AS-203	4	9	2002		16.7	83.6							1.12903	999
Dr. Manmohan Sarin, sarin@prl.res.in	Indian	SK-182B	AS-205	11	9	2002		11.9	81							0.483871	999
Dr. Manmohan Sarin, sarin@prl.res.in	Indian	SK-182B	AS-206	15	9	2002		11.6	82.2							2.25806	999
Dr. Manmohan Sarin, sarin@prl.res.in	Indian	SK-182B	AS-207	16	9	2002		10.1	84.2							1.77419	999
Dr. Manmohan Sarin, sarin@prl.res.in	Indian	SK-182B	AS-208	17	9	2002		8.36	86.3							1.12903	999
Dr. Manmohan Sarin, sarin@prl.res.in	Indian	SK-182B	AS-209	17	9	2002		7.06	88.1							0.483871	999
Dr. Manmohan Sarin, sarin@prl.res.in	Indian	SK-182B	AS-210	19	9	2002		9.14	88.2							5.32258	999
Dr. Manmohan Sarin, sarin@prl.res.in	Indian	SK-182B	AS-211	22	9	2002		13.1	88							7.90323	999
Dr. Manmohan Sarin, sarin@prl.res.in	Indian	SK-182B	AS-212	29	9	2002		20.2	87.9							5.80645	999
Dr. Manmohan Sarin, sarin@prl.res.in	Indian	Sarin03	AS-301	19	2	2003		13.1	81.4							2.09677	52.7778
Dr. Manmohan Sarin, sarin@prl.res.in	Indian	Sarin03	AS-302	19	2	2003		13.1	82.3							1.12903	78.8889
Dr. Manmohan Sarin, sarin@prl.res.in	Indian	Sarin03	AS-303	20	2	2003		13	84.3							1.45161	58.3333
Dr. Manmohan Sarin, sarin@prl.res.in	Indian	Sarin03	AS-304	20	2	2003		13	85.8							0.967742	41.1111
Dr. Manmohan Sarin, sarin@prl.res.in	Indian	Sarin03	AS-305	21	2	2003		13.1	87							0.806452	77.2222
Dr. Manmohan Sarin, sarin@prl.res.in	Indian	Sarin03	AS-306	21	2	2003		14.3	87							1.12903	88.3333
Dr. Manmohan Sarin, sarin@prl.res.in	Indian	Sarin03	AS-307	21	2	2003		15.5	87							1.12903	61.6667
Dr. Manmohan Sarin, sarin@prl.res.in	Indian	Sarin03	AS-308	22	2	2003		16.7	87							0.806452	57.2222
Dr. Manmohan Sarin, sarin@prl.res.in	Indian	Sarin03	AS-309	22	2	2003		17.9	87							2.25806	66.6667
Dr. Manmohan Sarin, sarin@prl.res.in	Indian	Sarin03	AS-310	22	2	2003		18.8	87							2.58065	100.556
Dr. Manmohan Sarin, sarin@prl.res.in	Indian	Sarin03	AS-311	22	2	2003		19.4	87							4.67742	125.556
Dr. Manmohan Sarin, sarin@prl.res.in	Indian	Sarin03	AS-312	23	2	2003		18.2	86							6.45161	45.5556
Dr. Manmohan Sarin, sarin@prl.res.in	Indian	Sarin03	AS-313	23	2	2003		17.4	85.4							7.25806	26.1111
Dr. Manmohan Sarin, sarin@prl.res.in	Indian	Sarin03	AS-314	23	2	2003		16.7	84.9							4.51613	999
Dr. Manmohan Sarin, sarin@prl.res.in	Indian	Sarin03	AS-315	24	2	2003		16	84.4							1.77419	1.11111
Dr. Manmohan Sarin, sarin@prl.res.in	Indian	Sarin03	AS-316	24	2	2003		15.2	83.8							14.8387	0.38
Dr. Manmohan Sarin, sarin@prl.res.in	Indian	Sarin03	AS-317	24	2	2003		14.5	83.2							28.7097	999
Dr. Manmohan Sarin, sarin@prl.res.in	Indian	Sarin03	AS-318	24	2	2003		13.7	82.7							23.5484	999
Dr. Manmohan Sarin, sarin@prl.res.in	Indian	Sarin03	AS-319	25	2	2003		13	82.2							28.0645	999
Dr. Manmohan Sarin, sarin@prl.res.in	Indian	Sarin03	AS-320	25	2	2003		11.4	82.2							31.6129	0.555556
Dr. Manmohan Sarin, sarin@prl.res.in	Indian	Sarin03	AS-321	25	2	2003		10	82.2							26.6129	999
Dr. Manmohan Sarin, sarin@prl.res.in	Indian	Sarin03	AS-322	26	2	2003		8.4	82.2							19.5161	1.11111
Dr. Manmohan Sarin, sarin@prl.res.in	Indian	Sarin03	AS-323	26	2	2003		6.8	82.8							25.8065	999
Dr. Manmohan Sarin, sarin@prl.res.in	Indian	Sarin03	AS-324	27	2	2003		5.8	80.9							48.2258	0.555556
Dr. Manmohan Sarin, sarin@prl.res.in	Indian	SK-223A	AS-402	19	3	2006		17.7667	84.5							0.824671	127.059
Dr. Manmohan Sarin, sarin@prl.res.in	Indian	SK-223A	AS-403	20	3	2006		20.3933	88.155							1.01523	95.0185
Dr. Manmohan Sarin, sarin@prl.res.in	Indian	SK-223A	AS-405	22	3	2006		19.0045	88.9448							0.489695	77.75
Dr. Manmohan Sarin, sarin@prl.res.in	Indian	SK-223A	AS-406	23	3	2006		18.3155	86.0833							1.46042	42.9259
Dr. Manmohan Sarin, sarin@prl.res.in	Indian	SK-223A	AS-408	24	3	2006		16.9927	89.4568							0.406362	86.9223
Dr. Manmohan Sarin, sarin@prl.res.in	Indian	SK-223A	AS-409	25	3	2006		16.0672	93.2468							1.18011	90.5051
Dr. Manmohan Sarin, sarin@prl.res.in	Indian	SK-223A	AS-410	26	3	2006		15.015	89.808							0.789427	118.347
[truncated: 898 more rows]
