# Supplementary material for: Observation- and Model-Based Estimates of Particulate Dry Nitrogen Deposition to the Oceans
Source: Copernicus journal article supplement (doi:10.5194/acp-2016-1123), 2017-01-16
Supplement: Supplementary file 2 [file Supplement.docx]

**Table S1.** Data sources used to compile the global aerosol nitrate and ammonium concentration databases (** data available from COST735 Aerosol and Rainwater Chemistry Database, * data available from other database)

Atlantic Ocean

| **Cruise** | **Dates** | **Originator / Data Source** | **NO3-** | **NH4+** | **Reference** |
| --- | --- | --- | --- | --- | --- |
| CH127 | Jun – Jul 1996 | Lucy Spokes ** | x | x | (Spokes et al., 2000) |
| CH133 | May 1997 | Lucy Spokes ** | x | x | (Spokes et al., 2000) |
| ACE-2 | Jun – Jul 1997 | NOAA, PMEL * | x | x |  |
| NAE98 | Jun – Jul 1998 | Lucy Spokes ** | x | x | (Spokes and Jickells, 2005) |
| AEROINDO99 | Jan – Feb 1999 | NOAA, PMEL * | x | x |  |
| Akademic Fedorov | Nov 1999 | Aki Virkkula ** | x | x | (Virkkula et al., 2006) |
| ANT18-1 | Oct 2000 | Alex Baker ** | x |  | (Baker et al., 2010) |
| JCR | Sep – Oct 2001 | Alex Baker ** | x | x | (Baker et al., 2010) |
| NEAQS2002 | Jul – Aug 2002 | NOAA, PMEL * | x | x |  |
| PE203 | Oct 2002 | Alex Baker ** | x | x | (Powell et al., 2015) |
| M55 | Oct – Nov 2002 | Alex Baker ** | x | x | (Baker et al., 2010) |
| JR90 (AMT12) | May – Jun 2003 | Alex Baker ** | x | x | (Baker et al., 2010) |
| 33RO | Jun – Aug 2003 | Clifton S. Buck ** | x |  | (Buck et al., 2010) |
| JR91 (AMT13) | Sep – Oct 2003 | Alex Baker ** | x | x | (Baker et al., 2010) |
| ANT21-1 | Oct – Nov 2003 | Alex Pzsenny / Bill Keene | x | x | (Keene et al., 2009) |
| D279 (24N) | Apr – May 2004 | Alex Baker ** | x | x | (Baker et al., 2010) |
| JR101 (AMT14) | May 2004 | Alex Baker ** | x | x | (Baker et al., 2010) |
| P311 (FEEP) | May 2004 | Alex Baker ** | x | x | (Powell et al., 2015) |
| NEAQS2004 | Jul – Aug 2004 | NOAA, PMEL * | x | x |  |
| D284 (AMT15) | Sep – Oct 2004 | Alex Baker ** | x | x | (Baker et al., 2010) |
| P320/1 (AIM) | Mar – Apr 2005 | Alex Baker ** | x | x | (Powell et al., 2015) |
| CD171 (36N) | May – Jun 2005 | Alex Baker ** | x | x | (Baker et al., 2010) |
| D294 (AMT16) | May – Jun 2005 | Alex Baker ** | x | x | (Baker et al., 2010) |
| D299 (AMT17) | Oct – Nov 2005 | Alex Baker ** | x | x | (Baker et al., 2010) |
| ANT23-1 | Oct – Nov 2005 | Alex Baker ** | x | x | (Baker et al., 2010) |
| P332 | Jan – Feb 2006 | Alex Baker ** | x | x | (Powell et al., 2015) |
| M68/3 | Jul – Aug 2006 | Alex Baker ** | x | x | (Powell et al., 2015) |
| TEXAQS | Jul – Sep 2006 | NOAA, PMEL * | x | x |  |
| P348 | Feb 2007 | Alex Baker ** | x | x | (Powell et al., 2015) |
| ANT23-10 | Apr – May 2007 | Samuel Morin | x |  | (Morin et al., 2009) |
| D319 | May – Jun 2007 | Alex Baker ** | x | x | (Powell et al., 2015) |
| D321A | Aug 2007 | Alex Baker ** | x |  |  |
| M/V Oceanic II, “The Scholar Ship” | Sep – Oct 2007 | Fudan University ** | x | x |  |
| D325 (INSPIRE) | Nov – Dec 2007 | Alex Baker ** | x | x | (Powell et al., 2015) |
| JC18 | Dec 2007 | Alex Baker ** | x | x | (Lin et al., 2016) |
| D326 | Jan 2008 | Alex Baker ** | x | x | (Powell et al., 2015) |
| MD166 (Bonus-Goodhope) | Feb – Mar 2008 | Alex Baker ** | x | x |  |
| ANT24-3 (ZeroDrake) | Feb – Apr 2008 | Alex Baker ** | x | x |  |
| M/V Oceanic II, “The Scholar Ship” | Mar 2008 | Fudan University ** | x | x | (Zhang et al., 2010) |
| ICEALOT | Mar – Apr 2008 | NOAA, PMEL * | x | x |  |
| ANT24-4 | Apr – May 2008 | Alex Baker ** | x | x | (Powell et al., 2015) |
| JR218 (AMT18) | Oct – Nov 2008 | Alex Baker ** | x | x | (Powell et al., 2015) |
| JC32 | Mar – Apr 2009 | Alex Baker ** | x |  |  |
| D338 (ICON) | Apr – May 2009 | Alex Baker ** | x |  | (Powell et al., 2015) |
| D340 | Jun 2009 | Alex Baker ** | x |  |  |
| JC39 (AMT19) | Oct – Nov 2009 | Alex Baker ** | x | x | (Powell et al., 2015) |
| D350 | Apr – May 2010 | Alex Baker ** | x | x |  |
| ANT26-4 | Apr – May 2010 | Alex Baker ** | x | x |  |
| P399 | Jun 2010 | Alex Baker ** | x |  | (Powell et al., 2015) |
| D354 | Jul – Aug 2010 | Alex Baker ** | x | x |  |
| D371 (AMT21) | Oct – Nov 2011 | Alex Baker ** | x |  | (Powell et al., 2015) |

Indian Ocean

| **Cruise** | **Dates** | **Originator / Data Source** | **NO3-** | **NH4+** | **Reference** |
| --- | --- | --- | --- | --- | --- |
| MB95-02 to MB95-07 | Mar – Oct 1995 | Joe Prospero ** | x | x | (Krishnamurti et al., 1998; Rhoads et al., 1997) |
| M32/3 | May 1995 | Anne Johansen | x | x | (Siefert et al., 1999) |
| M32/5 | Jul 1995 | Anne Johansen | x | x | (Siefert et al., 1999) |
| SK109 | Jan – Feb 1996 | Joe Prospero ** | x | x | (Krishnamurti et al., 1998) |
| SS164 | Mar 1996 | Manmohan Sarin | x |  | (Sarin et al., 1999) |
| SK120 | Dec 1996 – Jan 1997 | Joe Prospero ** |  | x |  |
| SK121 | Feb 1997 | Manmohan Sarin | x |  | (Sarin et al., 1999) |
| SS152 | Feb 1997 | Manmohan Sarin | x |  | (Sarin et al., 1999) |
| SO117 | Mar 1997 | Anne Johansen | x | x | (Bange et al., 2000) |
| SK133 | Feb – Mar 1998 | Joe Prospero ** | x | x |  |
| AEROINDO99 | Feb – Mar 1999 | NOAA, PMEL * | x | x |  |
| SS172 | Feb 1999 | Manmohan Sarin | x |  | (Rengarajan and Sarin, 2004) |
| SK161A | Feb 2001 | Manmohan Sarin | x | x | (Srinivas et al., 2011) |
| SK-161B | Mar 2001 | Manmohan Sarin | x | x | (Srinivas et al., 2011) |
| SK-182B | Sep 2002 | Manmohan Sarin | x |  |  |
| Sarin03 | Feb 2003 | Manmohan Sarin | x | x | (Srinivas et al., 2011) |
| SK223A | Mar – Apr 2006 | Manmohan Sarin | x | x | (Kumar et al., 2008) |
| KNOX11RR | Nov 2007 | Alex Baker ** | x | x | (Witt et al., 2010) |
| SK-254 | Dec 2008 – Jan 2009 | Manmohan Sarin | x | x | (Srinivas et al., 2011) |
| KH09-5 | Nov 2009 – Jan 2010 | Mitsuo Uematsu | x |  |  |
| DYNAMO | Oct – Dec 2011 | NOAA, PMEL * | x | x |  |

Pacific Ocean

| **Cruise** | **Dates** | **Originator / Data Source** | **NO3-** | **NH4+** | **Reference** |
| --- | --- | --- | --- | --- | --- |
| ACE-1 | Oct – Dec 1995 | NOAA, PMEL * | x | x |  |
| KH98-3 | Jul – Aug 1998 | Motoki Sasakawa | x | x | (Sasakawa and Uematsu, 2002) |
| ACE-ASIA | Mar – Apr 2001 | NOAA, PMEL * | x | x |  |
| KH-01-3 | Nov 2001 – Feb 2002 | Atsushi Ooki |  | x | (Ooki et al., 2007) |
| KH02-3 | Sep – Oct 2002 | Tokuhiro Nakamura | x | x |  |
| KH04-1 | Mar 2004 | Tokuhiro Nakamura | x | x | (Nakamura et al., 2006) |
| 318M | Jun – Aug 2004 | Clifton S. Buck ** | x |  |  |
| P16S | Jan – Feb 2005 | Clifton S. Buck ** | x |  |  |
| ORII_CR1270, ORII_CR1271 & FRI_SEATS 33 | Mar 2005 | S-C Hsu | x | x | (Hsu et al., 2010) |
| ORII_CR1274 | Apr 2005 | S-C Hsu | x | x |  |
| ORI_CR 756 & FRI_MOSSAT | Jun 2005 | S-C Hsu | x | x |  |
| FRI_SEATS 34 | Jul 2005 | S-C Hsu | x | x |  |
| FRI_MOSSAT -2 & ORI_CR 780 | Dec 2005 | S-C Hsu | x | x |  |
| P16N | Feb - Mar 2005 | Clifton S. Buck ** | x |  |  |
| ORII_CR1337, ORII_CR1338 & ORII_CR1340 | Mar 2006 | S-C Hsu | x | x | (Hsu et al., 2010) |
| ORII_CR1343 & ORII_CR1344 | Apr 2006 | S-C Hsu | x | x | (Hsu et al., 2010) |
| FRI_JHS | May 2006 | S-C Hsu | x | x |  |
| FRI_SEATS 37 | Jul 2006 | S-C Hsu | x | x |  |
| ORI_CR 812 | Oct 2006 | S-C Hsu | x | x |  |
| ORI_CR 815 | Nov 2006 | S-C Hsu | x | x | (Hsu et al., 2010) |
| ORI_CR 821 | Jan 2007 | S-C Hsu | x | x |  |
| ORII_CR1421, ORII_CR1422 & ORII_CR1424 | Mar 2007 | S-C Hsu | x | x | (Hsu et al., 2010) |
| ORII_CR1428 | Apr 2007 | S-C Hsu | x | x | (Hsu et al., 2010) |
| TF5-1 | May – Jun 2007 | Alex Baker | x | x | (Martino et al., 2014) |
| FRI_JHS -2 | May – Jun 2007 | S-C Hsu | x | x |  |
| ORI_CR 836 & ORI_CR 837 | Jul 2007 | S-C Hsu | x | x |  |
| M/V Oceanic II, “The Scholar Ship” | Oct –Dec 2007 | Fudan University ** | x | x | (Zhang et al., 2010) |
| HSu07 | Dec 2007 | S-C Hsu | x | x |  |
| ORI_CR 855 | Jan 2008 | S-C Hsu | x | x |  |
| ORII_CR1524 | Mar 2008 | S-C Hsu | x | x |  |
| TF5-2 | Apr – May 2008 | Alex Baker | x | x | (Martino et al., 2014) |
| ORII_CR1528 & ORII_CR1529 | Apr 2008 | S-C Hsu | x | x |  |
| KH-08-2 | Jul – Sep 2008 | Jinyoung Jung | x | x | (Jung et al., 2011) |
| ORI_CR 870 | Jul 2008 | S-C Hsu | x | x |  |
| TF5-3 | Aug – Sep 2008 | Alex Baker | x | x | (Martino et al., 2014) |
| VOCALS | Oct – Nov 2008 | NOAA, PMEL * | x | x |  |
| MR08-06 | Jan – Mar 2009 | Jinyoung Jung | x | x | (Jung et al., 2011) |
| TF5-5 | Oct – Nov 2009 | Alex Baker | x | x | (Martino et al., 2014) |
| SO202 (TransBrom) | Oct 2009 | Alex Baker | x | x | (Martino et al., 2014) |
| KH09-5 | Nov 2009 | Mitsuo Uematsu | x |  |  |
| CALNEX | May – Jun 2010 | NOAA, PMEL * | x | x |  |
| KH11-10 | Dec 2011 – Jan 2012 | Mitsuo Uematsu | x | x |  |
| KH12-1 | Feb – Mar 2012 | Mitsuo Uematsu | x | x |  |
| SO218 (SHIVA) | Nov 2011 | Alex Baker | x |  |  |
| M91 | Dec 2012 | Alex Baker | x | x | (Baker et al., 2016) |

**Table S2**. Emissions (Gg-N yr-1) of nitrogen oxides (NOx) and ammonia (NH3) used in ACCMIP models and in TM4 in.

|  | ACCMIP MMM (2000) | | TM4 (RCP6 2005) | |
| --- | --- | --- | --- | --- |
|  | NOx | NH3 | NOx | NH3 |
| Global | 46.44 | 49.01 | 49.36 | 52.64 |
| Africa | 0.495 | 0.307 | 0.616 | 0.338 |
| India | 1.818 | 2.657 | 2.194 | 3.332 |
| SE Asia-Japan | 3.250 | 1.543 | 3.895 | 1.798 |

**Figure S1** Global maps showing the distribution of dry deposition velocity calculated from annual mean surface wind speed using the variable vd method for a) nitrate and b) ammonium and applied in the calculation of CalDep for these species.

**Figure S2** Summary of observed NO3- aerosol database: a) number of observations for each grid cell, b) number of calendar months for which there are observations, c) mean observed concentration and d) relative standard deviations of mean concentrations.

**Figure S3** Summary of observed NH4+ aerosol database: a) number of observations for each grid cell, b) number of calendar months for which there are observations, c) mean observed concentration and d) relative standard deviations of mean concentrations.

**Figure S4** Global maps showing the percentage difference between modelled a) nitrate and b) ammonium concentrations from TM4 and mean observed aerosol concentrations for those species.

**Figure S5** Scatter plots comparing dry deposition fluxes (mg N m-2 d-1) of a) – c) NO3- and d) – f) NH4+ derived from the observational database with corresponding fluxes from model output. Panels represent comparisons to a) NOy from ACCMIP, b) NOy from TM4, c) NO3- from TM4, d) NHx from ACCMIP, e) NHx from TM4 and f) NH4+ from TM4. CalDep calculated by the fixed vd method. Explanations of marker sizes and colours are given in the legend for Fig. 4.

**Figure S6** Global maps showing the percentage difference between modelled NOy / NO3- dry deposition fluxes from ACCMIP and TM4 and mean observed dry deposition of NO3- calculated using the fixed and variable vd methods. Panels show comparisons of a) & d) ACCMIP NOy, b) & e) TM4 NOy and c) & f) TM4 NO3- to observed fluxes calculated using the fixed vd (left column) and variable vd (right column) methods.

**Figure S7** Global maps showing the percentage difference between modelled NHx / NH4+ dry deposition fluxes from ACCMIP and TM4 and mean observed dry deposition of NH4+ calculated using the fixed and variable vd methods. Panels show comparisons of a) & d) ACCMIP NHx, b) & e) TM4 NHx and c) & f) TM4 NH4+ to observed fluxes calculated using the fixed vd (left column) and variable vd (right column) methods.

**Figure S8** Global maps showing the relative standard deviations of the monthly mean a) nitrate and b) ammonium concentrations simulated by the TM4 model. (Over the Southern Ocean and Arctic Ocean, rsd values for ammonium were greater than 100% because aerosol concentrations were very low).

**References**

Baker, A. R., Lesworth, T., Adams, C., Jickells, T. D., and Ganzeveld, L.: Estimation of atmospheric nutrient inputs to the Atlantic Ocean from 50°N to 50°S based on large-scale field sampling: Fixed nitrogen and dry deposition of phosphorus, Global Biogeochemical Cycles, 24, GB3006, 10.1029/2009GB003634, 2010.

Baker, A. R., Thomas, M., Bange, H. W., and Plasencia Sánchez, E.: Soluble trace metals in aerosols over the tropical south-east Pacific offshore of Peru, Biogeosciences, 13, 817-825, 10.5194/bg-13-817-2016, 2016.

Bange, H. W., Rixen, T., Johansen, A. M., Siefert, R. L., Ramesh, R., Ittekkot, V., Hoffmann, M. R., and Andreae, M. O.: A revised nitrogen budget for the Arabian Sea, Global Biogeochemical Cycles, 14, 1283-1297, 10.1029/1999gb001228, 2000.

Buck, C. S., Landing, W. M., Resing, J. A., and Measures, C. I.: The solubility and deposition of aerosol Fe and other trace elements in the North Atlantic Ocean: Observations from the A16N CLIVAR/CO2 repeat hydrography section, Marine Chemistry, 210, 57-70, 10.1016/j.marchem.2008.08.003, 2010.

Hsu, S. C., Liu, S. C., Arimoto, R., Shiah, F.-K., Gong, G.-C., Huang, Y. T., Kao, S. J., Chen, J. P., Lin, F. J., Lin, C. Y., Huang, J. C., Tsai, F., and Lung, S.-C. C.: Effects of acidic processing, transport history, and dust and sea salt loadings on the dissolution of iron from Asian dust, J. Geophys. Res., 115, D19313, 10.1029/2009JD013442, 2010.

Jung, J. Y., Furutani, H., and Uematsu, M.: Atmospheric inorganic nitrogen in marine aerosol and precipitation and its deposition to the North and South Pacific Oceans, Journal of Atmospheric Chemistry, 68, 157-181, 10.1007/s10874-012-9218-5, 2011.

Keene, W. C., Long, M. S., Pszenny, A. A. P., Sander, R., Maben, J. R., Wall, A. J., O'Halloran, T. L., Kerkweg, A., Fischer, E. V., and Schrems, O.: Latitudinal variation in the multiphase chemical processing of inorganic halogens and related species over the eastern North and South Atlantic Oceans, Atmospheric Chemistry and Physics, 9, 7361-7385, 2009.

Krishnamurti, T. N., Jha, B., Prospero, J., Jayaraman, A., and Ramanathan, V.: Aerosol and pollutant transport and their impact on radiative forcing over the tropical Indian Ocean during the January-February 1996 pre-INDOEX cruise, Tellus Series B-Chemical and Physical Meteorology, 50, 521-542, 1998.

Kumar, A., Sudheer, A. K., and Sarin, M. M.: Chemical characteristics of aerosols in MABL of Bay of Bengal and Arabian Sea during spring inter-monsoon: A comparative study, Journal of Earth System Science, 117, 325-332, 2008.

Lin, C. T., Jickells, T., Baker, A. R., Marca, A., and Johnson, M.: Aerosol isotopic ammonium signatures over the remote Atlantic Ocean, Atmospheric Environment, 133, 165-169, 10.1016/j.atmosenv.2016.03.020, 2016.

Martino, M., Hamilton, D., Baker, A. R., Jickells, T. D., Bromley, T., Nojiri, Y., Quack, B., and Boyd, P. W.: Western Pacific atmospheric nutrient deposition fluxes, their impact on surface ocean productivity, Global Biogeochemical Cycles, 28, 712-728, 10.1002/2013GB004794, 2014.

Morin, S., Savarino, J., Frey, M. M., Domine, F., Jacobi, H. W., Kaleschke, L., and Martins, J. M. F.: Comprehensive isotopic composition of atmospheric nitrate in the Atlantic Ocean boundary layer from 65S to 79N, J. Geophys. Res., 114, D05303, 10.1029/2008JD010696, 2009.

Nakamura, T., Ogawa, H., Maripi, D. K., and Uematsu, M.: Contribution of water soluble organic nitrogen to total nitrogen in marine aerosols over the East China Sea and western North Pacific, Atmospheric Environment, 40, 7259-7264, 2006.

Ooki, A., Uematsu, M., and Noriki, S.: Size-resolved sulfate and ammonium measurements in marine boundary layer over the North and South Pacific, Atmospheric Environment, 41, 81-91, 2007.

Powell, C. F., Baker, A. R., Jickells, T. D., Bange, H. W., Chance, R., and Yodle, C.: Estimation of the atmospheric flux of nutrients and trace metals to the eastern tropical North Atlantic Ocean, Journal of the Atmospheric Sciences of the American Meteorological Society, 72, 4029-4045, 10.1175/JAS-D-15-0011.1, 2015.

Rengarajan, R., and Sarin, M. M.: Atmospheric deposition fluxes of Be-7, Pb-210 and chemical species to the Arabian Sea and Bay of Bengal, Indian Journal of Marine Sciences, 33, 56-64, 2004.

Rhoads, K. P., Kelley, P., Dickerson, R. R., Carsey, T. P., Farmer, M., Savoie, D. L., and Prospero, J. M.: Composition of the troposphere over the Indian Ocean during the monsoonal transition, Journal of Geophysical Research-Atmospheres, 102, 18981-18995, 1997.

Sarin, M. M., Rengarajan, R., and Krishnaswami, S.: Aerosol NO3- and 210Pb distribution over the central-eastern Arabian Sea and their air-sea deposition fluxes, Tellus Series B-Chemical and Physical Meteorology, 51, 749-758, 1999.

Sasakawa, M., and Uematsu, M.: Chemical composition of aerosol, sea fog, and rainwater in the marine boundary layer of the northwestern North Pacific and its marginal seas, Journal of Geophysical Research-Atmospheres, 107, 4783, 10.1029/2001jd001004, 2002.

Siefert, R. L., Johansen, A. M., and Hoffmann, M. R.: Chemical characterization of ambient aerosol collected during the southwest monsoon and intermonsoon seasons over the Arabian Sea: Labile-Fe(II) and other trace metals., Journal of Geophysical Research-Atmospheres, 104, 3511-3526, 1999.

Spokes, L. J., Yeatman, S. G., Cornell, S. E., and Jickells, T. D.: Nitrogen deposition to the eastern Atlantic Ocean. The importance of south-easterly flow, Tellus, 52B, 37-49, 2000.

Spokes, L. J., and Jickells, T. D.: Is the atmosphere really an important source of reactive nitrogen to coastal waters?, Continental Shelf Research, 25, 2022-2035, 2005.

Srinivas, B., Sarin, M. M., and Sarma, V. V. S. S.: Atmospheric dry deposition of inorganic and organic nitrogen to the Bay of Bengal: Impact of continental outflow, Marine Chemistry, 127, 170-179, 2011.

Virkkula, A., Teinila, K., Hillamo, R., Kerminen, V. M., Saarikoski, S., Aurela, M., Koponen, I. K., and Kulmala, M.: Chemical size distributions of boundary layer aerosol over the Atlantic Ocean and at an Antarctic site, J. Geophys. Res., 111, D05306, doi:10.1029/2004JD004958, 2006.

Witt, M. L. I., Mather, T. A., Baker, A. R., de Hoog, C.-J., and Pyle, D. M.: Atmospheric trace metals over the south-west Indian Ocean: Total gaseous mercury, aerosol trace metal concentrations and lead isotope ratios, Marine Chemistry, 121, 2-16, 10.1016/j.marchem.2010.02.005, 2010.

Zhang, M., Chen, J. M., Wang, T., Cheng, T. T., Lin, L., Bhatia, R. S., and Hanvey, M.: Chemical characterization of aerosols over the Atlantic Ocean and the Pacific Ocean during two cruises in 2007 and 2008, J. Geophys. Res., 115, D22302, 10.1029/2010JD014246, 2010.
